# Supplementary material for: An Experimental Acidity Scale for Intramolecularly Stabilized Silyl Lewis Acids
Source: PubMed Central journal article supplement (PMC6899571; doi:10.1002/chem.201903241), 2019-10-31
Supplement: CHEM-25-15123-s001.pdf [file CHEM-25-15123-s001.pdf]

# CHEMISTRY

## A **European** Journal

### Supporting Information

#### **An Experimental Acidity Scale for Intramolecularly Stabilized Silyl Lewis Acids**

Sandra Künzler<sup>+</sup>, Saskia Rathjen<sup>+</sup>, Anastasia Merk<sup>+</sup>, Marc Schmidtman, and Thomas Müller<sup>\*[a]</sup>

chem\_201903241\_sm\_miscellaneous\_information.pdf

|                                                                                                                             |     |
|-----------------------------------------------------------------------------------------------------------------------------|-----|
| 1. Experimental part.....                                                                                                   | 1   |
| 1.1. General Remarks.....                                                                                                   | 1   |
| 1.2. Syntheses of Silanes .....                                                                                             | 3   |
| 1.3. Syntheses of Nitrilium Ions .....                                                                                      | 9   |
| 1.4. 4-Fluorobenzonitrile + Tritylborate in CD <sub>2</sub> Cl <sub>2</sub> .....                                           | 53  |
| 1.5. Tris(pentafluorophenyl)borane 4-fluorobenzonitrile adduct <b>4</b> .....                                               | 55  |
| 1.6. Gutmann-Beckett method for silyl cation <b>2c</b> .....                                                                | 59  |
| 1.7. Variable temperature NMR measurements of nitrilium ion <b>10c</b> with an excess 4-fluorobenzonitrile .....            | 61  |
| 1.8. Reaction of bromonium borate <b>2e</b> [B(C <sub>6</sub> F <sub>5</sub> ) <sub>4</sub> ] with silane <b>7c</b> .....   | 62  |
| 1.9. Data from X-ray diffraction analysis of compounds.....                                                                 | 66  |
| 1.9.1. Data from X-ray diffraction analysis of compound BCF adduct <b>4</b> .....                                           | 66  |
| 1.9.2. Data from X-ray diffraction analysis of compound [ <b>2c</b> ] <sub>2</sub> [B <sub>12</sub> Br <sub>12</sub> ]..... | 68  |
| 2. Computational Details .....                                                                                              | 70  |
| 2.1. Computed Structures XYZ-files .....                                                                                    | 72  |
| 3. References.....                                                                                                          | 102 |

## 1. Experimental part

### 1.1. General Remarks

All experiments were carried out under argon or nitrogen atmosphere using Schlenk techniques. The glass equipment was stored in an oven at 120°C and evacuated prior to use. The solvents *n*-pentane, *n*-hexane, benzene, tetrahydrofuran and diethyl ether were dried over sodium-potassium alloy and distilled under nitrogen atmosphere. Dichloromethane was dried over sodium hydride. The deuterated solvents were first dried over sodium-potassium alloy and then either condensed before use or stored over molecular sieve (4 Å). Dichloromethane-d<sub>2</sub> and trimethylsilane were stored over molecular sieve (4 Å). Commercially available solid materials were stored and weighted in a glove box or dried at high vacuum before use. *n*-Butyl lithium was used as a 1.6 M solution in *n*-hexane. N,N,N',N'-Tetramethylethylenediamine (TMEDA) was dried over potassium hydroxide and freshly condensed before use. 1,8-dibromonaphthalene, 5,6-dibromoacenaphthene, 5-dimethylsilylacenaphthene, 6-phenoxy-5-dimethylsilylacenaphthene **7a**, 6-dimethylsilyl-5-thiophenylacenaphthene **7b**, 5-phenylselenyl-6-dimethylsilylacenaphthene **7c**, 6-dimethylsilyl-5-mesityltellurylacenaphthene **7d**, 8-phenoxy-1-dimethylsilylnaphthalene **8a**, 1-bromo-8-dimethylsilylnaphthalene **8e**, bis(pentamethylphenyl)methylsilane and trityl borate [Ph<sub>3</sub>C][B(C<sub>6</sub>F<sub>5</sub>)<sub>4</sub>] were synthesized according to literature procedures.[S1-S7] 5,6-Diiodoacenaphthene: The original procedure [S8] was slightly modified. The reaction mixture was stirred for 1 h at -10 °C – 0 °C after the addition of a solution of iodine in diethylether at -10 °C – 0 °C and was allowed to warm to room temperature overnight. 5,6-Diiodoacenaphthene was obtained as a colorless solid after workup and column chromatography using *n*-pentane (R<sub>f</sub> = 0.41) as eluent.

*Tris*-(2,3,4,5,6-pentamethylphenyl)silylium borate, **1**[B(C<sub>6</sub>F<sub>5</sub>)<sub>4</sub>]: The original procedure [S7] was slightly modified to allow easy handling of the silylium borate. The solvent was removed and the residue was dried in vacuum before the schlenk tube was transferred into the glove box. Then, the residue was pulverized in a mortar until a yellow powder of *tris*(2,3,4,5,6-pentamethylphenyl)silylium borate **1**[B(C<sub>6</sub>F<sub>5</sub>)<sub>4</sub>] was obtained and stored under nitrogen. Silyl arenium borate [Et<sub>3</sub>Si(C<sub>7</sub>D<sub>8</sub>)][B(C<sub>6</sub>F<sub>5</sub>)<sub>4</sub>] was prepared according to literature procedure using toluene-d<sub>8</sub> as solvent.[S9]

Thin-layer chromatography was performed using commercial available aluminum foil (Fluka) coated with silica gel 60 and fluorescent indicator F254. For the column chromatography silica gel of the mesh size 60 from Merck was used.

NMR spectra were recorded on Bruker Avance 500, Bruker Avance III 500 spectrometer.  $^1\text{H}$  NMR spectra were referenced to the residual solvent resonance as internal standard (benzene- $\text{d}_6$ :  $\delta^1\text{H}(\text{C}_6\text{D}_5\text{H}) = 7.20$ , toluene- $\text{d}_8$ :  $\delta^1\text{H}(\text{C}_6\text{D}_5\text{CD}_2\text{H}) = 2.08$ , chlorobenzene- $\text{d}_5$ :  $\delta^1\text{H}(\text{C}_6\text{D}_4\text{HCl}) = 7.14$ , dichloromethane- $\text{d}_2$ :  $\delta^1\text{H}(\text{CDHCl}_2) = 5.32$ ) and  $^{13}\text{C}$  NMR spectra by using the central line of the solvent signal (benzene- $\text{d}_6$ :  $\delta^{13}\text{C}(\text{C}_6\text{D}_6) = 128.0$ , toluene- $\text{d}_8$ :  $\delta^{13}\text{C}(\text{C}_6\text{D}_5\text{CD}_3) = 20.4$ , chlorobenzene- $\text{d}_5$ :  $\delta^{13}\text{C}(\text{C}_6\text{D}_5\text{Cl}) = 134.2$ , dichloromethane- $\text{d}_2$ :  $\delta^1\text{H}(\text{CD}_2\text{Cl}_2) = 54.0$ ).  $^{29}\text{Si}$  NMR spectra were referenced to an external standard ( $\delta^{29}\text{Si}(\text{Me}_2\text{SiHCl}) = 11.1$  versus tetramethylsilane (TMS)),  $^{11}\text{B}$  NMR spectra against  $\text{BF}_3\cdot\text{OEt}_2$  ( $\delta^{11}\text{B}(\text{BF}_3\cdot\text{OEt}_2) = 0.0$ ) and  $^{77}\text{Se}$  NMR spectra against external  $\text{Me}_2\text{Se}$  ( $\delta^{77}\text{Se}(\text{Me}_2\text{Se}) = 0.0$ ). The  $^{31}\text{P}$  NMR spectra were calibrated using an external standard ( $\delta^{31}\text{P}((\text{H}_3\text{CO})_3\text{P}) = 141.0$  versus 85%  $\text{H}_3\text{PO}_4(\text{aq})$ ). The  $^{29}\text{Si}$  NMR inverse gated spectra were recorded with a relaxation delay  $D1 = 10$  s. The  $^{29}\text{Si}$  INEPT spectra were recorded with delays  $D3 = 0.0084$  s and  $D4 = 0.0313$  s, if not given otherwise.

Reference sample for the  $^{19}\text{F}$  NMR chemical shift

The NMR sample was prepared using fluorobenzene (302  $\mu\text{mol}$ , 28  $\mu\text{L}$ ), trityl borate (302  $\mu\text{mol}$ , 278 mg) and 4-fluorobenzonitrile (302  $\mu\text{mol}$ , 37 mg) in 0.55 mL dichloromethane- $d_2$ .

**Table S1** –  $^{19}\text{F}$  NMR chemical shifts of the *p*-fluorine of  $[\text{B}(\text{C}_6\text{F}_5)_4]^-$  and free 4-fluorobenzonitrile (FBN) referenced against fluorobenzene  $\delta^{19}\text{F} = -113.78$  at different temperatures.

| T [K] | $\delta^{19}\text{F}$ $[\text{B}(\text{C}_6\text{F}_5)_4]^-$ | $\delta^{19}\text{F}$ FBN |
|-------|--------------------------------------------------------------|---------------------------|
| 305   | -163.44                                                      | -103.43                   |
| 293   | -163.37                                                      | -                         |
| 283   | -163.29                                                      | -103.38                   |
| 273   | -163.20                                                      | -                         |
| 263   | -163.12                                                      | -103.33                   |
| 253   | -163.04                                                      | -                         |
| 243   | -162.96                                                      | -103.30                   |
| 233   | -162.87                                                      | -103.29                   |
| 223   | -162.79                                                      | -103.30                   |
| 213   | -162.73                                                      | -                         |
| 203   | -162.63                                                      | -103.30                   |
| 193   | -162.57                                                      | -103.31                   |

## 1.2. Syntheses of Silanes

### **5-bromo-6-dimethylsilylacenaphthene 7e**

5,6-Dibromoacenaphthene (2.00 g, 6.41 mmol), was suspended in 50 mL THF and cooled to  $-80\text{ }^\circ\text{C}$ . Then *n*-butyl lithium (1.6 M in *n*-hexane, 4.0 mL, 6.41 mmol) was added dropwise and the reaction mixture was stirred for 1.5 hours at the same temperature. After that chlorodimethylsilane (0.72 mL, 6.41 mmol) was added and the mixture was stirred for an additional hour at  $-80\text{ }^\circ\text{C}$ . Then the reaction mixture was allowed to warm to room temperature overnight. After adding  $\text{NH}_4\text{Cl}$  solution (10 mL) to the reaction mixture and extraction with *n*-pentane (3 x 10 mL), the organic phase was dried over  $\text{MgSO}_4$  and the solvent was removed under low pressure. Silane **7e**

was obtained as a colorless solid after column chromatography using *n*-pentane ( $R_f = 0.48$ ) as eluent. Yield: 1.72 g (5.93 mmol, 93 %, **Fp**: 35-37 °C)

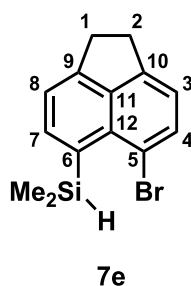

**$^1\text{H NMR}$**  (500.13 MHz, 298.0 K,  $\text{C}_6\text{D}_6$ ):  $\delta = 0.68$  (d, 6H,  $^3J_{\text{H,H}} = 3.6$  Hz,  $\text{Si}(\text{CH}_3)_2$ ), 2.76-2.80 (m, 2H,  $\text{CH}_2$ ), 2.86-2.91 (m, 2H,  $\text{CH}_2$ ), 5.56 (sept, 1H,  $^3J_{\text{H,H}} = 3.6$  Hz,  $^1J_{\text{H,Si}} = 196.9$  Hz, Si-H), 6.72 (d, 1H,  $^3J_{\text{H,H}} = 7.3$  Hz, H-3), 7.04 (d, 1H,  $^3J_{\text{H,H}} = 7.0$  Hz, H-8), 7.69 (d, 1H,  $^3J_{\text{H,H}} = 7.3$  Hz, H-4), 7.98 (d, 1H,  $^3J_{\text{H,H}} = 7.0$  Hz, H-7).  **$^{13}\text{C}\{^1\text{H}\}$  NMR** (125.77 MHz, 298.1 K,  $\text{C}_6\text{D}_6$ ):  $\delta = 0.7$  ( $\text{Si}(\text{CH}_3)_2$ ), 29.6 ( $\text{CH}_2$ ), 30.2 ( $\text{CH}_2$ ), 118.1 ( $\text{C}^q$ , C-5), 119.9 (CH, C-8), 120.5 (CH, C-3), 131.2 ( $\text{C}^q$ , C-6), 133.5 (CH, C-4), 135.9 ( $\text{C}^q$ , C-12), 139.9 (CH, C-7), 141.4 ( $\text{C}^q$ , C-11), 146.8 ( $\text{C}^q$ , C-10), 149.2 ( $\text{C}^q$ , C-9).  **$^{29}\text{Si}\{^1\text{H}\}$  NMR** (99.31 MHz, 305.0 K,  $\text{C}_6\text{D}_6$ ):  $\delta = -14.5$ .  **$^{29}\text{Si}\{^1\text{H}\}$  INEPT NMR** (99.31 MHz, 305.0 K,  $\text{C}_6\text{D}_6$ ,  $D_3 = 0.0084$  s,  $D_4 = 0.0313$  s):  $\delta = -14.4$ .  **$^{29}\text{Si}$  INEPT NMR** (99.31 MHz, 305.0 K,  $\text{C}_6\text{D}_6$ ,  $D_3 = D_4 = 0.0013$  s):  $\delta = -14.3$  (dm,  $^1J_{\text{H,Si}} = 197.0$  Hz). **IR** (ATR, neat):  $\tilde{\nu} = 2170$  (SiH)  $\text{cm}^{-1}$ . **HR/MS** (ESI, pos.): [ $^{12}\text{C}_{14}^1\text{H}_{15}^{79}\text{Br}^{28}\text{Si}$ ], calculated 290.013; measured: 313.0032 [ $^{12}\text{C}_{14}^1\text{H}_{15}^{79}\text{Br}^{28}\text{Si}^{23}\text{Na}$ ]. **EA**:  $\text{C}_{14}\text{H}_{15}\text{BrSi}$ , calculated: C 57.56, H 5.92; measured: C 57.73, H 5.19.

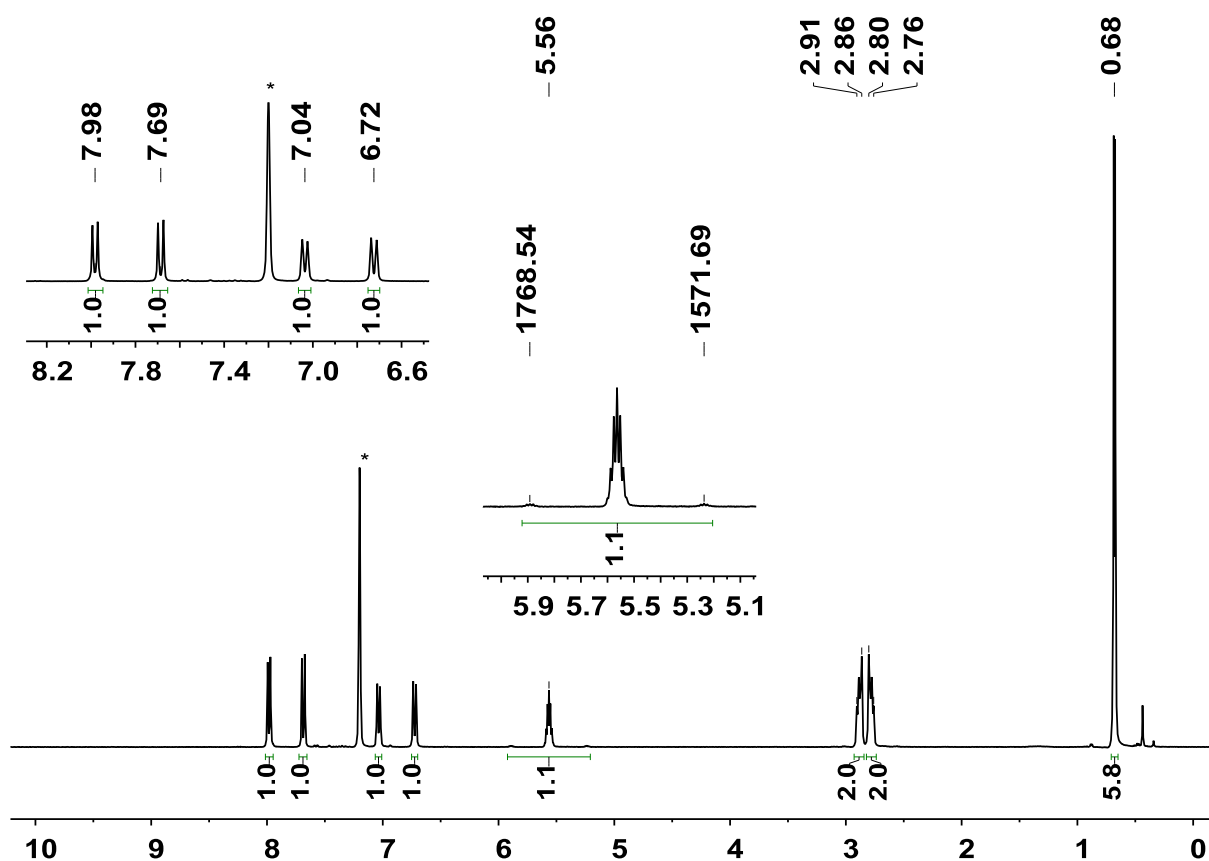

Figure S1 –  $^1\text{H}$  NMR spectrum (500.13 MHz, 298.0 K,  $\text{C}_6\text{D}_6$ ,  $^*\text{C}_6\text{D}_5\text{H}$ ) of silane 7e.

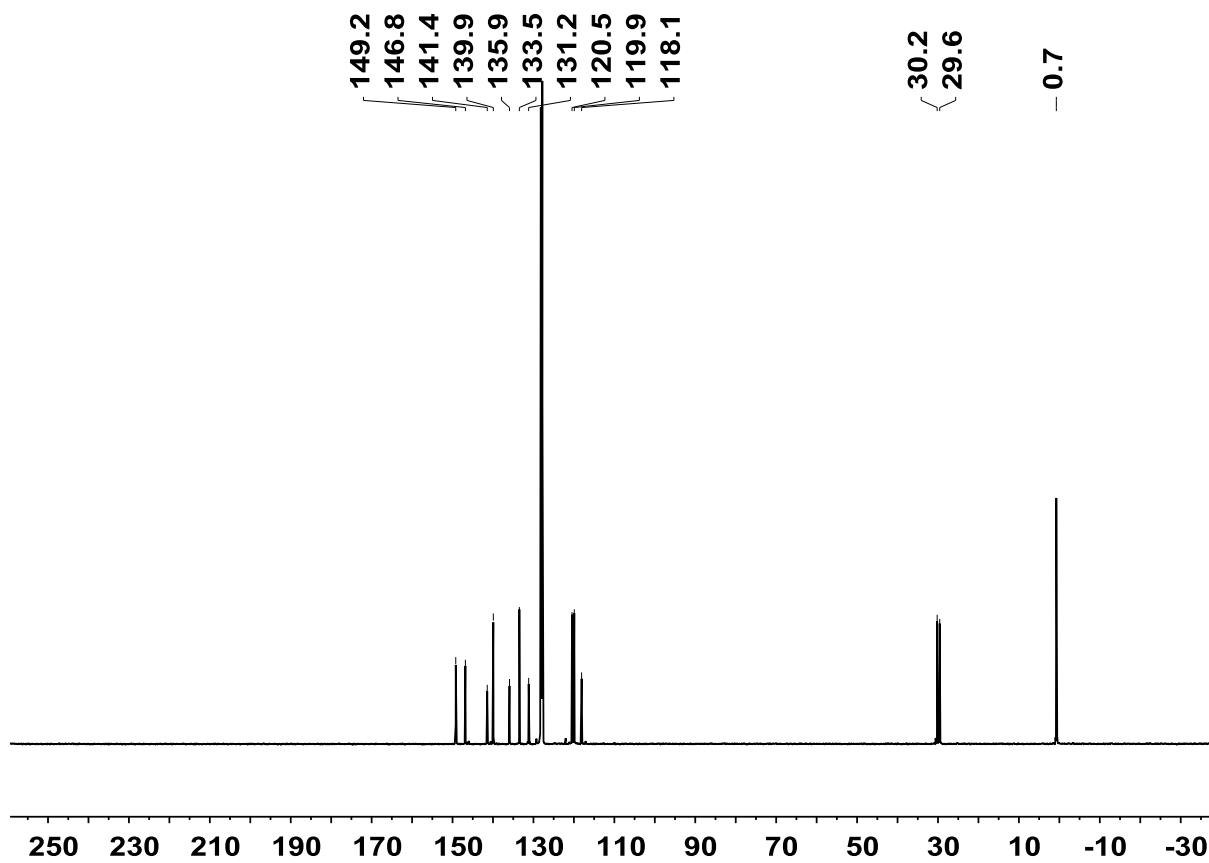

Figure S2 –  $^{13}\text{C}$  NMR spectrum (125.77 MHz, 298.1 K,  $\text{C}_6\text{D}_6$ ,  $^*\text{C}_6\text{D}_6$ ) of silane 7e.

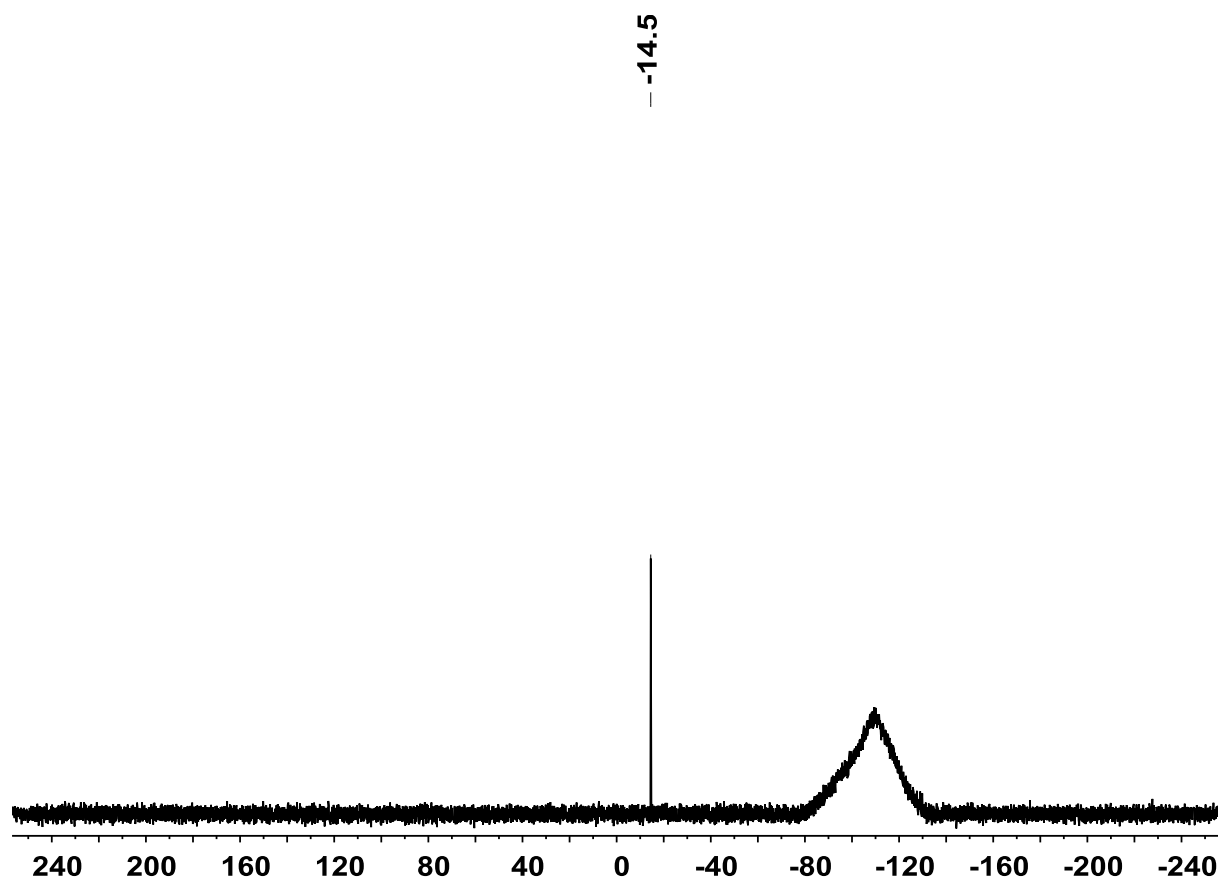

Figure S3 –  $^{29}\text{Si}\{^1\text{H}\}$  NMR spectrum (99.31 MHz, 305.0 K,  $\text{C}_6\text{D}_6$ ) of silane **7e**.

#### **5-iodo-6-dimethylsilylacenaphthene 7f**

5,6-Diiodoacenaphthene (0.93 g, 2.29 mmol), was suspended in 30 mL diethylethter and cooled to  $-80\text{ }^\circ\text{C}$ . Then *n*-butyl lithium (1.6 M in *n*-hexane, 1.4 mL, 2.29 mmol) was added dropwise and the reaction mixture was stirred for 1 hour at the same temperature. After that 15 mL diethylethter was added and the reaction mixture was stirred for 1.5 hours at  $-50\text{ }^\circ\text{C}$ . Chlorodimethylsilane (0.26 mL, 2.29 mmol) was added and the mixture was stirred for an additional hour at  $-50\text{ }^\circ\text{C}$ . Then the reaction mixture was allowed to warm to r.t. overnight. Silane **7f** decomposes by performing an aqueous workup and needs to be stored under inert conditions. The solvent was removed under low pressure, the residue was dried in vacuum and suspended in *n*-pentane. The solution was transferred into another Schlenk flask, the solid was washed two more times and the obtained solutions were also added to the Schlenk flask. After that the solvent was removed again under low pressure and the residue was dried in vacuum. Silane **7f** was obtained as the main product in a reaction mixture with 5-iodoacenaphthene and a small amount of 5-dimethylsilylacenaphthene.



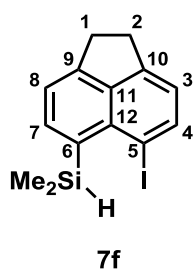

**$^1\text{H}$  NMR** (499.87 MHz, 305.1 K,  $\text{C}_6\text{D}_6$ ):  $\delta$  = 0.70 (d, 6H,  $^3J_{\text{H,H}} = 3.6$  Hz,  $\text{Si}(\text{CH}_3)_2$ ), 2.75-2.86 (m, 4H, 2 x  $\text{CH}_2$ ), 5.96 (sept, 1H,  $^3J_{\text{H,H}} = 3.6$  Hz,  $^1J_{\text{H,Si}} = 199.0$  Hz, Si-H), 6.56 (d, 1H,  $^3J_{\text{H,H}} = 7.3$  Hz, H-3), 6.98 (d, 1H,  $^3J_{\text{H,H}} = 7.0$  Hz, H-8), 7.88 (d, 1H,  $^3J_{\text{H,H}} = 7.0$  Hz, H-7), 8.03 (d, 1H,  $^3J_{\text{H,H}} = 7.3$  Hz, H-4).  **$^{13}\text{C}\{^1\text{H}\}$  NMR** (125.77 MHz, 299.0 K,  $\text{C}_6\text{D}_6$ ):  $\delta$  = 1.4 ( $\text{Si}(\text{CH}_3)_2$ ), 29.6 ( $\text{CH}_2$ ), 29.9 ( $\text{CH}_2$ ), 91.0 ( $\text{C}^q$ , C-5), 119.7 (CH, C-8), 121.3 (CH, C-3), 132.7 ( $\text{C}^q$ , C-6), 139.2 ( $\text{C}^q$ , C-12), 139.9 (CH, C-7), 141.2 ( $\text{C}^q$ , C-11), 142.1 (CH, C-4), 147.8 ( $\text{C}^q$ , C-10), 149.5 ( $\text{C}^q$ , C-9).  **$^{29}\text{Si}\{^1\text{H}\}$  NMR** (99.36 MHz, 298.4 K,  $\text{C}_6\text{D}_6$ ):  $\delta$  = -19.1.

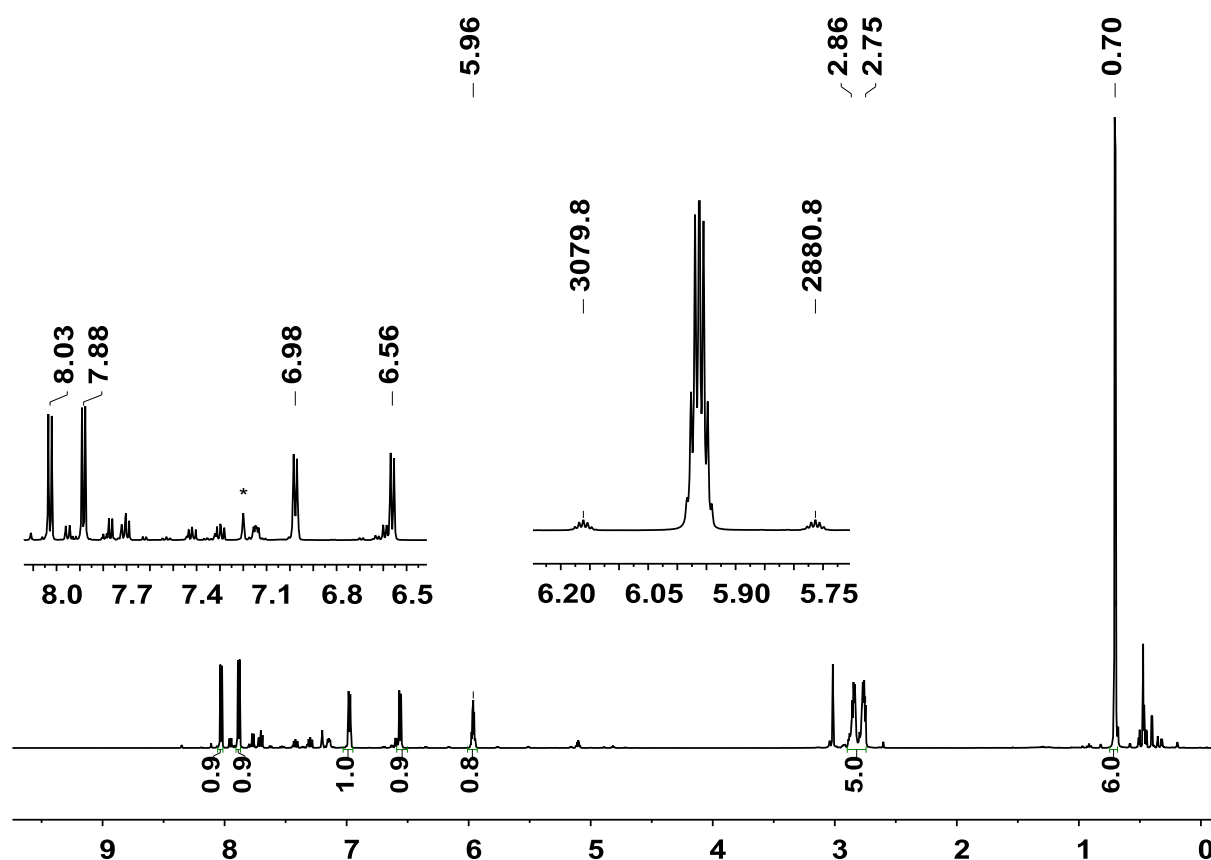

Figure S4 –  $^1\text{H}$  NMR spectrum (499.87 MHz, 305.1 K,  $\text{C}_6\text{D}_6$ ,  $^*\text{C}_6\text{D}_5\text{H}$ ) of the reaction mixture.

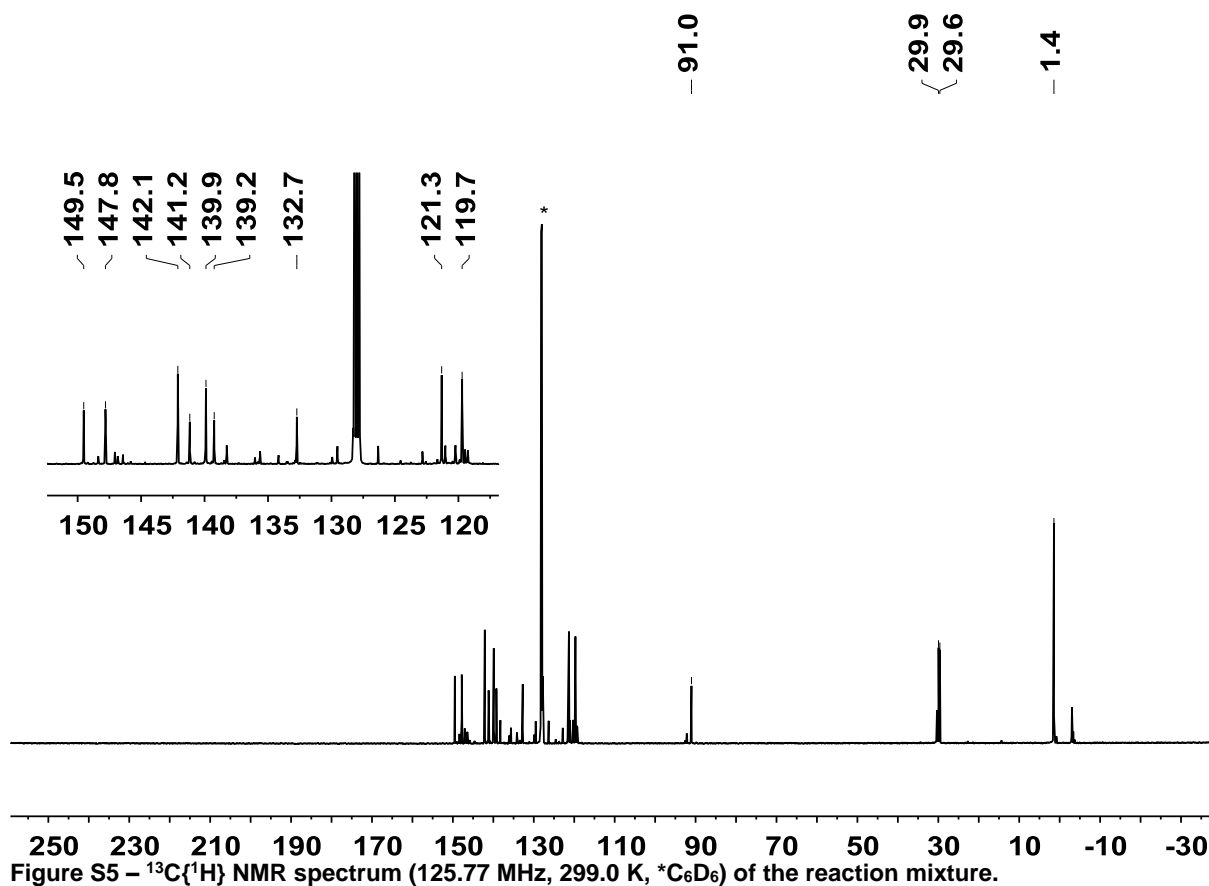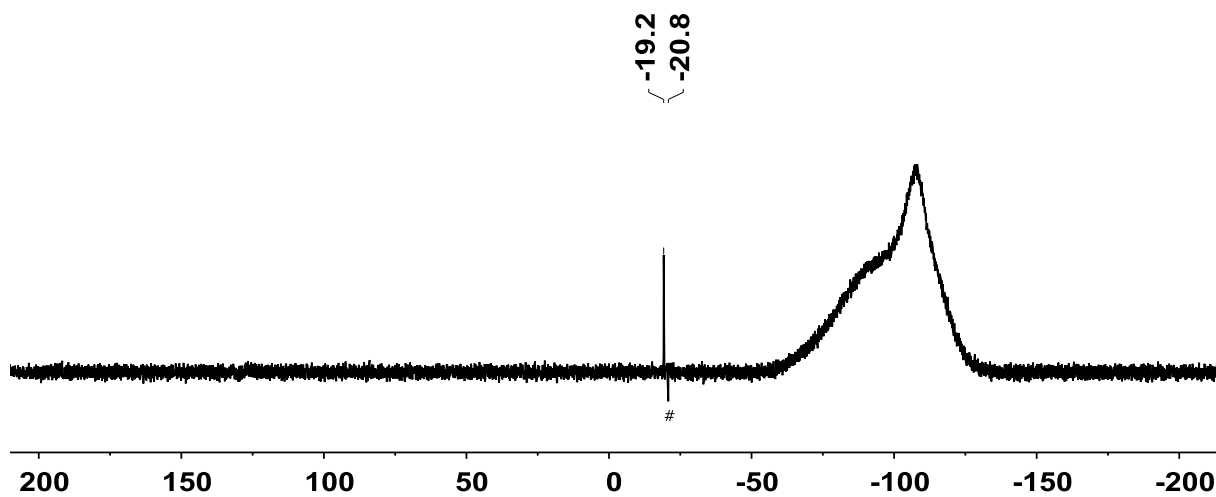

### 1.3. Syntheses of Nitrilium Ions

#### General Procedure A

A Schlenk tube was charged with the corresponding silane and trityl borate  $[\text{Ph}_3\text{C}][\text{B}(\text{C}_6\text{F}_5)_4]$  and the solids were dissolved in benzene. The reaction mixture was stirred at r.t. for 20 min. Then, the phases were separated, the upper, nonpolar phase was removed and the polar phase was washed twice with benzene. After removing the solvent under reduced pressure, 4-fluorobenzonitrile was dissolved in 0.6 mL deuterated methylene chloride or deuterated benzene and added to the residue. Afterwards, the reaction mixture was stirred for further 15 min and subsequently transferred to a NMR tube for analysis.

#### General procedure B

Trityl borate  $[\text{Ph}_3\text{C}][\text{B}(\text{C}_6\text{F}_5)_4]$  and 4-fluorobenzonitrile were dissolved in dichloromethane- $d_2$ . This solution was added to a solution of the corresponding silane in dichloromethane- $d_2$ . The reaction mixture was stirred for 5 min and subsequently transferred to a NMR tube for analysis.

#### General Procedure C

In a Schlenk tube the corresponding silane and trityl borate  $[\text{Ph}_3\text{C}][\text{B}(\text{C}_6\text{F}_5)_4]$  were dissolved in benzene- $d_6$  and stirred for 30 min. After the biphasic reaction mixture was analyzed by NMR spectroscopy, the nonpolar phase was removed. The polar phase was first washed with a mixture of benzene and pentane and then with pentane. After removing the solvent under reduced pressure, the residue was dissolved in dichloromethane- $d_2$ . To this solution 4-fluorobenzonitrile was added and the reaction mixture was stirred for 10 min and after that analyzed by NMR spectroscopy.

## Phenoxy substituted derivatives

Nitrilium borate **10a** $[\text{B}(\text{C}_6\text{F}_5)_4]^-$  was synthesized according to general procedure **A** using 1.0 equiv. 6-phenoxy-5-dimethylsilylacenaphthene (379.46  $\mu\text{mol}$ , 116 mg), 1.0 equiv. trityl borate (379.46  $\mu\text{mol}$ , 349 mg) and 1.0 equiv. 4-fluorobenzonitrile (379.46  $\mu\text{mol}$ , 46 mg) (NMR spectroscopy in benzene- $d_6$ ) or general procedure **B** using 1.0 equiv. 5-dimethylsilyl-6-phenoxyacenaphthen (132.36  $\mu\text{mol}$ , 40 mg), 1.0 equiv. tritylborate (132.36  $\mu\text{mol}$ , 122 mg) and 1.0 equiv. 4-fluorobenzonitrile (132.36  $\mu\text{mol}$ , 16 mg). Nitrilium ion **10a** decomposes in dichloromethane- $d_2$  within one day.

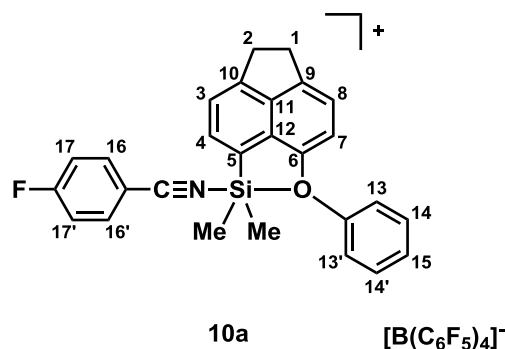

**$^1\text{H}$  NMR** (499.87 MHz, 305.1 K,  $\text{C}_6\text{D}_6$ ):  $\delta$  = 0.74 (s, 6 H,  $\text{Si}(\text{CH}_3)_2$ ), 3.03-3.05 (m, 2 H,  $\text{CH}_2$ , H-1), 3.16-3.18 (m, 2H,  $\text{CH}_2$ , H-2), 6.58-6.64 (m, 3 H, H-17, H-17', H-7), 6.89-6.91 (m, 2 H, H-13, H-13'), 6.92-6.96 (m, 3 H, H-16, H-16', H-8), 7.00-7.05 (m, 1 H, H-15), 7.14-7.19 (m, 2 H, H-14, H-14'), 7.31 (d,  $^3J_{\text{H,H}} = 7.2$  Hz, 1 H, H-3), 7.72 (d,  $^3J_{\text{H,H}} = 7.1$  Hz, 1 H, H-4).  **$^{13}\text{C}\{^1\text{H}\}$  NMR** (125.71 MHz, 305.0 K,  $\text{C}_6\text{D}_6$ ):  $\delta$  = 0.8 ( $\text{Si}(\text{CH}_3)_2$ ), 29.7 ( $\text{CH}_2$ ), 31.3 ( $\text{CH}_2$ ), 98.4 ( $\underline{\text{C}}\text{-CN}$ ), 113.0 (C-7), 115.5 (C-5), 118.3 (d,  $^2J_{\text{C,F}} = 23.5$  Hz, C-17, C-17'), 120.5, 120.6 (C-3, C-8), 121.0 (C-13, C-13'), 122.0 (CN), 123.9-126.0 (C,  $[\text{B}(\text{C}_6\text{F}_5)_4]^-$ ), 126.3 (C-15), 126.9 (C-12), 131.0 (C-14, C-14'), 136.4 (C-4), 137.0 (dm,  $^1J_{\text{C,F}} = 233.2$  Hz, CF,  $[\text{B}(\text{C}_6\text{F}_5)_4]^-$ ), 137.7 (d,  $^3J_{\text{C,F}} = 11.2$  Hz, C-16, C-16'), 138.9 (dm,  $^1J_{\text{C,F}} = 232.6$  Hz, CF,  $[\text{B}(\text{C}_6\text{F}_5)_4]^-$ ), 140.8 (C-11), 142.0 (C-9), 149.0 (d,  $^1J_{\text{C,F}} = 239.0$  Hz, CF,  $[\text{B}(\text{C}_6\text{F}_5)_4]^-$ ), 151.2 (C-6), 152.9 (C-10), 154.2 (C, C-Ph), 168.7 (d,  $^1J_{\text{C,F}} = 268.3$  Hz, CF).  **$^{19}\text{F}\{^1\text{H}\}$  NMR** (470.30 MHz, 305.0 K,  $\text{C}_6\text{D}_6$ ): -167.5-(-167.3) (m, 8 F, *m*-F,  $[\text{B}(\text{C}_6\text{F}_5)_4]^-$ ), -163.44 (t,  $^3J_{\text{F,F}} = 20.5$  Hz, 4 F, *p*-F,  $[\text{B}(\text{C}_6\text{F}_5)_4]^-$ ), -133.0-(-132.8) (m, 8 F, *o*-F,  $[\text{B}(\text{C}_6\text{F}_5)_4]^-$ ), -89.8 (s, 1 F, CF).  **$^{29}\text{Si}\{^1\text{H}\}$  NMR** (99.31 MHz, 305.0 K,  $\text{C}_6\text{D}_6$ ):  $\delta$  = 15.4.  **$^{11}\text{B}\{^1\text{H}\}$  NMR** (160.38 MHz, 305.1 K,  $\text{C}_6\text{D}_6$ ):  $\delta$  = -16.1.

**$^1\text{H}$  NMR** (499.87 MHz, 305.1 K,  $\text{CD}_2\text{Cl}_2$ ):  $\delta = 1.08$  (s, 6 H,  $\text{Si}(\text{CH}_3)_2$ ), 3.44-3.46 (m, 2 H,  $\text{CH}_2$ , H-1), 3.54-3.56 (m, 2H,  $\text{CH}_2$ , H-2), 6.84 (d,  $^3J_{\text{H,H}} = 7.7$  Hz, 1 H, H-7), 7.18-7.20, 7.24-7.29, 7.31-7.37 (3 m, 19 H, H-8, CH-Ph,  $\text{Ph}_3\text{CH}$ ), 7.42-7.46 (m, 2H, H-17, H-17'), 7.49-7.53 (m, 3 H, H-3, CH-Ph), 7.94 (d,  $^3J_{\text{H,H}} = 7.0$  Hz, 1 H, H-4), 8.00-8.03 (m, 2 H, H-16).  **$^{19}\text{F}\{^1\text{H}\}$  NMR** (470.28 MHz, 305.1 K,  $\text{CD}_2\text{Cl}_2$ ):  $\delta = -167.4$ -(-167.2) (m, 8 F, *m*-F,  $[\text{B}(\text{C}_6\text{F}_5)_4]^-$ ), -163.44 (t,  $^3J_{\text{F,F}} = 20.5$  Hz, 4 F, *p*-F,  $[\text{B}(\text{C}_6\text{F}_5)_4]^-$ ), -133.0-(-132.9) (m, 8 F, *o*-F,  $[\text{B}(\text{C}_6\text{F}_5)_4]^-$ ), -87.9 (s, 1 F,  $^1J(\text{CF}) = 269.1$  Hz).  **$^{29}\text{Si}\{^1\text{H}\}$  NMR** (99.31 MHz, 305.0 K,  $\text{CD}_2\text{Cl}_2$ ):  $\delta = 16.3$ .

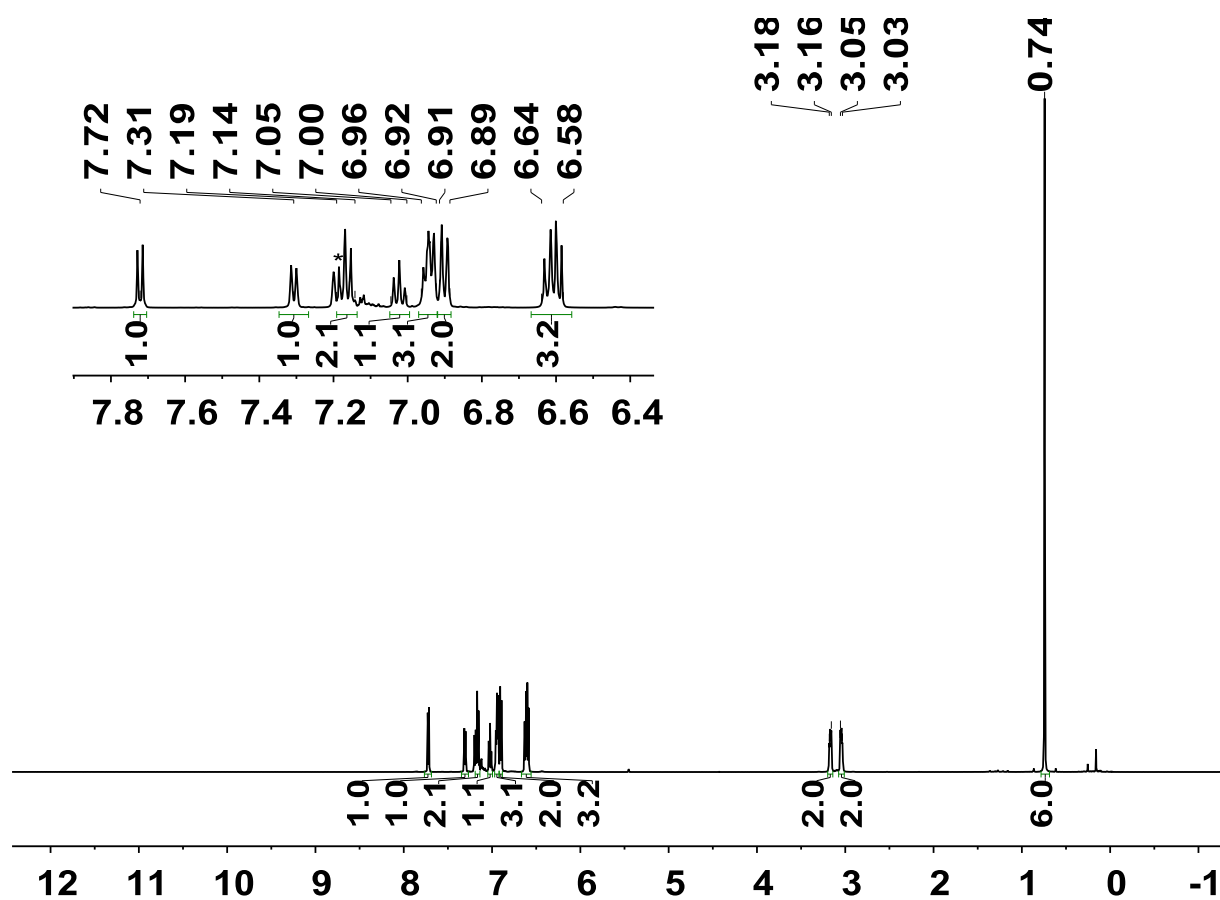

Figure S7 –  $^1\text{H}$  NMR spectrum (499.87 MHz, 305.1 K,  $\text{C}_6\text{D}_6$ , lb: 0.3 Hz,  $^*\text{C}_6\text{D}_5\text{H}$ ) of  $10\text{a}[\text{B}(\text{C}_6\text{F}_5)_4]$ .

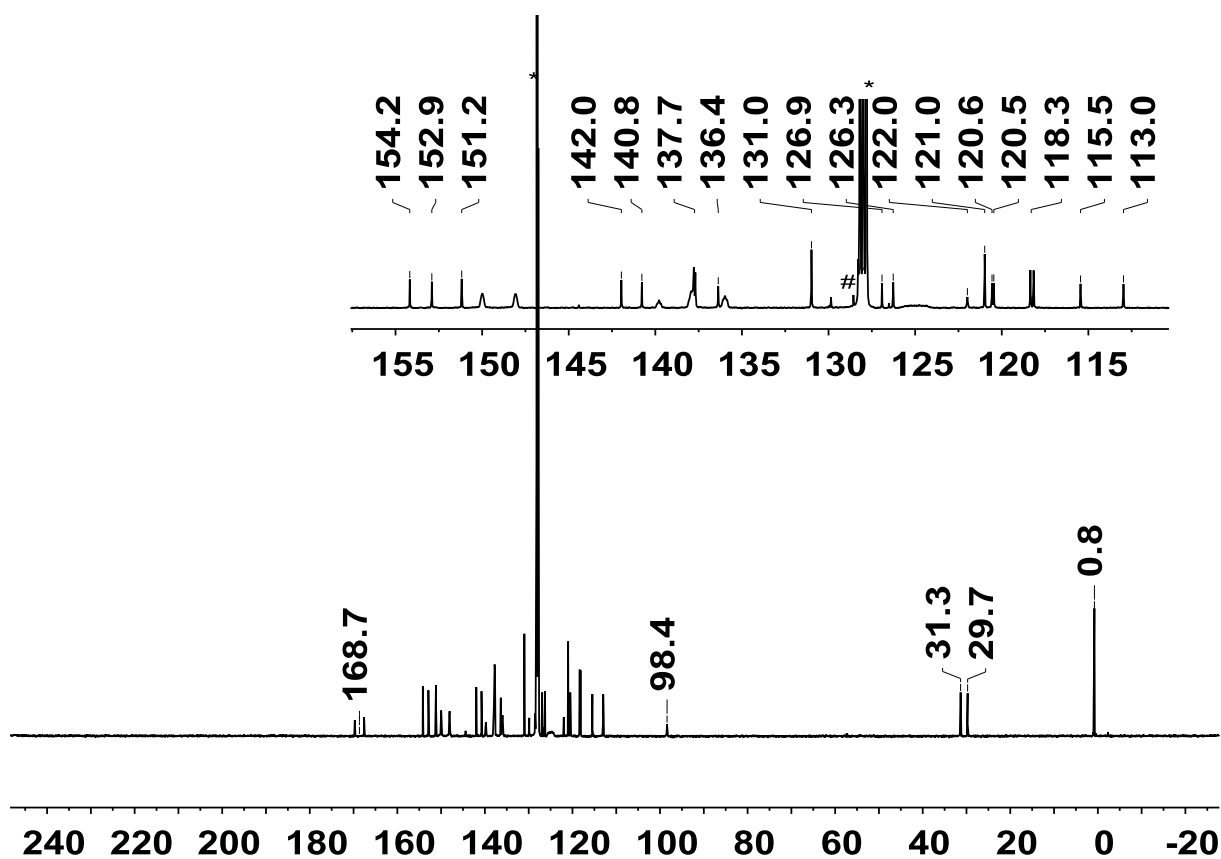

Figure S8 –  $^{13}\text{C}\{^1\text{H}\}$  NMR spectrum (125.71 MHz, 305.0 K,  $\text{C}_6\text{D}_6$ ,  $^*\text{C}_6\text{D}_6$ ,  $\# \text{Ph}_3\text{CH}$ ) of  $10\text{a}[\text{B}(\text{C}_6\text{F}_5)_4]$ .

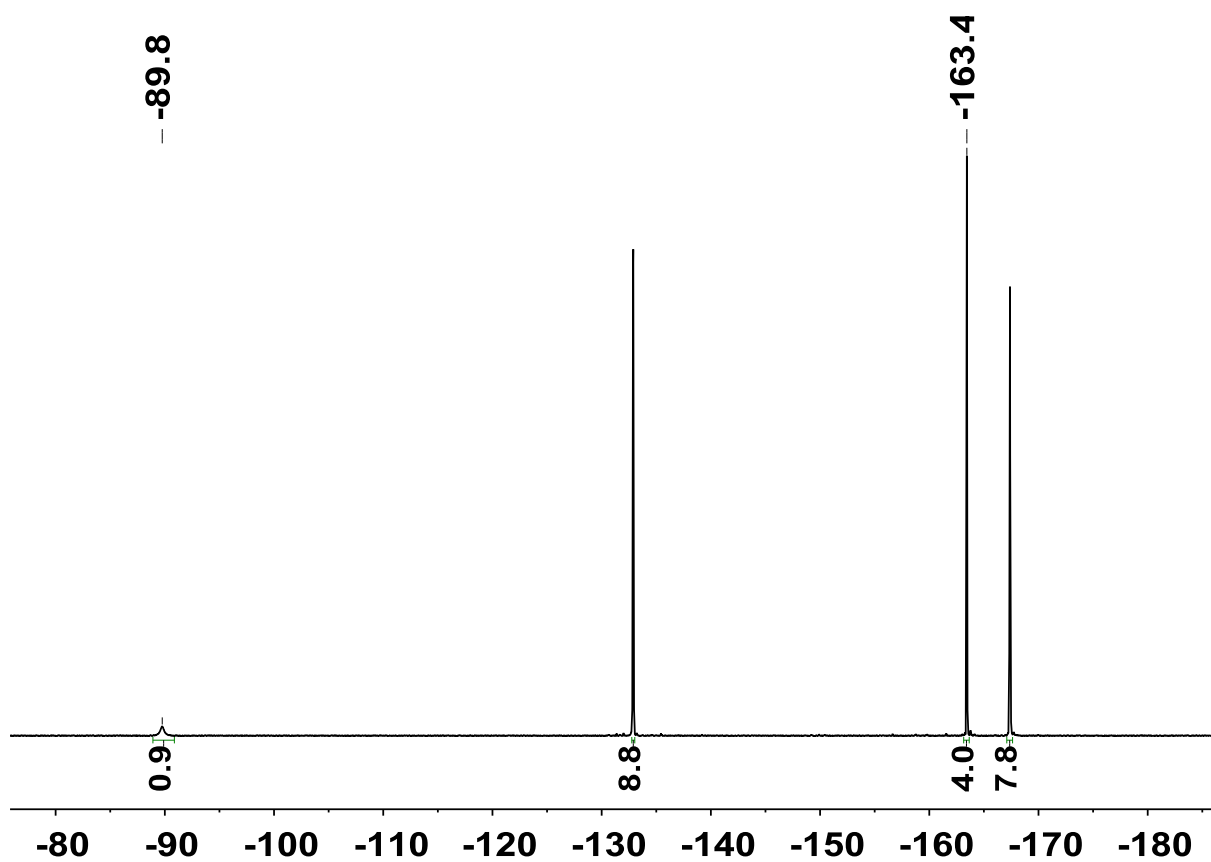

Figure S9 –  $^{19}\text{F}\{^1\text{H}\}$  NMR spectrum (470.30 MHz, 305.0 K,  $\text{C}_6\text{D}_6$ ) of  $10\text{a}[\text{B}(\text{C}_6\text{F}_5)_4]$ .

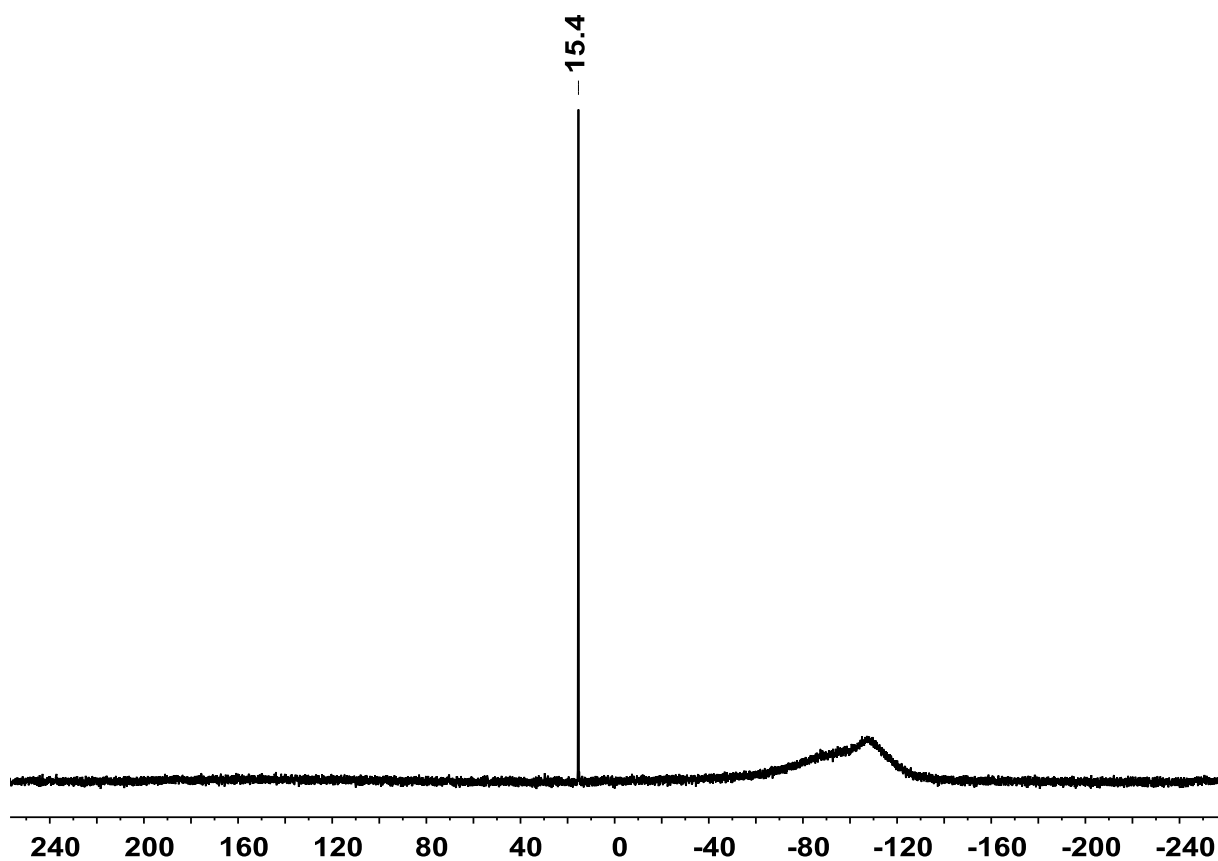

Figure S10 –  $^{29}\text{Si}\{^1\text{H}\}$  NMR spectrum (99.31 MHz, 305.0 K,  $\text{C}_6\text{D}_6$ ) of  $10\text{a}[\text{B}(\text{C}_6\text{F}_5)_4]$ .

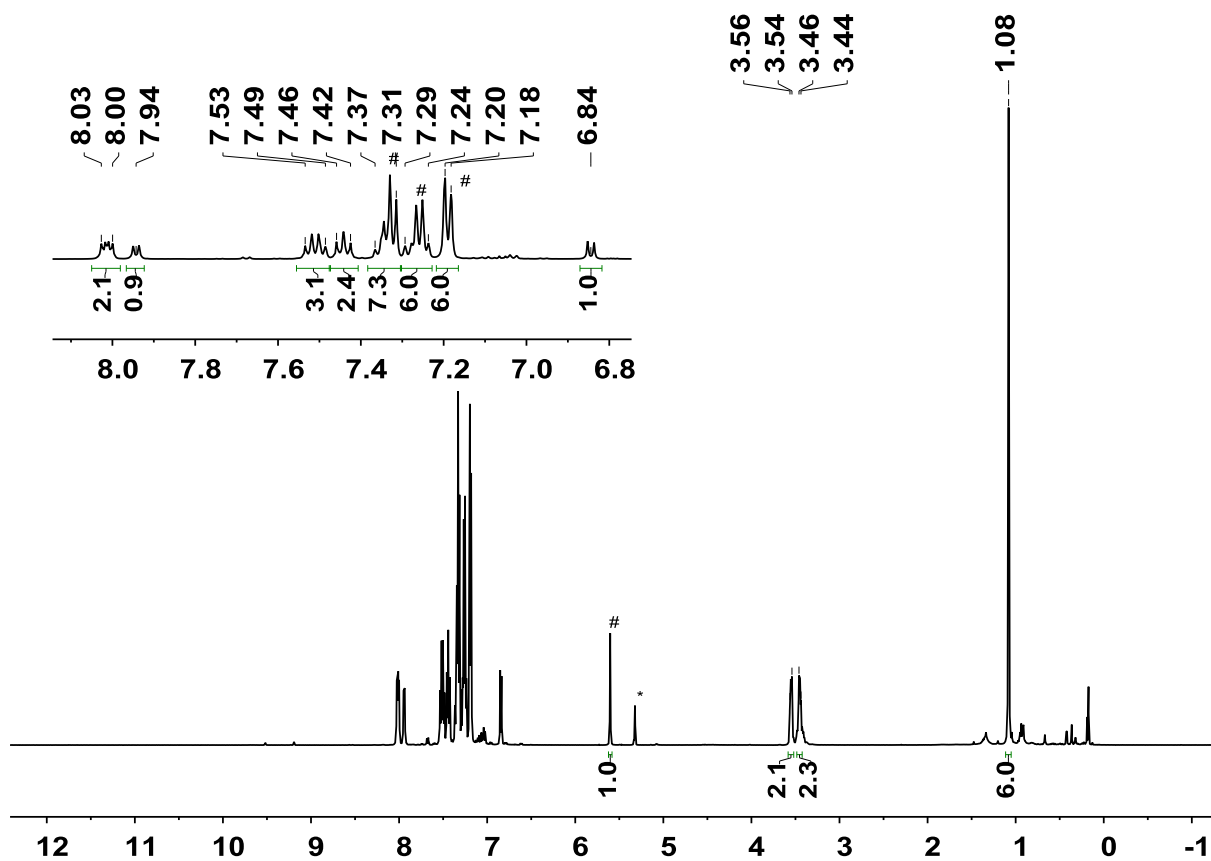

Figure S11 –  $^1\text{H}$  NMR spectrum (499.87 MHz, 305.1 K,  $\text{CD}_2\text{Cl}_2$ , lb: 0.3 Hz,  $^*\text{CDHCl}_2$ ,  $\# \text{Ph}_3\text{CH}$ ) of  $10\text{a}[\text{B}(\text{C}_6\text{F}_5)_4]$ .

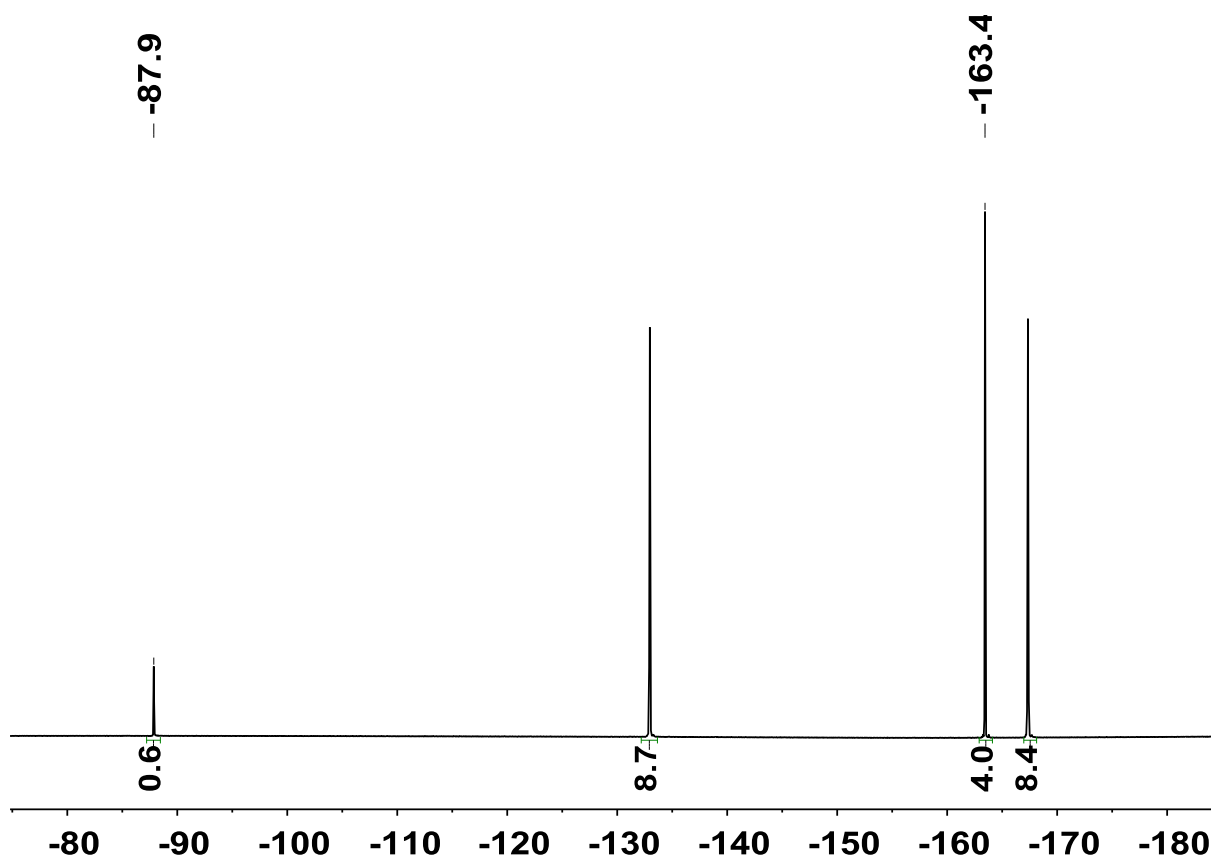

Figure S12 –  $^{19}\text{F}\{^1\text{H}\}$  NMR spectrum (470.28 MHz, 305.1 K,  $\text{CD}_2\text{Cl}_2$ ) of  $10\text{a}[\text{B}(\text{C}_6\text{F}_5)_4]$ .

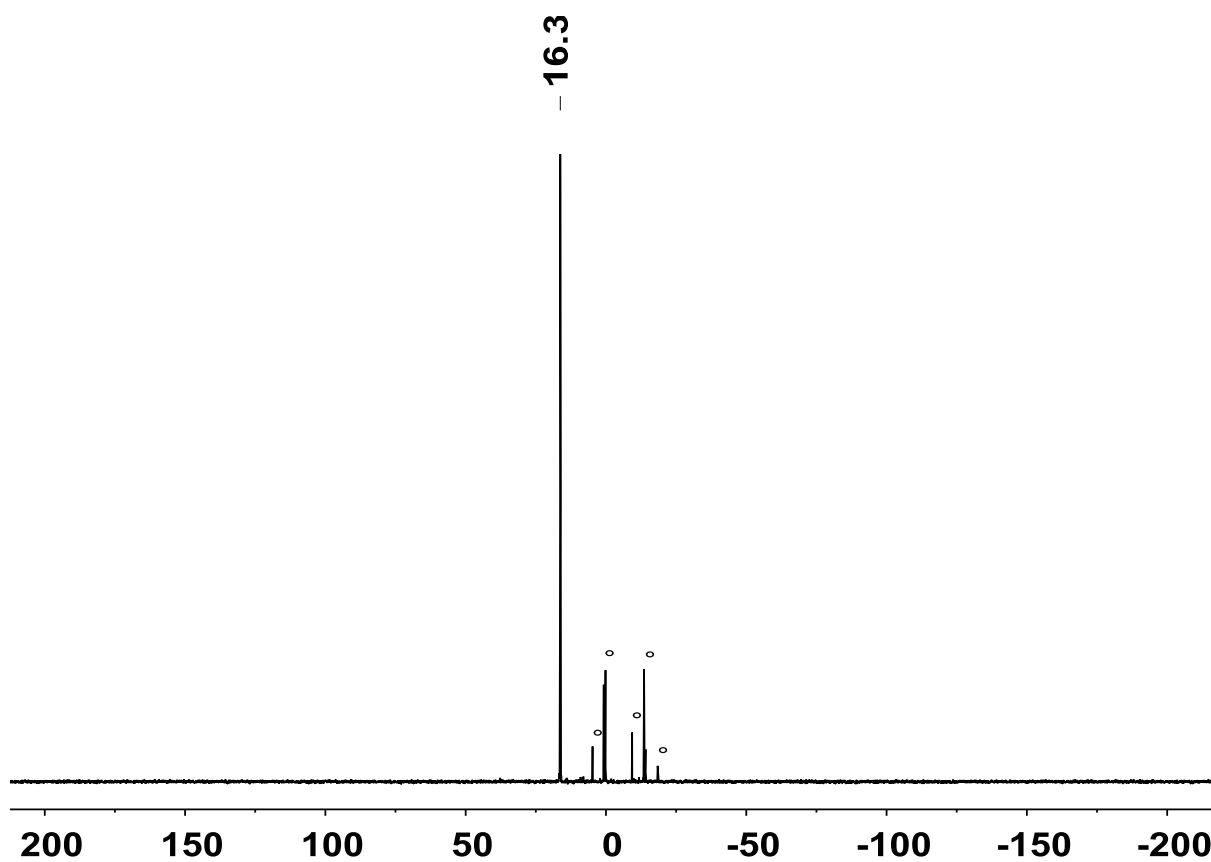

Figure S13 –  $^{29}\text{Si}\{^1\text{H}\}$  INEPT NMR spectrum (99.31 MHz, 305.0 K,  $\text{CD}_2\text{Cl}_2$ ,  $D_3 = 0.0084$ ,  $D_4 = 0.0313$ , ° decomposition) of  $10\text{a}[\text{B}(\text{C}_6\text{F}_5)_4]$ .



Nitrilium borate **11a**[B(C<sub>6</sub>F<sub>5</sub>)<sub>4</sub>] was synthesized according to general procedure **A** using 1.0 equiv. 8-phenoxy-1-dimethylsilylnaphthalene (251.41 μmol, 70 mg), 1.0 equiv. trityl borate (251.41 μmol, 230 mg) and 1.0 equiv. 4-fluorobenzonitrile (251.41 μmol, 30 mg).

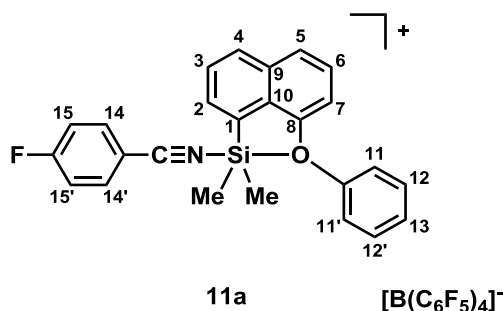

**<sup>1</sup>H NMR** (499.87 MHz, 305.0 K, CD<sub>2</sub>Cl<sub>2</sub>) δ = 1.07 (s, 6 H, Si(CH<sub>3</sub>)<sub>2</sub>), 6.70 (d, <sup>3</sup>J<sub>H,H</sub> = 7.8 Hz, 1 H, H-7), 7.35-7.37 (m, 2 H, H-11, H-11'), 7.39-7.43 (m, 3 H, H-15, H-15'), 7.47 (t, <sup>3</sup>J<sub>H,H</sub> = 8.0 Hz, 1 H, H-6), 7.52 (t, <sup>3</sup>J<sub>H,H</sub> = 7.5 Hz, 1 H, H-13), 7.65 (t, <sup>3</sup>J<sub>H,H</sub> = 7.9 Hz, 2 H, H-12, H-12'), 7.70-7.76 (m, 2 H, H-4, H-5), 8.04-8.06 (m, 3 H, H-14, H-14'), 8.12 (d, <sup>3</sup>J<sub>H,H</sub> = 7.0 Hz, 1 H, H-3), 8.18 (d, <sup>3</sup>J<sub>H,H</sub> = 8.3 Hz, 1 H, H-2).

**<sup>13</sup>C{<sup>1</sup>H} NMR** (125.71 MHz, 305.0 K, CD<sub>2</sub>Cl<sub>2</sub>) δ = 2.6 (Si(CH<sub>3</sub>)<sub>2</sub>), 103.1 (C-CN), 109.5 (C-7), 118.8 (d, <sup>2</sup>J<sub>C,F</sub> = 23.3 Hz, C-15, C-15'), 120.9 (CN), 121.9 (C-1), 123.2 (C-11, C-11'), 123.7 – 125.7 (brm, [B(C<sub>6</sub>F<sub>5</sub>)<sub>4</sub>], C), 124.3 (C-4/C-5), 127.4, 127.6, 128.4 (C-6, C-4/C-5, C-13), 128.9 (C-9/C-10), 131.8 (C-12, C-12'), 132.7 (C-2), 134.8 (C-3), 134.9 (C-9/C-10), 136.9 (d, <sup>1</sup>J<sub>C,F</sub> = 243.5 Hz, [B(C<sub>6</sub>F<sub>5</sub>)<sub>4</sub>], CF), 137.6 (d, <sup>3</sup>J<sub>C,F</sub> = 10.2 Hz, C-14, C-14'), 138.9 (d, <sup>1</sup>J<sub>C,F</sub> = 244.1 Hz, [B(C<sub>6</sub>F<sub>5</sub>)<sub>4</sub>], CF), 148.8 (d, <sup>1</sup>J<sub>C,F</sub> = 241.0 Hz, [B(C<sub>6</sub>F<sub>5</sub>)<sub>4</sub>], CF), 152.3 (C-Ph), 154.4 (C-8), 168.3 (d, <sup>1</sup>J<sub>C,F</sub> = 264.4 Hz, CF).

**<sup>29</sup>Si{<sup>1</sup>H} NMR** (99.31 MHz, 305.0 K, CD<sub>2</sub>Cl<sub>2</sub>) δ = 1.6. **<sup>19</sup>F{<sup>1</sup>H} NMR** (470.30 MHz, 233.1 K, CD<sub>2</sub>Cl<sub>2</sub>) δ = -166.9(-166.7) (m, 8 F, [B(C<sub>6</sub>F<sub>5</sub>)<sub>4</sub>]), -162.87 (t, <sup>3</sup>J<sub>F,F</sub> = 21.0 Hz, 4 F, [B(C<sub>6</sub>F<sub>5</sub>)<sub>4</sub>]), -133.6(-133.3) (m, 9 F, [B(C<sub>6</sub>F<sub>5</sub>)<sub>4</sub>]), -102.6 (s, 0.5 F), -90.2 (s, 1 F, <sup>1</sup>J(CF) = 267.7 Hz). **<sup>11</sup>B{<sup>1</sup>H} NMR** (160.38 MHz, 305.1 K, CD<sub>2</sub>Cl<sub>2</sub>) δ = -16.6.

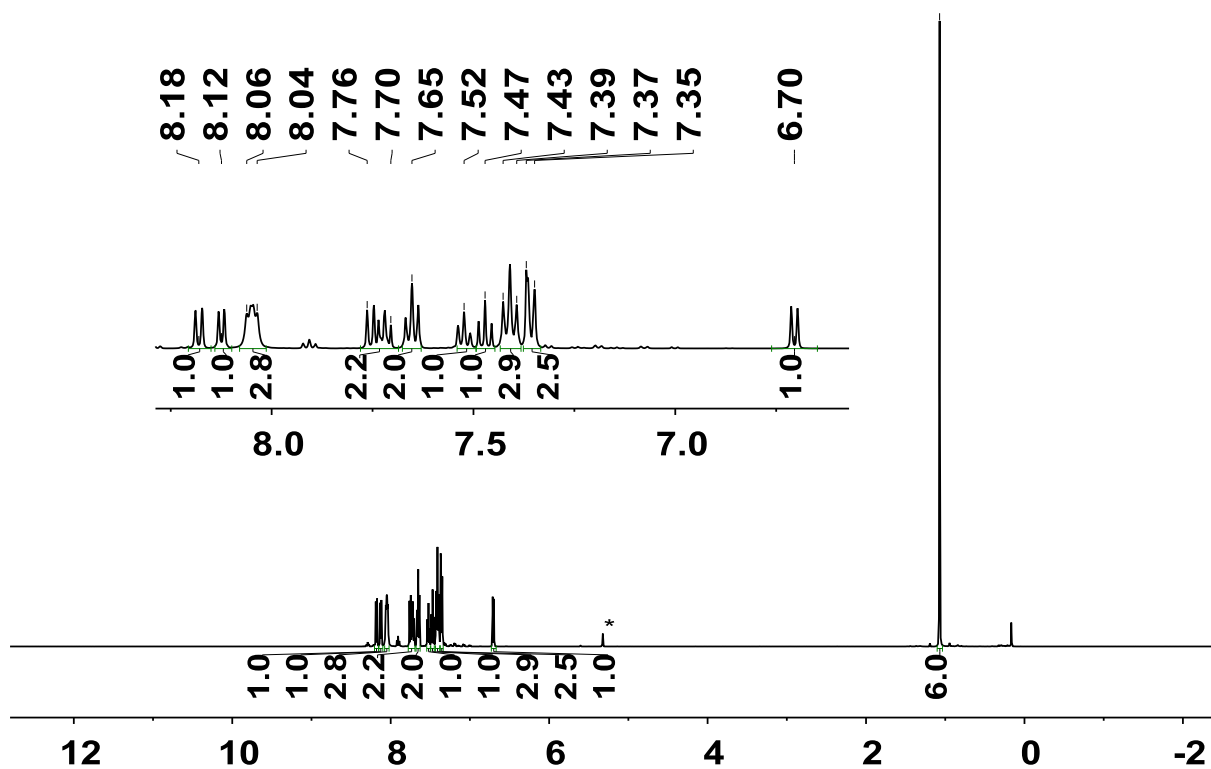

Figure S14 –  $^1\text{H}$  NMR spectrum (499.87 MHz, 305.0 K,  $\text{CD}_2\text{Cl}_2$ ,  $^*\text{CDHCl}_2$ ) of  $11\text{a}[\text{B}(\text{C}_6\text{F}_5)_4]$ .

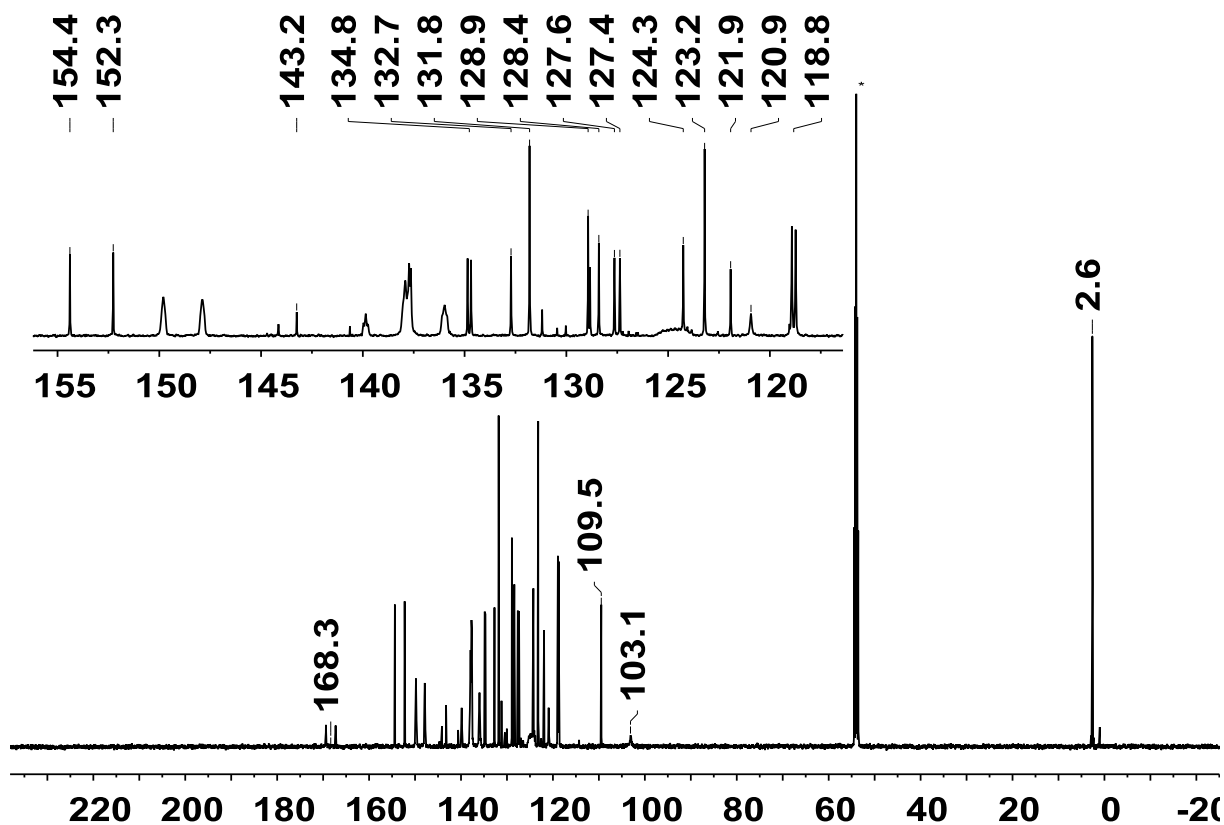

Figure S15 –  $^{13}\text{C}\{^1\text{H}\}$  NMR spectrum (125.71 MHz, 305.0 K,  $\text{CD}_2\text{Cl}_2$ ) of  $11\text{a}[\text{B}(\text{C}_6\text{F}_5)_4]$ .

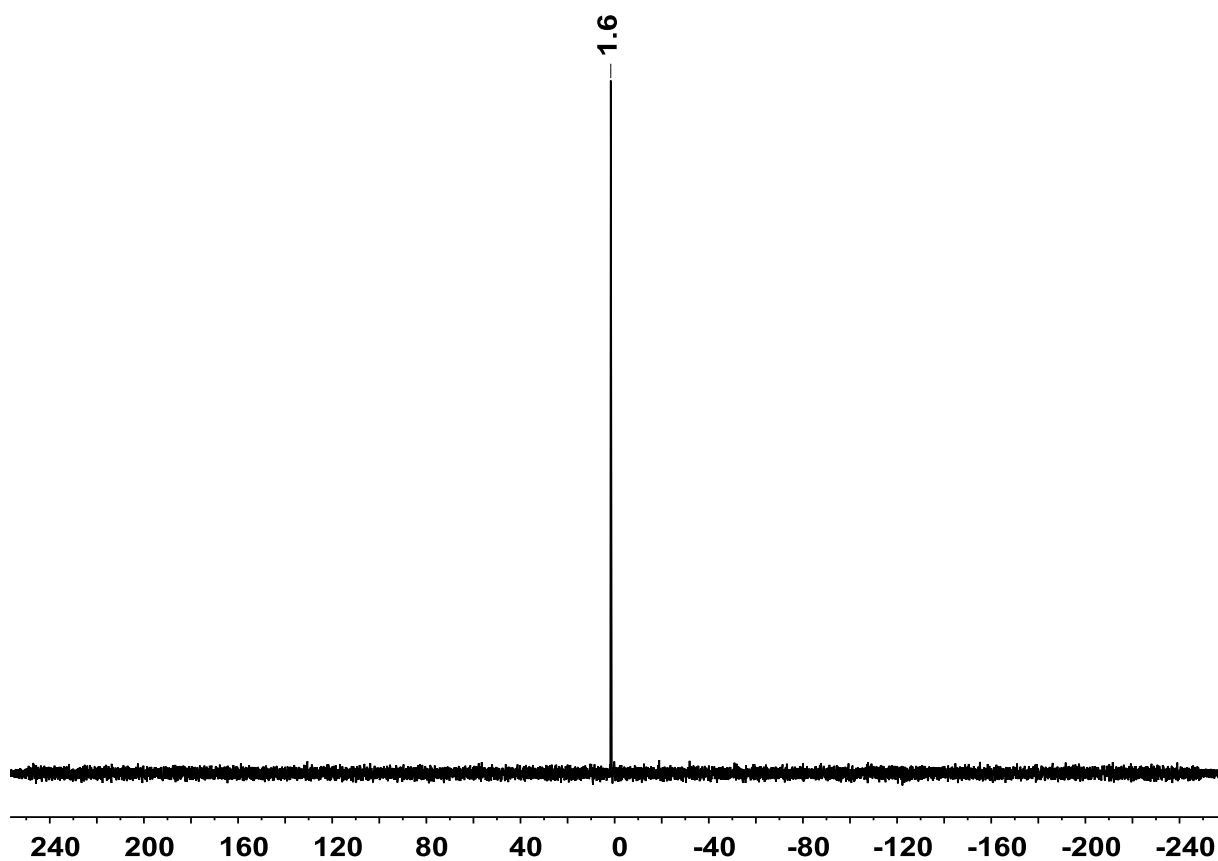

Figure S16 –  $^{29}\text{Si}\{^1\text{H}\}$  NMR spectrum (99.31 MHz, 305.0 K,  $\text{CD}_2\text{Cl}_2$ ) of  $11\text{a}[\text{B}(\text{C}_6\text{F}_5)_4]$ .

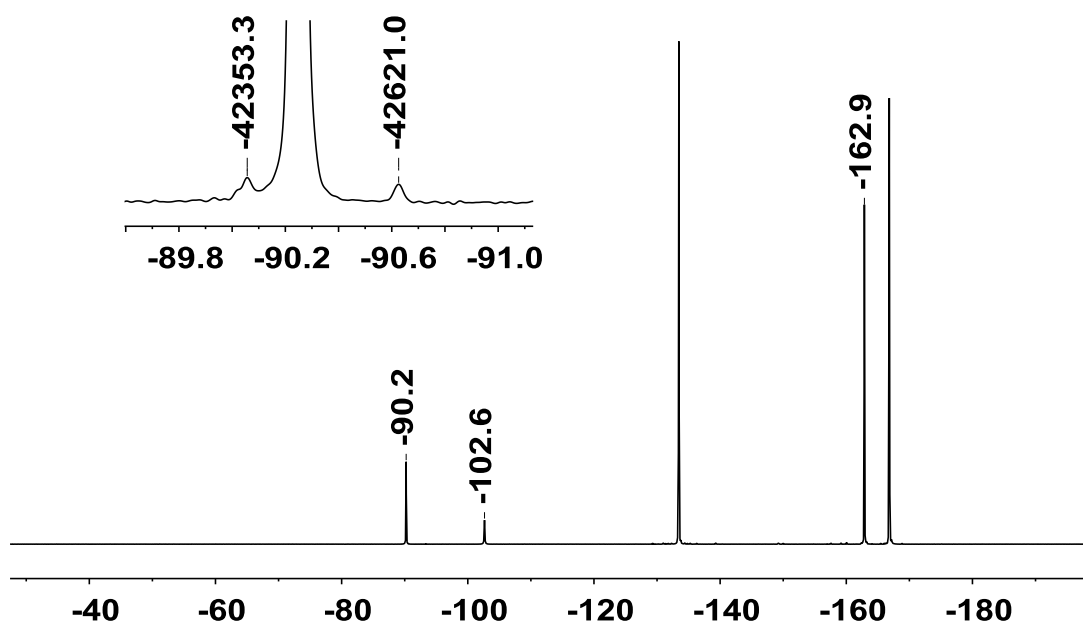

Figure S17 –  $^{19}\text{F}\{^1\text{H}\}$  NMR spectrum (470.30 MHz, 233.1 K,  $\text{CD}_2\text{Cl}_2$ ) of  $11\text{a}[\text{B}(\text{C}_6\text{F}_5)_4]$ .

### Thiophenyl substituted derivative

The nitrilium borate **10b** $[\text{B}(\text{C}_6\text{F}_5)_4]$  was synthesized according to general procedure **A** using 1.0 equiv. 6-dimethylsilyl-5-thiophenylacenaphthene (75 mg, 233.99  $\mu\text{mol}$ ), 1.0 equiv. trityl borate (215 mg, 233.99  $\mu\text{mol}$ ) and 1.0 equiv. 4-fluorobenzonitrile (28 mg, 233.99  $\mu\text{mol}$ ).

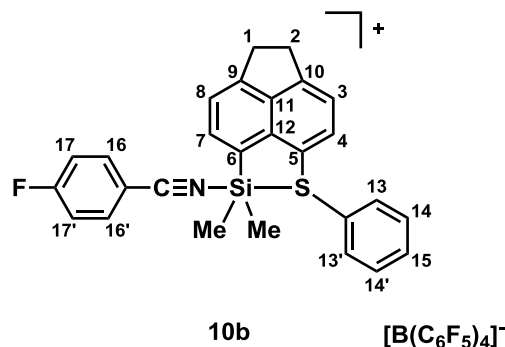

**$^1\text{H}$  NMR** (499.87 MHz, 298.7 K,  $\text{CD}_2\text{Cl}_2$ ):  $\delta$  = 0.95 (s, 6 H,  $\text{Si}(\text{CH}_3)_2$ ), 3.58-3.64 (m, 4 H,  $2 \times \text{CH}_2$ ), 7.04-7.07 (m, 2 H, H-13, H13'), 7.38-7.43 (m, 4 H, H-14, H-14', H-17, H-17'), 7.44-7.48 (m, 1 H, H-15), 7.60-7.64 (m, 2 H, H-3, H-8), 7.95 (d,  $^3J_{\text{H,H}} = 7.4$  Hz, 1 H, H-4), 8.00-8.02 (m, 2 H, H-16, H-16'), 8.14 (d,  $^3J_{\text{H,H}} = 7.1$  Hz, 1 H, H-7).  **$^{13}\text{C}\{^1\text{H}\}$  NMR** (125.71 MHz, 298.7 K,  $\text{CD}_2\text{Cl}_2$ ):  $\delta$  = 2.7 ( $\text{Si}(\text{CH}_3)_2$ ), 31.5 ( $\text{CH}_2$ ), 31.7 ( $\text{CH}_2$ ), 103.0 ( $\underline{\text{C}}-\text{CN}$ ), 118.8 (d,  $^2J_{\text{C,F}} = 23.4$  Hz, C-17, C-17'), 120.0, 120.1 (C, CN), 122.1 (C-6), 122.6, 122.9 (C-3, C-8), 128.8 (C-13, C-13'), 130.6 (C, C-Ph), 131.2 (C-14, C-14'), 135.8 (C-4), 136.9 (dm,  $^1J_{\text{C,F}} = 243.0$  Hz, CF,  $[\text{B}(\text{C}_6\text{F}_5)_4]^-$ ), 137.6 (d,  $^3J_{\text{C,F}} = 10.4$  Hz, C-16, C-16'), 138.8 (C-7), 138.9 (dm,  $^1J_{\text{C,F}} = 245.1$  Hz, CF,  $[\text{B}(\text{C}_6\text{F}_5)_4]^-$ ), 139.6 (C), 140.4 (C), 148.8 (dm,  $^1J_{\text{C,F}} = 242.0$  Hz, CF,  $[\text{B}(\text{C}_6\text{F}_5)_4]^-$ ), 153.2 (C), 153.6 (C), 168.3 (d,  $^1J_{\text{C,F}} = 264.0$  Hz, CF).  **$^{19}\text{F}\{^1\text{H}\}$  NMR** (470.28 MHz, 298.7 K,  $\text{CD}_2\text{Cl}_2$ ):  $\delta$  = -167.4-(-167.2) (m, 8 F, *m*-F,  $[\text{B}(\text{C}_6\text{F}_5)_4]^-$ ), -163.44 (t,  $^3J_{\text{F,F}} = 20.5$  Hz, 4 F, *p*-F,  $[\text{B}(\text{C}_6\text{F}_5)_4]^-$ ), -132.9-(-132.7) (m, 8 F, *o*-F,  $[\text{B}(\text{C}_6\text{F}_5)_4]^-$ ), -94.3 (s, 1 F, CF).  **$^{29}\text{Si}\{^1\text{H}\}$  NMR** (99.31 MHz, 298.7 K,  $\text{CD}_2\text{Cl}_2$ ):  $\delta$  = 29.5.  **$^{11}\text{B}\{^1\text{H}\}$  NMR** (160.38 MHz, 305.0 K,  $\text{CD}_2\text{Cl}_2$ ):  $\delta$  = -16.6.

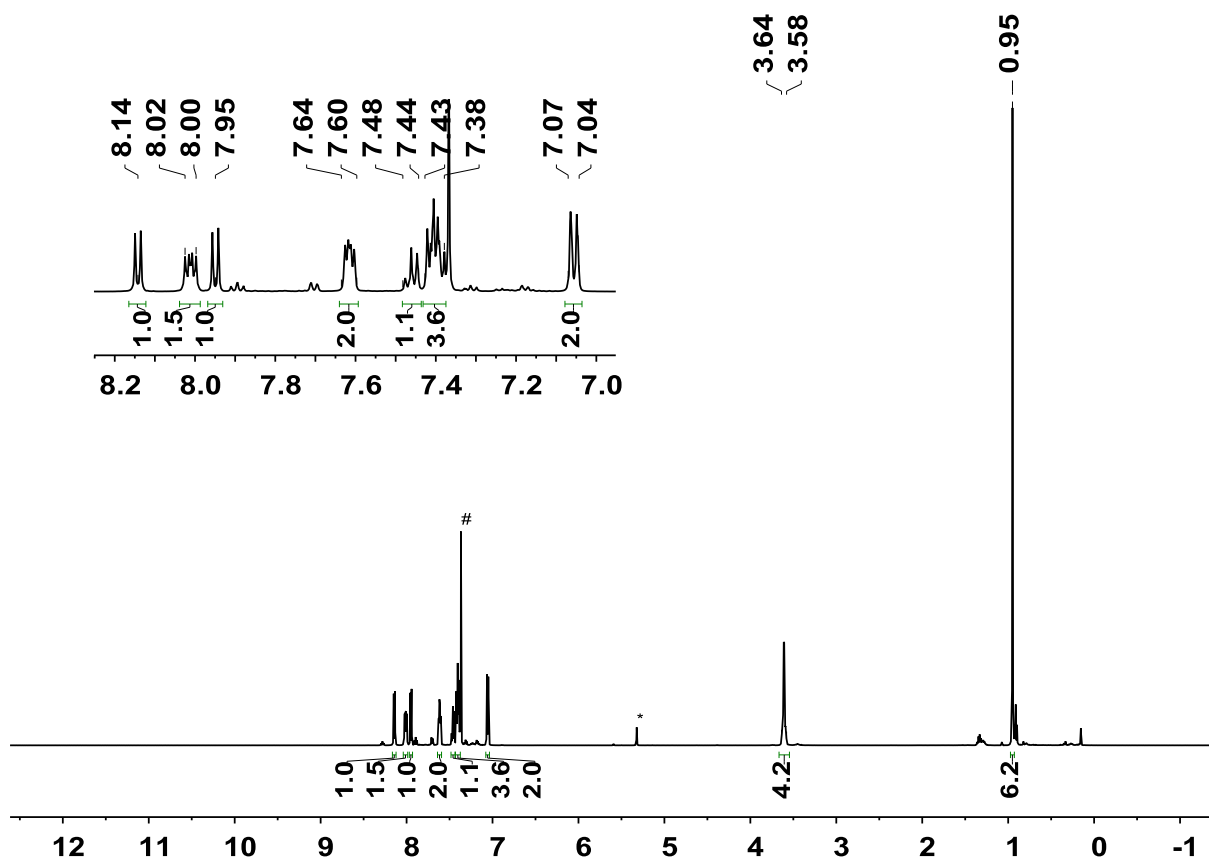

Figure S18 – <sup>1</sup>H NMR spectrum (499.87 MHz, 305.0 K, CD<sub>2</sub>Cl<sub>2</sub>, \*CDHCl<sub>2</sub>, #C<sub>6</sub>H<sub>6</sub>) of 10b[B(C<sub>6</sub>F<sub>5</sub>)<sub>4</sub>].

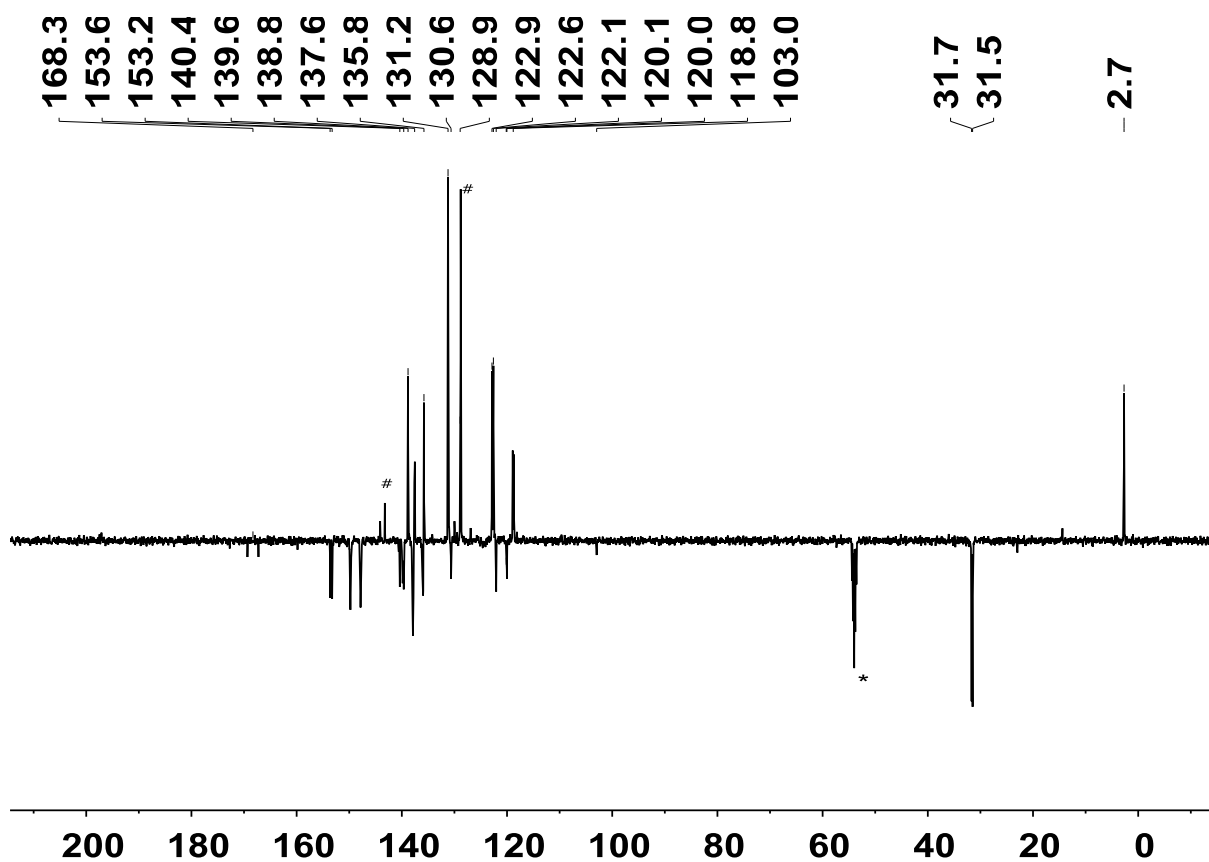

Figure S19 – <sup>13</sup>C{<sup>1</sup>H} APT NMR spectrum (125.71 MHz, 305.0 K, CD<sub>2</sub>Cl<sub>2</sub>, # C<sub>6</sub>H<sub>6</sub>, impurities) of 10b[B(C<sub>6</sub>F<sub>5</sub>)<sub>4</sub>].

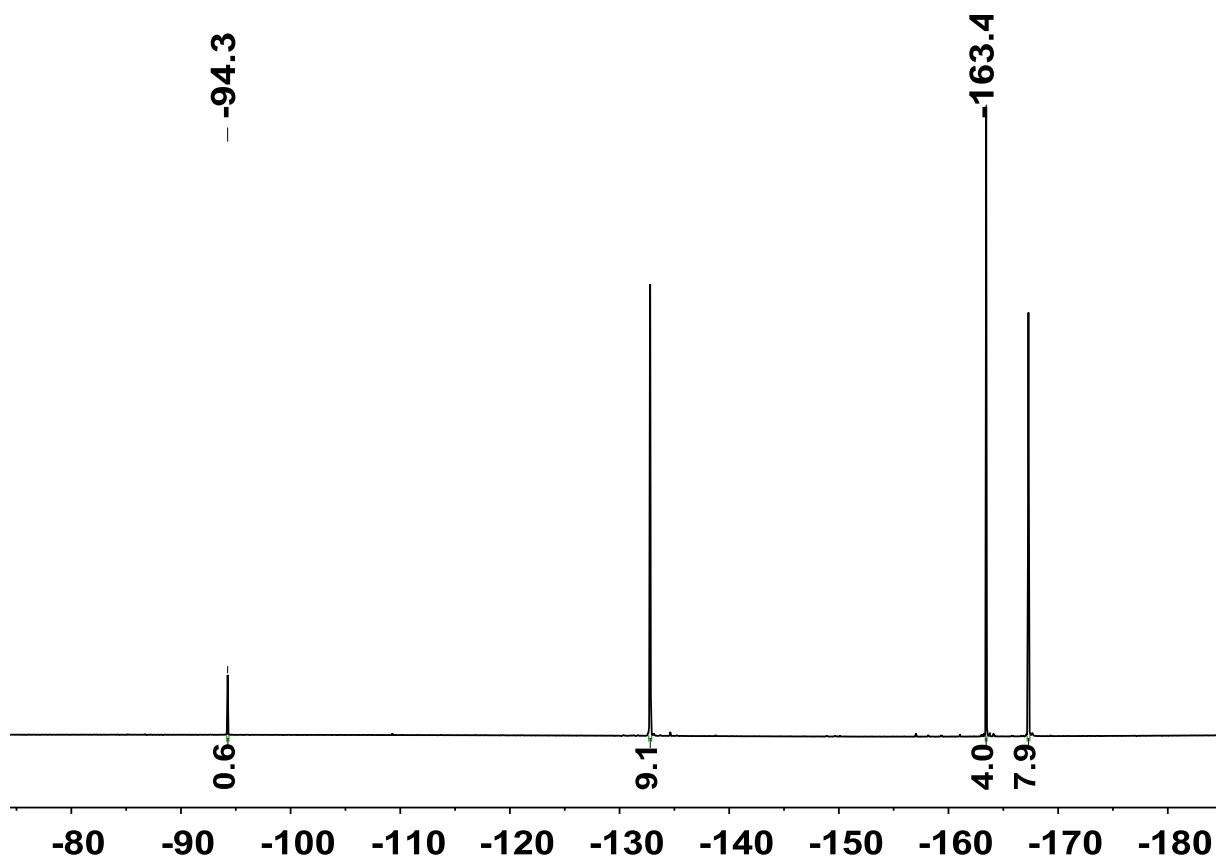

Figure S20 –  $^{19}\text{F}\{^1\text{H}\}$  NMR spectrum (470.30 MHz, 305.0 K,  $\text{CD}_2\text{Cl}_2$ ) of  $10\text{b}[\text{B}(\text{C}_6\text{F}_5)_4]$ .

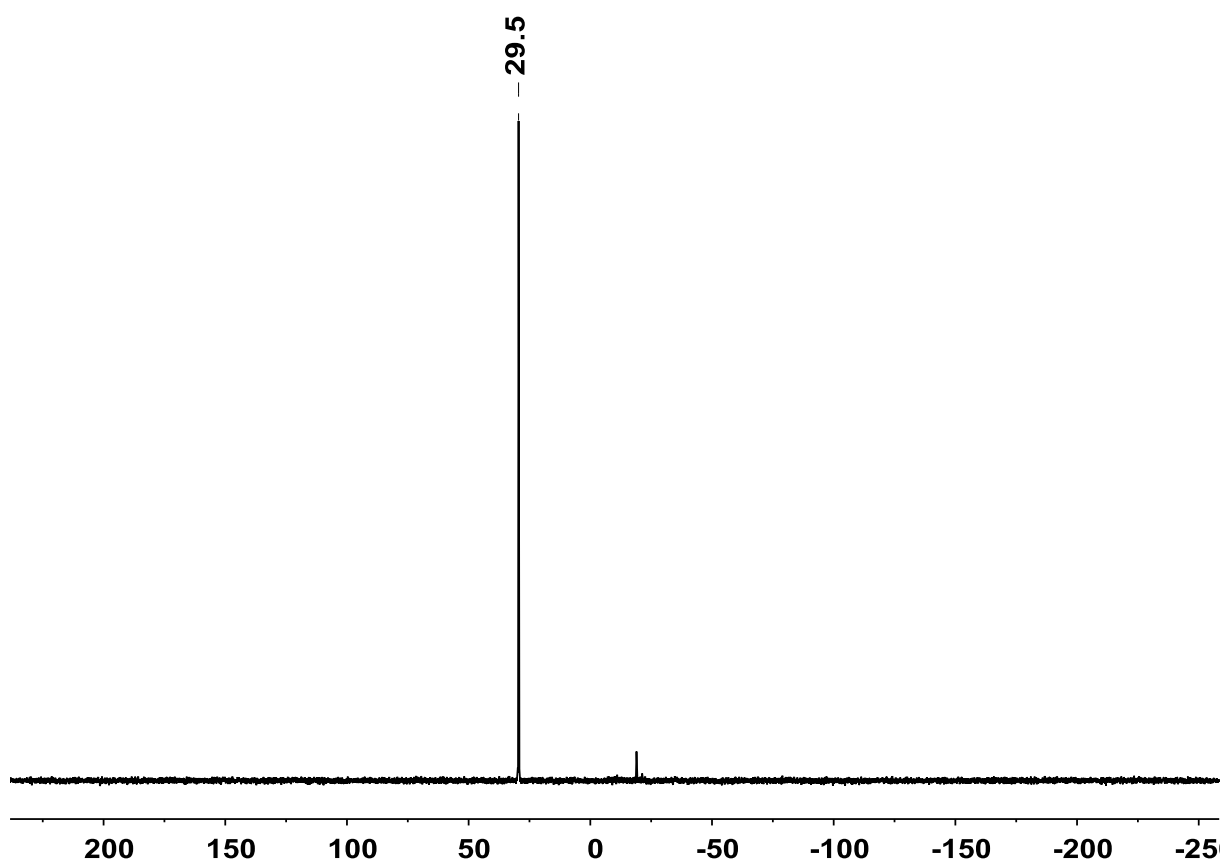

Figure S21 –  $^{29}\text{Si}\{^1\text{H}\}$  INEPT NMR spectrum (99.31 MHz, 305.0 K,  $\text{CD}_2\text{Cl}_2$ ) of  $10\text{b}[\text{B}(\text{C}_6\text{F}_5)_4]$ .

### Selenylphenyl substituted derivative

The nitrilium ion **10c**[B(C<sub>6</sub>F<sub>5</sub>)<sub>4</sub>]<sup>+</sup> was synthesized according to general procedure **C** using 1.0 equiv. 5-phenylselenyl-6-dimethylsilylacenaphthene **7c** (147 mg, 400 μmol), 1.0 equiv. trityl borate (369 mg, 400 μmol) and 1.0 equiv. 4-fluorobenzonitrile (49 mg, 400 μmol).

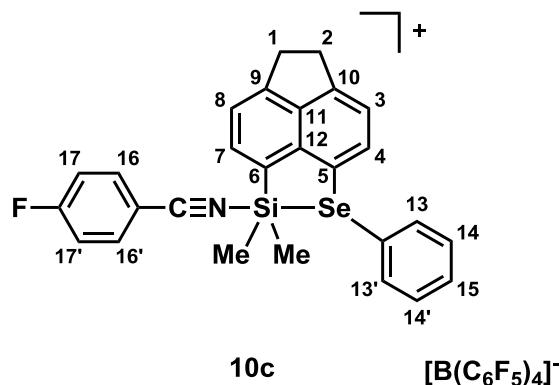

**<sup>1</sup>H NMR** (499.87 MHz, 305.1 K, CD<sub>2</sub>Cl<sub>2</sub>): δ = 1.08 (s, 6 H, Si(CH<sub>3</sub>)<sub>2</sub>), 3.59-3.65 (m, 4 H, 2 × CH<sub>2</sub>), 7.07 (d, <sup>3</sup>J<sub>H,H</sub> = 7.7 Hz, 2 H, H-13, H13'), 7.29-7.35 (m, 3 H, H-17, H-17'), 7.35-7.38 (m, 2 H, H-14, H-14'), 7.44 (t, <sup>3</sup>J<sub>H,H</sub> = 7.3 Hz, 1 H, H-15), 7.59-7.64 (m, 2 H, H-3, H-8), 7.86-7.92 (m, 3 H, H-16, H-16'), 8.05 (d, <sup>3</sup>J<sub>H,H</sub> = 7.3 Hz, 1 H, H-4), 8.21 (d, <sup>3</sup>J<sub>H,H</sub> = 7.1 Hz, 1 H, H-7). **<sup>13</sup>C{<sup>1</sup>H} NMR** (125.71 MHz, 305.0 K, CD<sub>2</sub>Cl<sub>2</sub>): δ = 3.5 (<sup>1</sup>J<sub>C,Si</sub> = 64.6 Hz, <sup>2</sup>J<sub>C,Se</sub> = 15.0 Hz, Si(CH<sub>3</sub>)<sub>2</sub>), 31.4 (CH<sub>2</sub>), 31.5 (CH<sub>2</sub>), 105.8 (d, <sup>4</sup>J<sub>C,F</sub> = 3.5 Hz, C-CN), 118.1 (d, <sup>2</sup>J<sub>C,F</sub> = 23.1 Hz, C-17, C-17'), 119.6 (CN), 120.6 (<sup>1</sup>J<sub>C,Se</sub> = 84.7 Hz, C-5), 122.4, 122.9 (C-3, C-8), 123.9-125.8 (brs, C, [B(C<sub>6</sub>F<sub>5</sub>)<sub>4</sub>]<sup>-</sup>), 124.9 (C-6), 129.1 (C, C-Ph), 129.5 (C-13, C-13'), 130.7 (C-15), 131.4 (C-14, C-14'), 136.6 (d, <sup>3</sup>J<sub>C,F</sub> = 10.0 Hz, C-16, C-16'), 137.1 (dm, <sup>1</sup>J<sub>C,F</sub> = 241.9 Hz, CF, [B(C<sub>6</sub>F<sub>5</sub>)<sub>4</sub>]<sup>-</sup>), 137.2 (C-4), 139.0 (dm, <sup>1</sup>J<sub>C,F</sub> = 245.8 Hz, CF, [B(C<sub>6</sub>F<sub>5</sub>)<sub>4</sub>]<sup>-</sup>), 139.3 (C-7), 140.5, 141.0 (C-11, C-12), 149.0 (d, <sup>1</sup>J<sub>C,F</sub> = 240.9 Hz, CF, [B(C<sub>6</sub>F<sub>5</sub>)<sub>4</sub>]<sup>-</sup>), 153.3, 153.4 (C-9, C-10), 167.2 (d, <sup>1</sup>J<sub>C,F</sub> = 260.2 Hz, CF). **<sup>19</sup>F{<sup>1</sup>H} NMR** (470.28 MHz, 305.0 K, CD<sub>2</sub>Cl<sub>2</sub>): δ = -167.4-167.2 (m, 8 F, *m*-F, [B(C<sub>6</sub>F<sub>5</sub>)<sub>4</sub>]<sup>-</sup>), -163.44 (t, <sup>3</sup>J<sub>F,F</sub> = 20.5 Hz, 4 F, *p*-F, [B(C<sub>6</sub>F<sub>5</sub>)<sub>4</sub>]<sup>-</sup>), -132.9-(-132.7) (m, 8 F, *o*-F, [B(C<sub>6</sub>F<sub>5</sub>)<sub>4</sub>]<sup>-</sup>), -98.5 (s, 1 F, CF). **<sup>29</sup>Si{<sup>1</sup>H} NMR** (99.31 MHz, 305.0 K, CD<sub>2</sub>Cl<sub>2</sub>): δ = 25.5 (<sup>1</sup>J<sub>Si,Se</sub> = 33 Hz). **<sup>77</sup>Se{<sup>1</sup>H} NMR** (95.36 MHz, 305.0 K, CD<sub>2</sub>Cl<sub>2</sub>): δ = 279.3. **<sup>11</sup>B{<sup>1</sup>H} NMR** (160.38 MHz, 305.0 K, CD<sub>2</sub>Cl<sub>2</sub>): δ = -16.4.

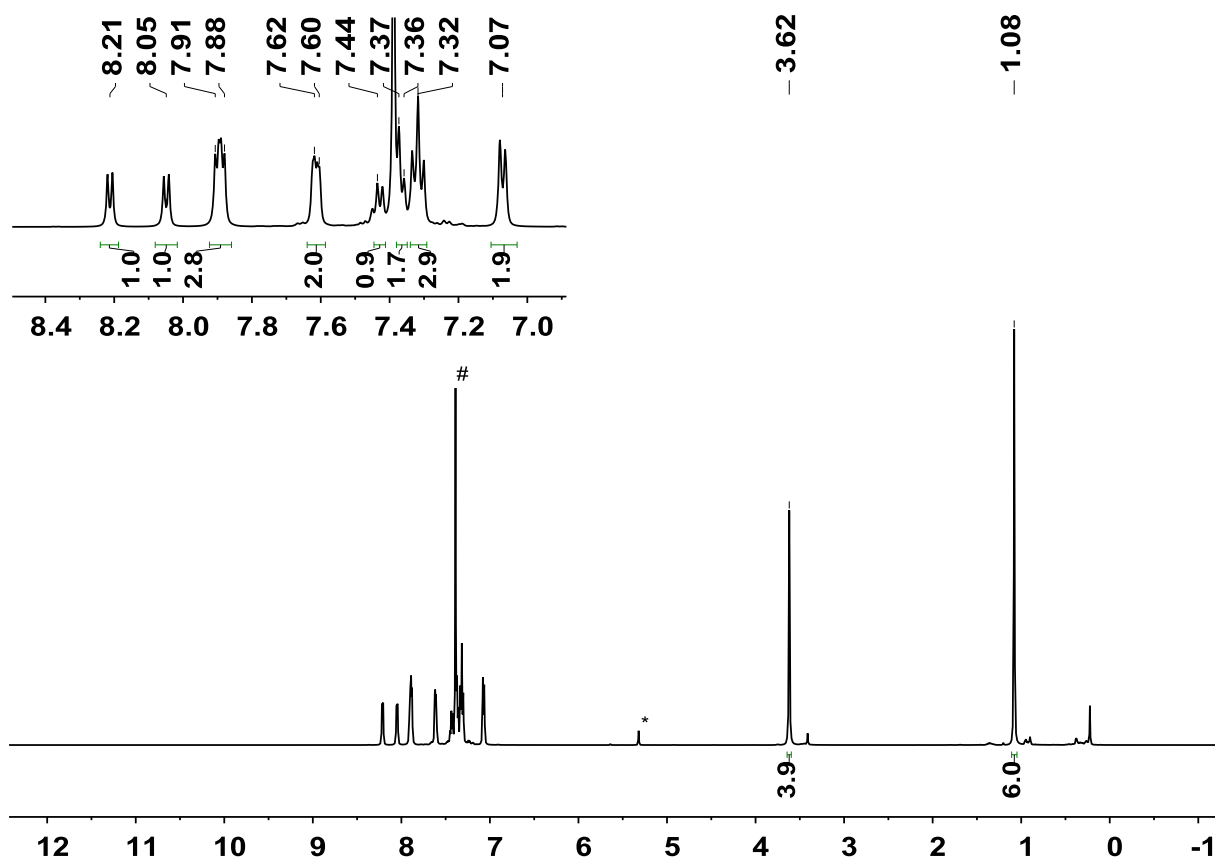

Figure S22 –  $^1\text{H}$  NMR spectrum (499.87 MHz, 305.1 K,  $\text{CD}_2\text{Cl}_2$ ,  $^*\text{CDHCl}_2$ ,  $\# \text{C}_6\text{H}_6$ ) of  $10\text{c}[\text{B}(\text{C}_6\text{F}_5)_4]$ .

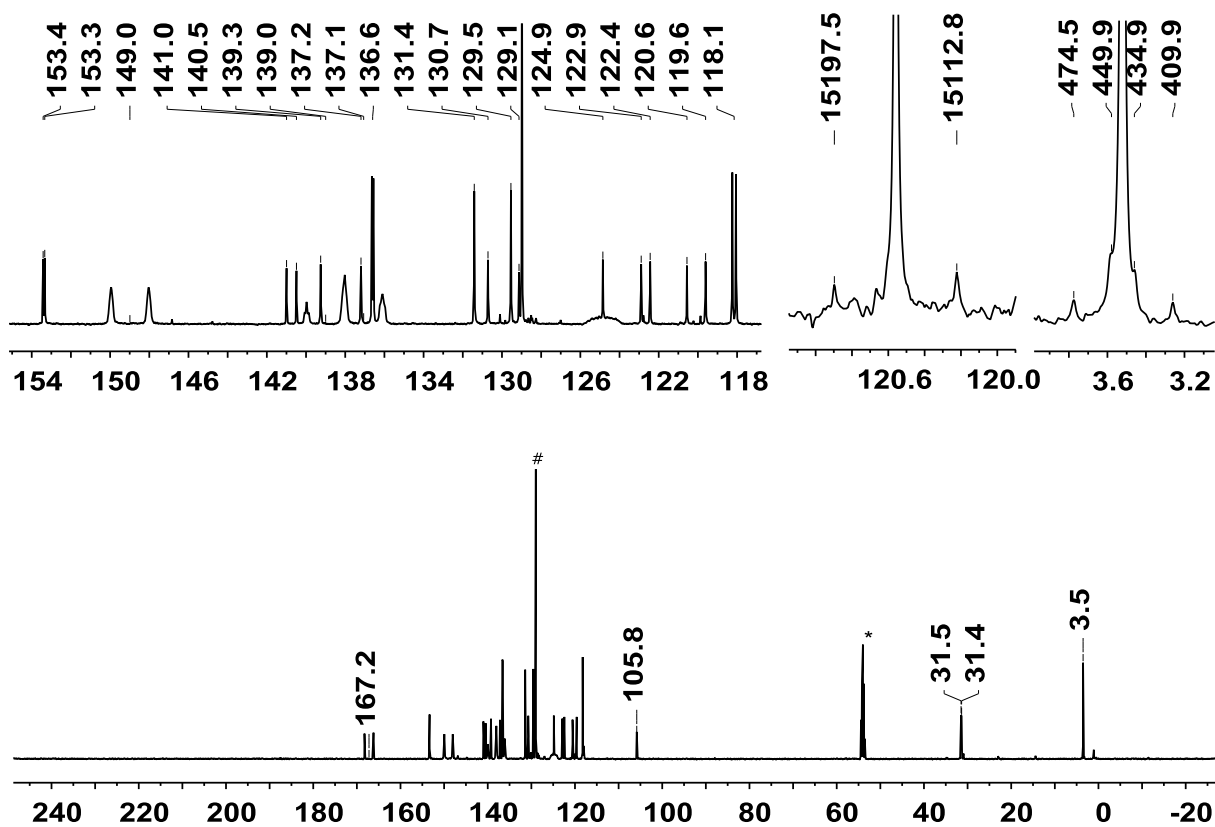

Figure S23 –  $^{13}\text{C}\{^1\text{H}\}$  NMR spectrum (125.71 MHz, 305.0 K,  $\text{CD}_2\text{Cl}_2$ ,  $\# \text{C}_6\text{H}_6$ ) of  $10\text{c}[\text{B}(\text{C}_6\text{F}_5)_4]$ .



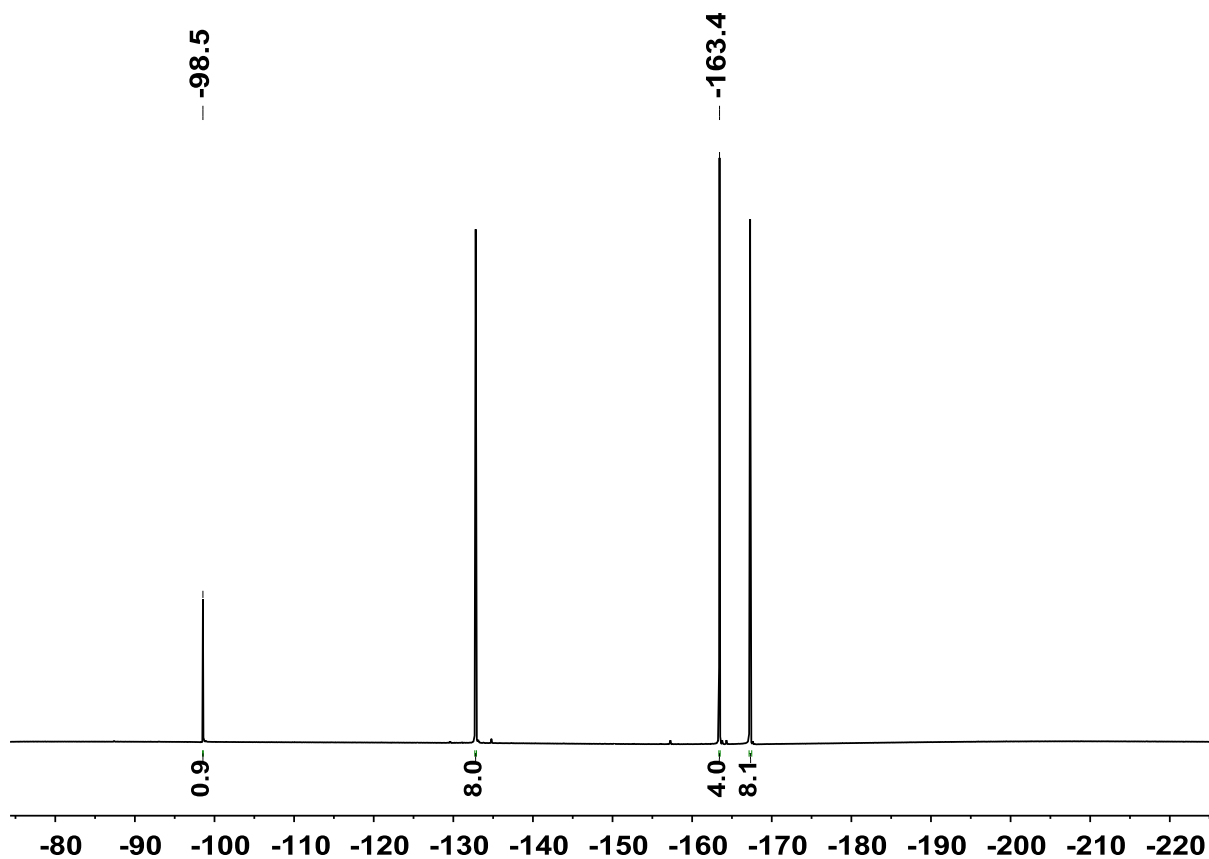

Figure S24 –  $^{19}\text{F}\{^1\text{H}\}$  NMR spectrum (470.28 MHz, 305.0 K,  $\text{CD}_2\text{Cl}_2$ ) of  $10\text{c}[\text{B}(\text{C}_6\text{F}_5)_4]$ .

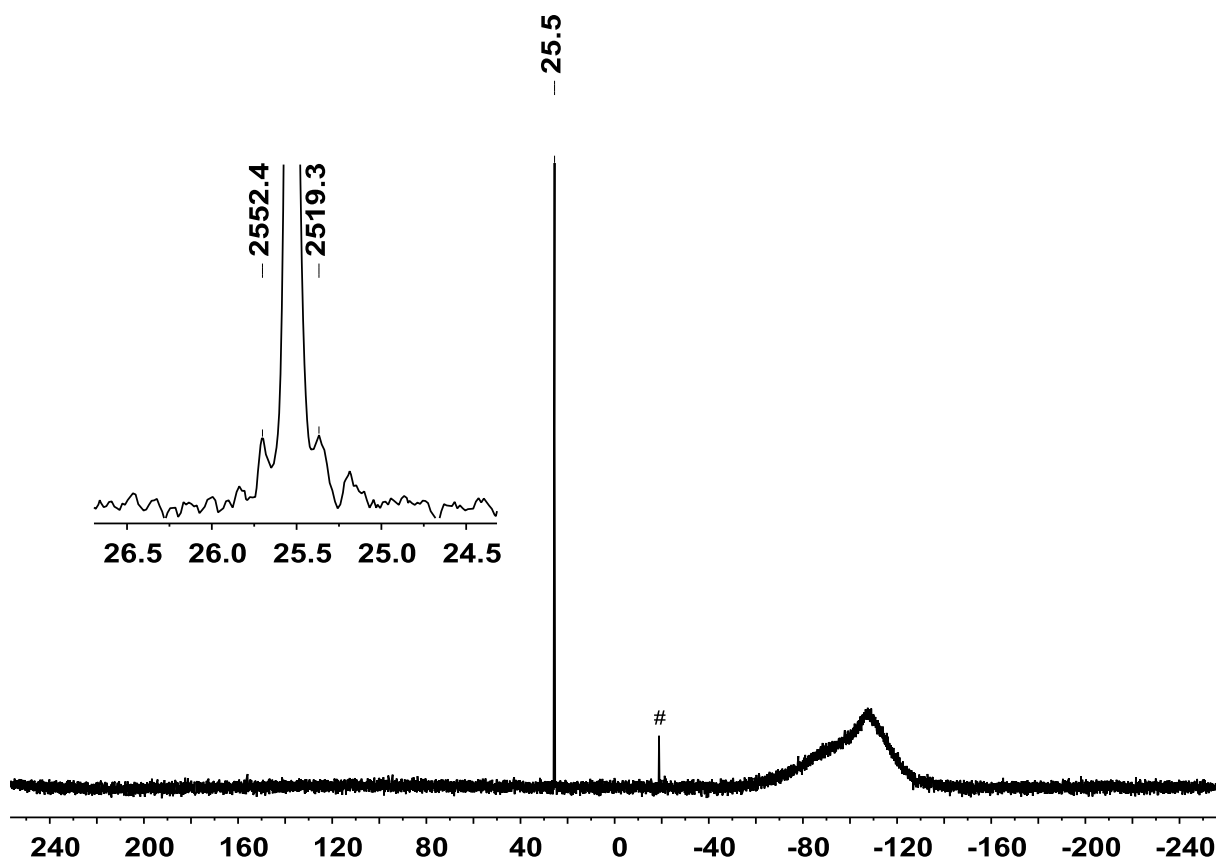

Figure S25 –  $^{29}\text{Si}\{^1\text{H}\}$  NMR spectrum (99.31 MHz, 305.0 K,  $\text{CD}_2\text{Cl}_2$ , #impurity) of  $10\text{c}[\text{B}(\text{C}_6\text{F}_5)_4]$ .

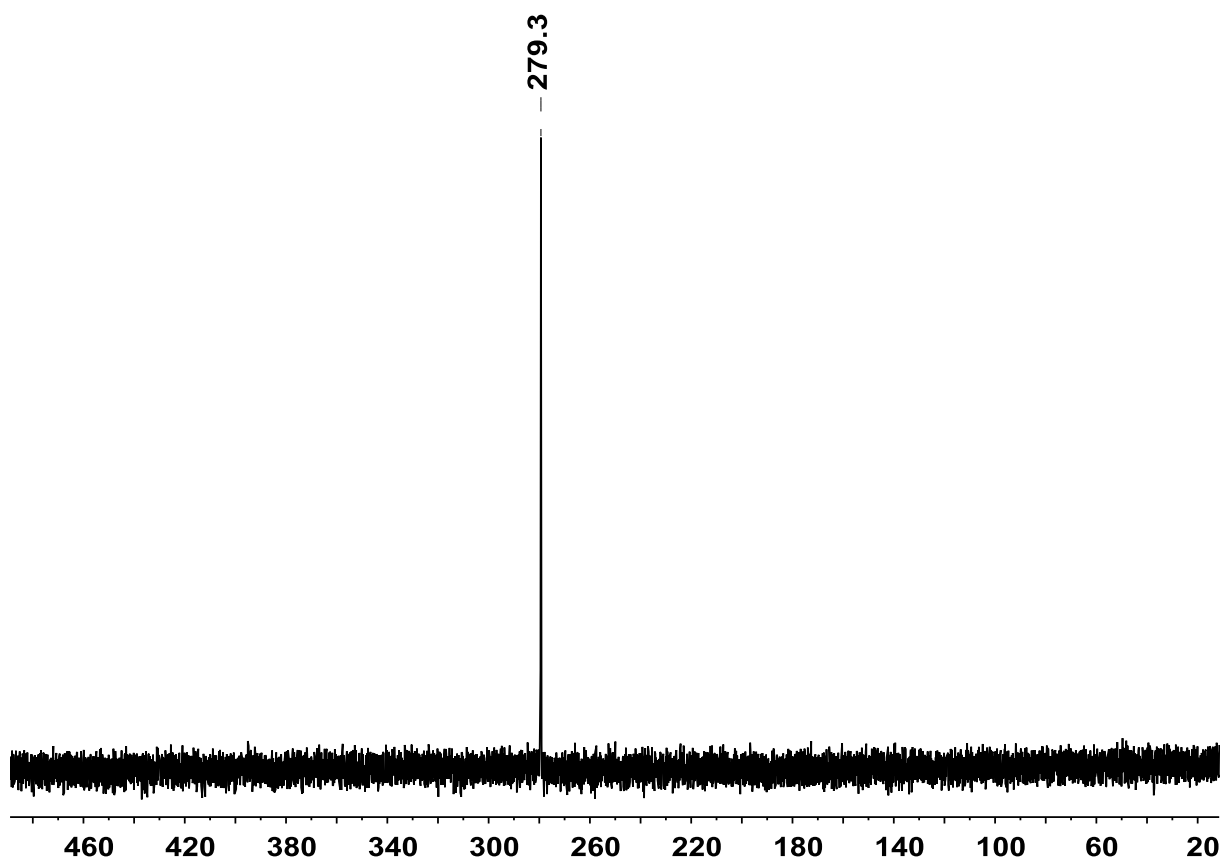

Figure S26 –  $^{77}\text{Se}\{^1\text{H}\}$  NMR spectrum (95.36 MHz, 305.0 K,  $\text{CD}_2\text{Cl}_2$ ) of  $10\text{c}[\text{B}(\text{C}_6\text{F}_5)_4]$ .

One Schlenk tube was charged with 1.0 equiv. 1-phenylselenenyl-8-dimethylsilylnaphthalene **8c** (120 mg, 351  $\mu\text{mol}$ ). In another Schlenk tube 1.0 equiv. trityl borate  $[\text{Ph}_3\text{C}][\text{B}(\text{C}_6\text{F}_5)_4]$  (324 mg, 351  $\mu\text{mol}$ ) was dissolved in benzene. This solution was added to silane **8c**. The resulting mixture was stirred for one hour. After that the nonpolar phase was removed. The polar phase was washed with a mixture of benzene and pentane and then with pentane. After removing the solvent under reduced pressure, the residue was dissolved in dichloromethane- $d_2$ . 0.9 equiv. 4-fluorobenzonitrile (38 mg, 316  $\mu\text{mol}$ ) were added. The reaction mixture was stirred for 15 min and after that analyzed by NMR spectroscopy.

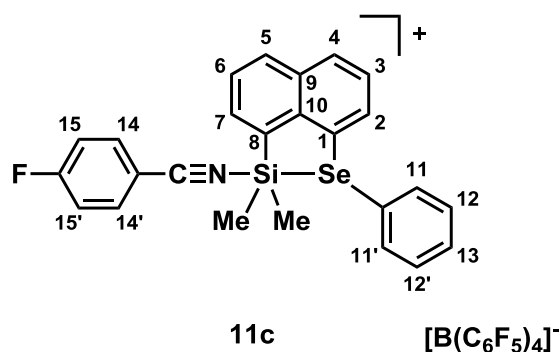

**$^1\text{H}$  NMR** (499.87 MHz, 305.0 K,  $\text{CD}_2\text{Cl}_2$ ):  $\delta$  = 0.98 (s, 6 H,  $\text{Si}(\text{CH}_3)_2$ ), 7.08-7.11 (m, 2 H, H-11, H-11'), 7.22-7.27 (m, 2 H, H-15, H-15'), 7.43-7.47 (m, 2 H, H-12, H-12'), 7.53-7.57 (m, H-13), 7.74-7.78 (m, 2 H, H-14, H-14'), 7.82-7.89 (m, 2 H, H-3, H-6), 8.14 (dd,  $^3J_{\text{H,H}} = 7.4$  Hz,  $^4J_{\text{H,H}} = 0.8$  Hz, 1 H, H-7), 8.17 (dd,  $^3J_{\text{H,H}} = 6.9$  Hz,  $^4J_{\text{H,H}} = 0.8$  Hz, 1 H, H-2), 8.29 (d,  $^3J_{\text{H,H}} = 7.8$  Hz, 1 H, H-5), 8.37 (d,  $^3J_{\text{H,H}} = 7.8$  Hz, 1 H, H-4).  **$^{13}\text{C}\{^1\text{H}\}$  NMR** (125.71 MHz, 305.0 K,  $\text{CD}_2\text{Cl}_2$ ):  $\delta$  = 0.3 ( $\text{Si}(\text{CH}_3)_2$ ), 108.1 (d,  $^4J_{\text{C,F}} = 2.1$  Hz,  $\underline{\text{C}}\text{-CN}$ ), 117.6 (d,  $^2J_{\text{C,F}} = 23.0$  Hz, C-15, C-15'), 119.0 (CN), 124.0-125.5 (brs, C,  $[\text{B}(\text{C}_6\text{F}_5)_4]^-$ ), 125.4 (C, C-Ph), 126.9 (C-9), 129.3 (C-3, C-6), 129.9 (C-11, C-11'), 131.8 (C-1/C-8), 132.2 (C-12, C-12'), 132.5 (C-13), 133.2 (C-5), 134.4 (C-4), 134.7 (C-2), 135.5 (C-1/C-8), 135.7 (d,  $^3J_{\text{C,F}} = 9.5$  Hz, C-14, C-14'), 136.9 (C-7), 137.1 (dm,  $^1J_{\text{C,F}} = 242.1$  Hz, CF,  $[\text{B}(\text{C}_6\text{F}_5)_4]^-$ ), 139.0 (dm,  $^1J_{\text{C,F}} = 243.9$  Hz, CF,  $[\text{B}(\text{C}_6\text{F}_5)_4]^-$ ), 140.2 (C-10), 166.3 (d,  $^1J_{\text{C,F}} = 257.2$  Hz, CF).  **$^{19}\text{F}\{^1\text{H}\}$  NMR** (470.29 MHz, 305.1 K,  $\text{CD}_2\text{Cl}_2$ ):  $\delta$  = -167.4 (-167.2) (m, 8 F, *m*-F,  $[\text{B}(\text{C}_6\text{F}_5)_4]^-$ ), -163.44 (t,  $^3J_{\text{F,F}} = 20.3$  Hz, 4 F, *p*-F,  $[\text{B}(\text{C}_6\text{F}_5)_4]^-$ ), -132.9 (-132.7) (m, 8 F, *o*-F,  $[\text{B}(\text{C}_6\text{F}_5)_4]^-$ ), -101.9 (s, 1 F, CF).  **$^{29}\text{Si}\{^1\text{H}\}$  NMR** (99.31 MHz, 305.0 K,  $\text{CD}_2\text{Cl}_2$ ):  $\delta$  = 49.2 ( $^1J_{\text{Si,Se}} = 56$  Hz).  **$^{77}\text{Se}\{^1\text{H}\}$  NMR** (95.36 MHz, 305.0 K,  $\text{CD}_2\text{Cl}_2$ ):  $\delta$  = 254.8 ( $^1J_{\text{Se,Si}} = 56$  Hz).  **$^{11}\text{B}\{^1\text{H}\}$  NMR** (160.38 MHz, 305.1 K,  $\text{CD}_2\text{Cl}_2$ ):  $\delta$  = -16.5.

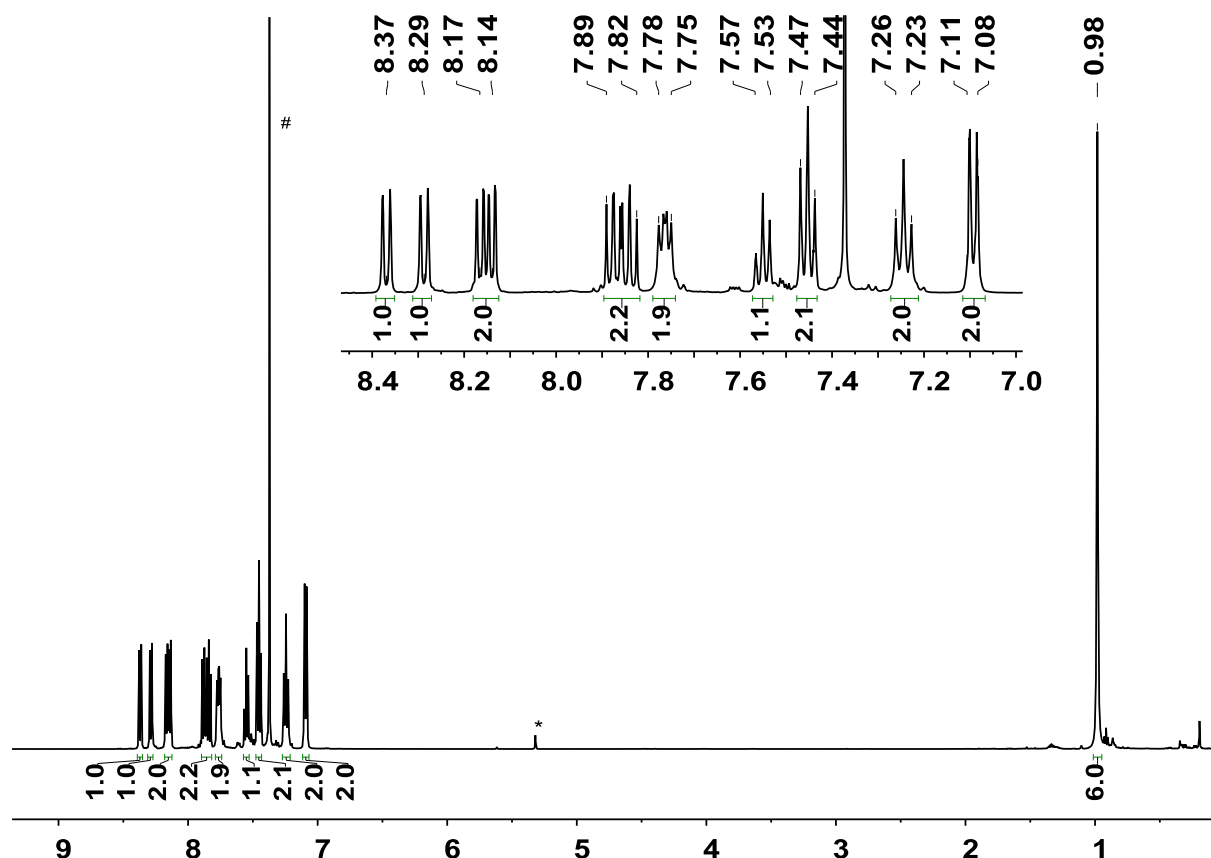

Figure S27 –  $^1\text{H}$  NMR spectrum (499.87 MHz, 305.0 K,  $\text{CD}_2\text{Cl}_2$ ,  $^*\text{CDHCl}_2$ ,  $\#\text{C}_6\text{H}_6$ ) of  $11\text{c}[\text{B}(\text{C}_6\text{F}_5)_4]$ .

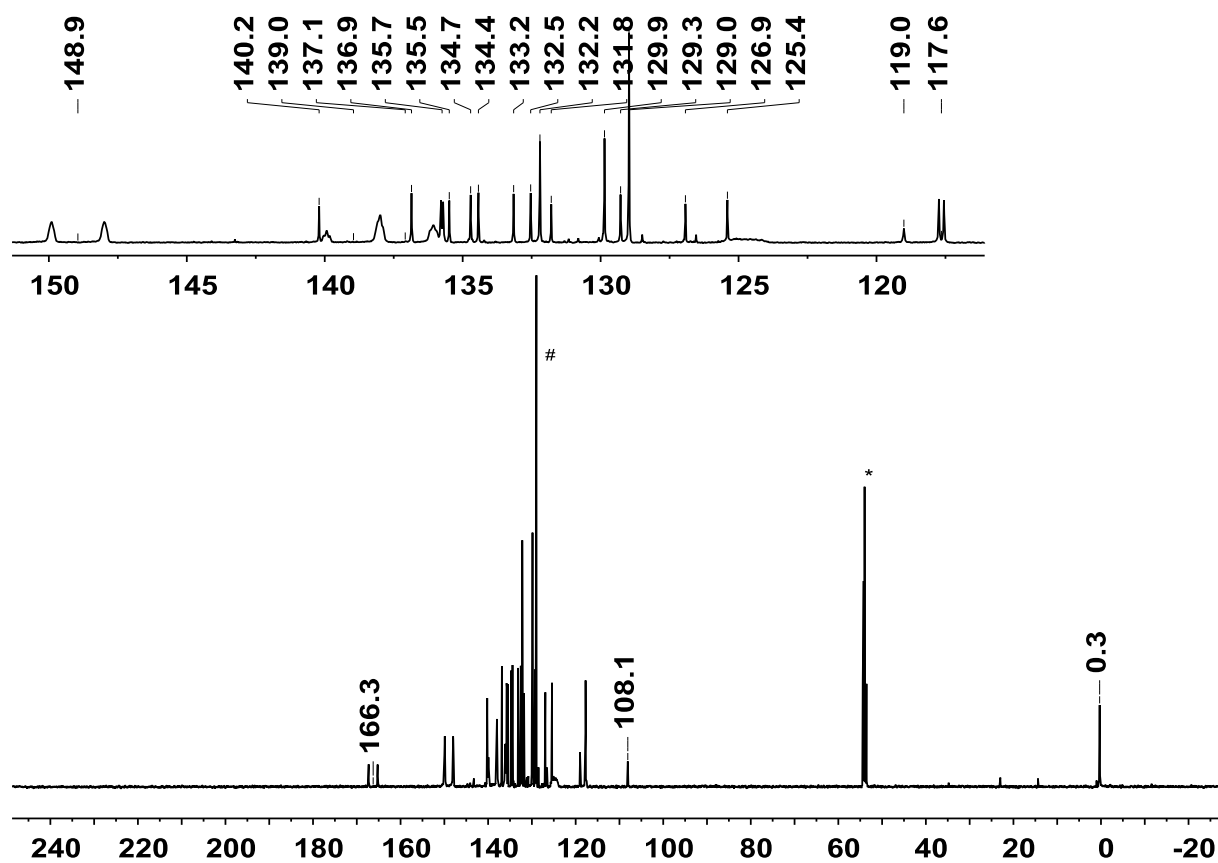

Figure S28 –  $^{13}\text{C}\{^1\text{H}\}$  NMR spectrum (125.71 MHz, 305.0 K,  $^*\text{CD}_2\text{Cl}_2$ ,  $^#\text{C}_6\text{H}_6$ ) of  $11\text{c}[\text{B}(\text{C}_6\text{F}_5)_4]$ .

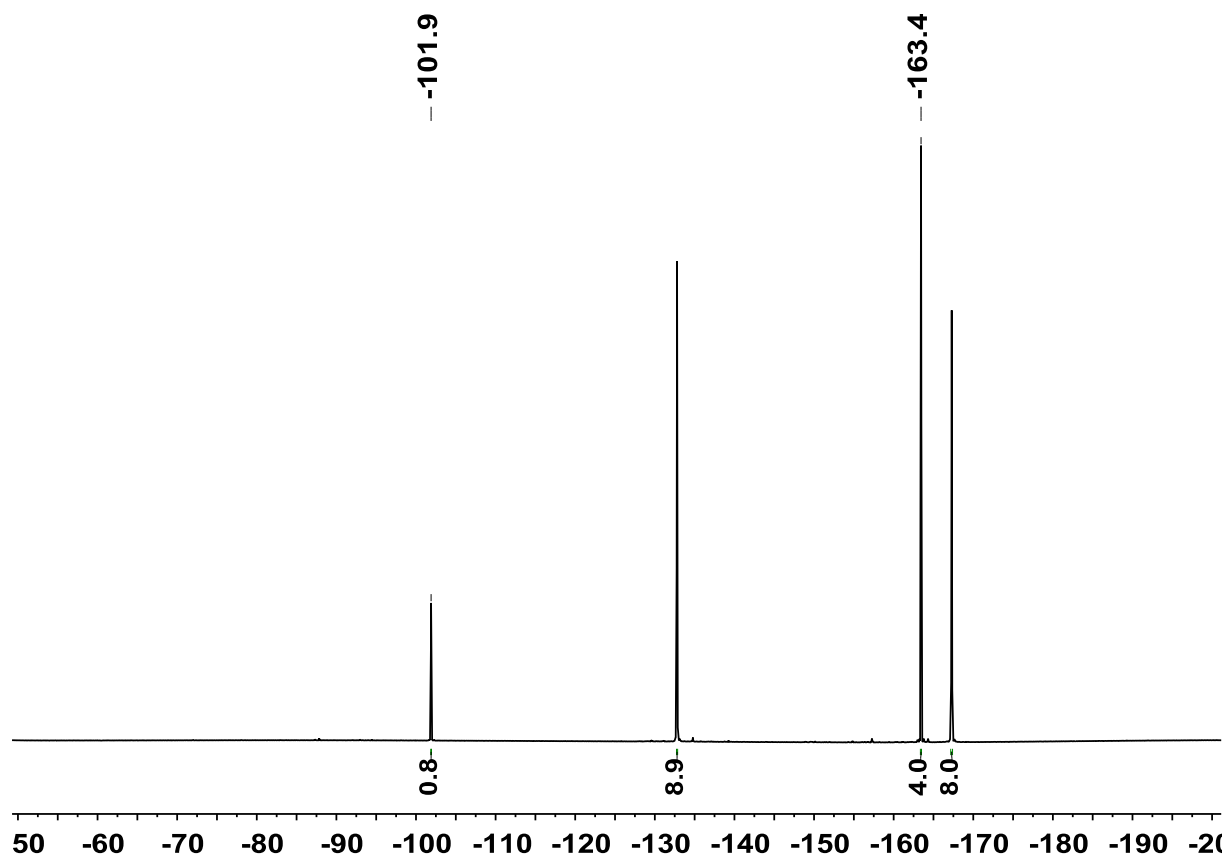

Figure S29 –  $^{19}\text{F}\{^1\text{H}\}$  NMR spectrum (470.29 MHz, 305.1 K,  $\text{CD}_2\text{Cl}_2$ ) of  $11\text{c}[\text{B}(\text{C}_6\text{F}_5)_4]$ .

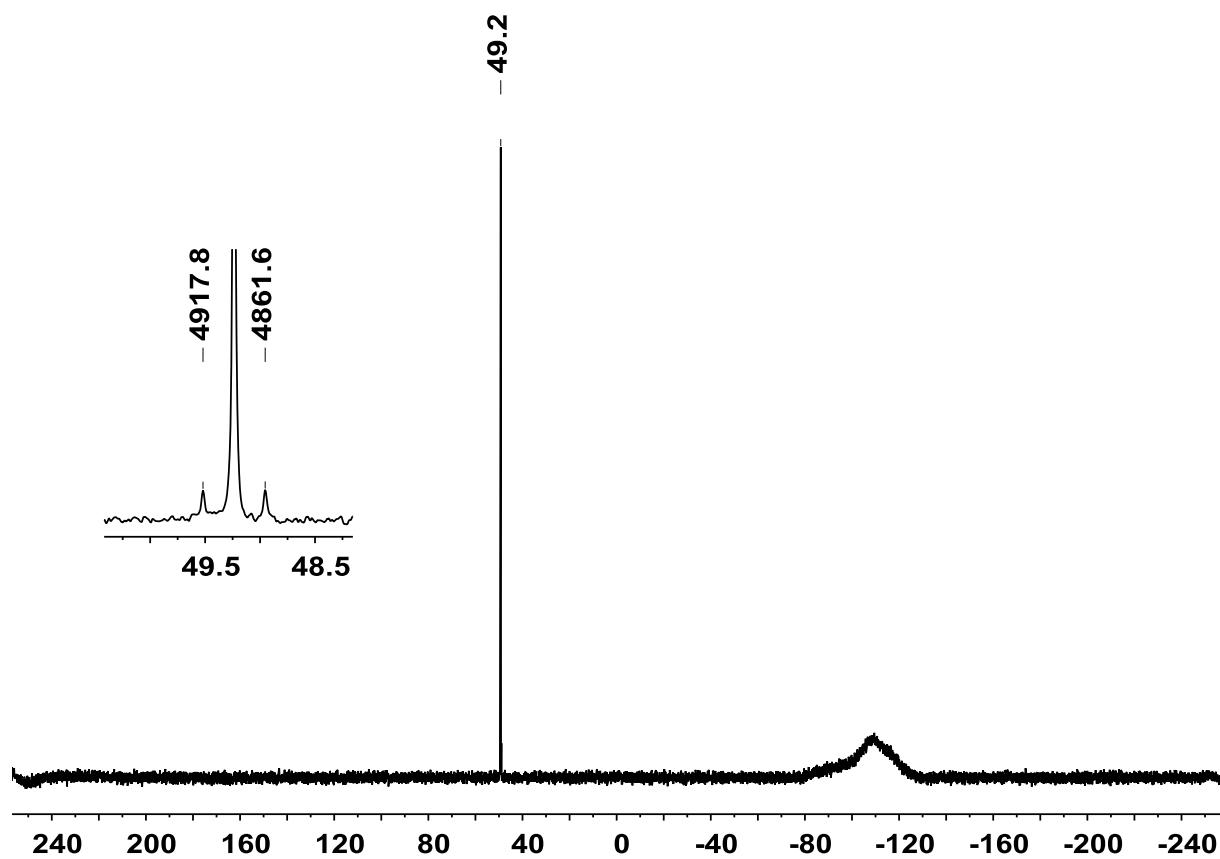

Figure S30 –  $^{29}\text{Si}\{^1\text{H}\}$  NMR spectrum (99.31 MHz, 305.0 K,  $\text{CD}_2\text{Cl}_2$ ) of  $11\text{c}[\text{B}(\text{C}_6\text{F}_5)_4]$ .

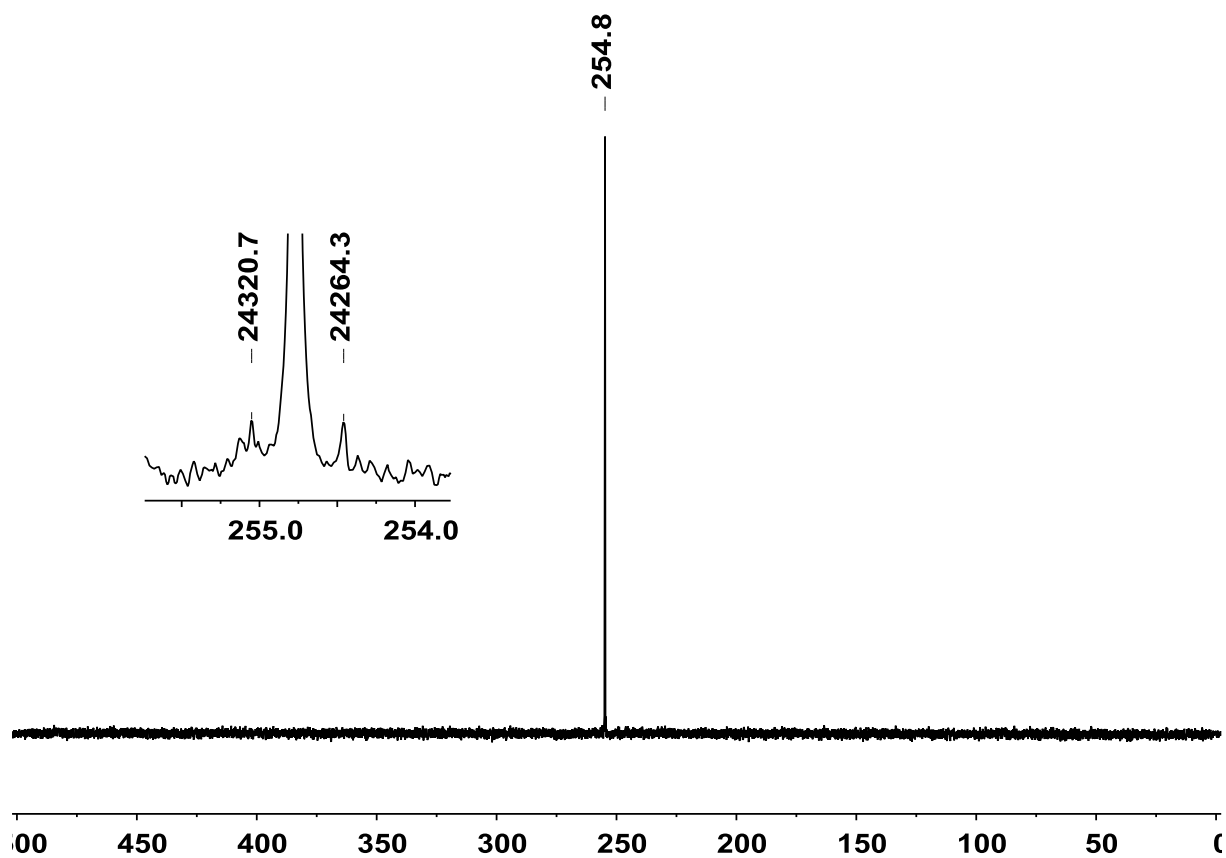

Figure S31 –  $^{77}\text{Se}\{^1\text{H}\}$  NMR spectrum (95.36 MHz, 305.0 K,  $\text{CD}_2\text{Cl}_2$ ) of  $10\text{c}[\text{B}(\text{C}_6\text{F}_5)_4]$ .

### Tellurylmesityl substituted derivative

The nitrilium ion **10d**[B(C<sub>6</sub>F<sub>5</sub>)<sub>4</sub>] was synthesized according to general procedure **C** using 1.0 equiv. 6-dimethylsilyl-5-mesityltellurylacenaphthene **7d** (147 mg, 400 μmol), 1.0 equiv. trityl borate (369 mg, 400 μmol) and 1.0 equiv. 4-fluorobenzonitrile (49 mg, 400 μmol).

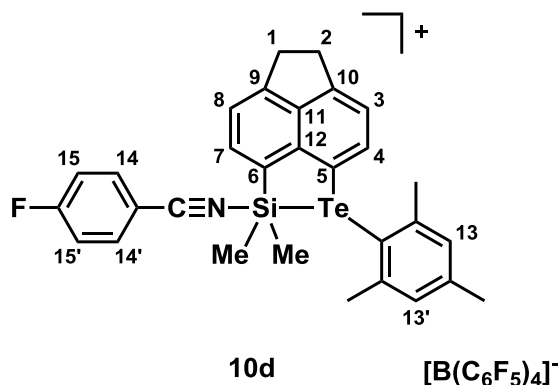

**<sup>1</sup>H NMR** (499.87 MHz, 305.1 K, CD<sub>2</sub>Cl<sub>2</sub>): δ = 1.11 (s, 6 H, Si(CH<sub>3</sub>)<sub>2</sub>), 2.19 (s, 6 H, *o*-CH<sub>3</sub>-Mes), 2.33 (s, 3 H, *p*-CH<sub>3</sub>-Mes), 3.59-3.63 (m, 4 H, 2 × CH<sub>2</sub>), 7.04 (s, 2 H, H-13, H-13'), 7.20-7.25 (m, 3 H, H-15, H-15'), 7.58 (d, <sup>3</sup>J<sub>H,H</sub> = 7.2 Hz, 1 H, H-3), 7.63 (d, <sup>3</sup>J<sub>H,H</sub> = 6.9 Hz, 1 H, H-8), 7.70-7.73 (m, 3 H, H-14, H-14'), 8.05 (d, <sup>3</sup>J<sub>H,H</sub> = 6.9 Hz, 1 H, H-7), 8.12 (d, <sup>3</sup>J<sub>H,H</sub> = 7.2 Hz, 1 H, H-4). **<sup>13</sup>C{<sup>1</sup>H} NMR** (125.71 MHz, 305.0 K, CD<sub>2</sub>Cl<sub>2</sub>): δ = 1.8 (<sup>1</sup>J<sub>C,Si</sub> = 53.7 Hz, <sup>2</sup>J<sub>C,Te</sub> = 24.2 Hz, Si(CH<sub>3</sub>)<sub>2</sub>), 20.9 (CH<sub>3</sub>, *p*-Mes), 25.5 (CH<sub>3</sub>, *o*-Mes), 31.3 (CH<sub>2</sub>-2), 31.4 (CH<sub>2</sub>-1), 108.3 (d, <sup>4</sup>J<sub>C,F</sub> = 2.9 Hz, C-CN), 114.0 (C-5), 115.0 (C, *ipso*-Mes), 117.6 (d, <sup>2</sup>J<sub>C,F</sub> = 22.9 Hz, C-15, C-15'), 119.1 (CN), 122.6 (C-8), 123.0 (C-3), 124.0-125.6 (brs, C, [B(C<sub>6</sub>F<sub>5</sub>)<sub>4</sub>]<sup>+</sup>), 132.2 (C-13, C-13'), 132.2 (C-6), 135.7 (d, <sup>3</sup>J<sub>C,F</sub> = 9.6 Hz, C-14, C-14'), 137.0 (dm, <sup>1</sup>J<sub>C,F</sub> = 242.0 Hz, CF, [B(C<sub>6</sub>F<sub>5</sub>)<sub>4</sub>]<sup>+</sup>), 137.8 (C-7), 139.0 (dm, <sup>1</sup>J<sub>C,F</sub> = 244.2 Hz, CF, [B(C<sub>6</sub>F<sub>5</sub>)<sub>4</sub>]<sup>+</sup>), 139.4 (C-4), 141.3 (C-11), 142.9 (C-12), 143.8 (C, *p*-Mes), 144.2 (C, *o*-Mes), 149.0 (d, <sup>1</sup>J<sub>C,F</sub> = 240.7 Hz, CF, [B(C<sub>6</sub>F<sub>5</sub>)<sub>4</sub>]<sup>+</sup>), 153.2 (C-9), 154.2 (C-10), 166.2 (d, <sup>1</sup>J<sub>C,F</sub> = 257.1 Hz, CF). **<sup>19</sup>F{<sup>1</sup>H} NMR** (470.28 MHz, 305.0 K, CD<sub>2</sub>Cl<sub>2</sub>): δ = -167.4-(-167.2) (m, 8 F, *m*-F, [B(C<sub>6</sub>F<sub>5</sub>)<sub>4</sub>]<sup>+</sup>), -163.44 (t, <sup>3</sup>J<sub>F,F</sub> = 20.4 Hz, 4 F, *o*-F, [B(C<sub>6</sub>F<sub>5</sub>)<sub>4</sub>]<sup>+</sup>), -132.8-(-132.6) (m, 8 F, *o*-F, [B(C<sub>6</sub>F<sub>5</sub>)<sub>4</sub>]<sup>+</sup>), -102.1 (s, 1 F, CF). **<sup>29</sup>Si{<sup>1</sup>H} NMR** (99.31 MHz, 305.0 K, CD<sub>2</sub>Cl<sub>2</sub>): δ = 48.6 (<sup>1</sup>J<sub>Si,Te</sub> = 171 Hz). **<sup>29</sup>Si{<sup>1</sup>H} INEPT NMR** (99.31 MHz, 305.0 K, d<sub>3</sub> = 0.0084, d<sub>4</sub> = 0.0313, CD<sub>2</sub>Cl<sub>2</sub>): δ = 48.6 (<sup>1</sup>J<sub>Si,C</sub> = 68.2 Hz, <sup>1</sup>J<sub>Si,C</sub> = 53.3 Hz, <sup>1</sup>J<sub>Si,Te</sub> = 171 Hz). **<sup>125</sup>Te{<sup>1</sup>H} NMR** (157.75 MHz, 305.0 K, CD<sub>2</sub>Cl<sub>2</sub>): δ = 219.7 (<sup>1</sup>J<sub>Te,Si</sub> = 171 Hz). **<sup>11</sup>B{<sup>1</sup>H} NMR** (160.38 MHz, 305.1 K, CD<sub>2</sub>Cl<sub>2</sub>): δ = -16.4.

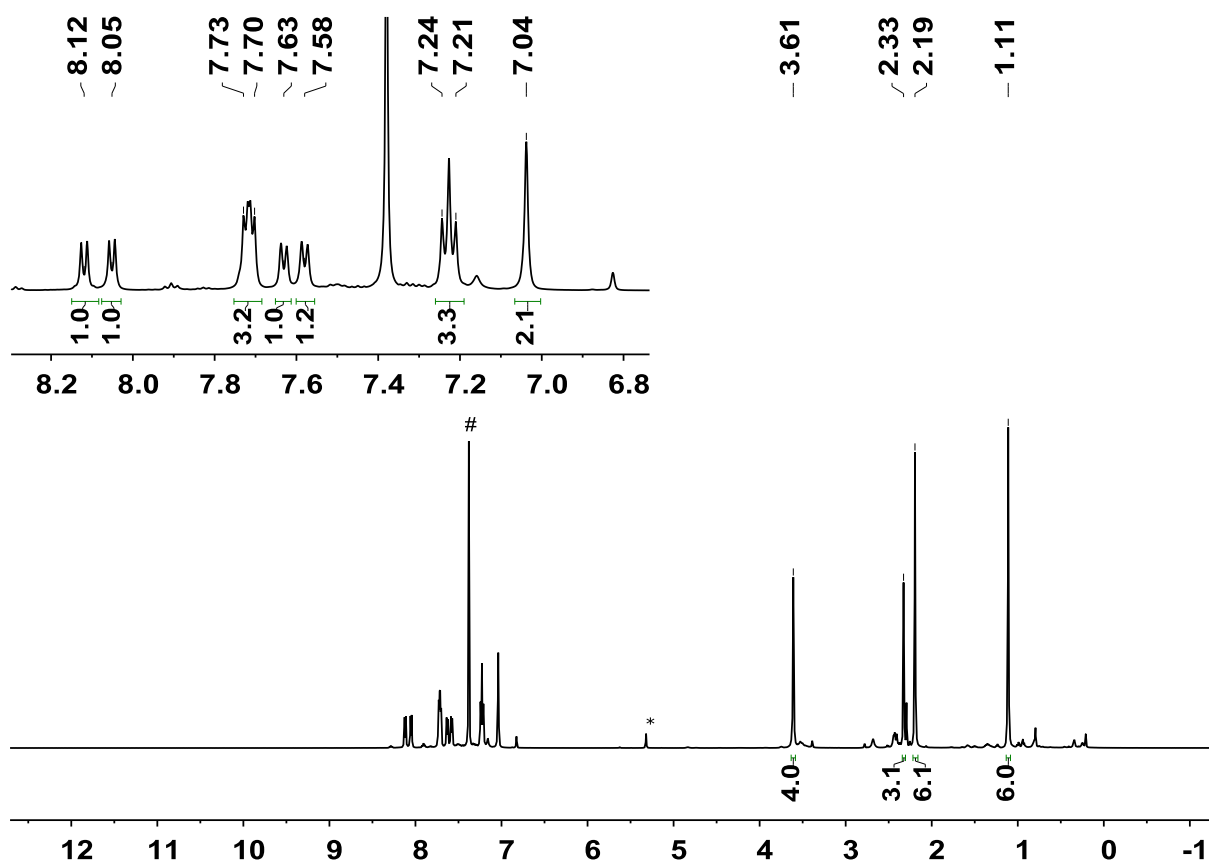

Figure S32 –  $^1\text{H}$  NMR spectrum (499.87 MHz, 305.1 K,  $\text{CD}_2\text{Cl}_2$ ,  $^*\text{CDHCl}_2$ ,  $\# \text{C}_6\text{H}_6$ ) of  $10\text{d}[\text{B}(\text{C}_6\text{F}_5)_4]$ .

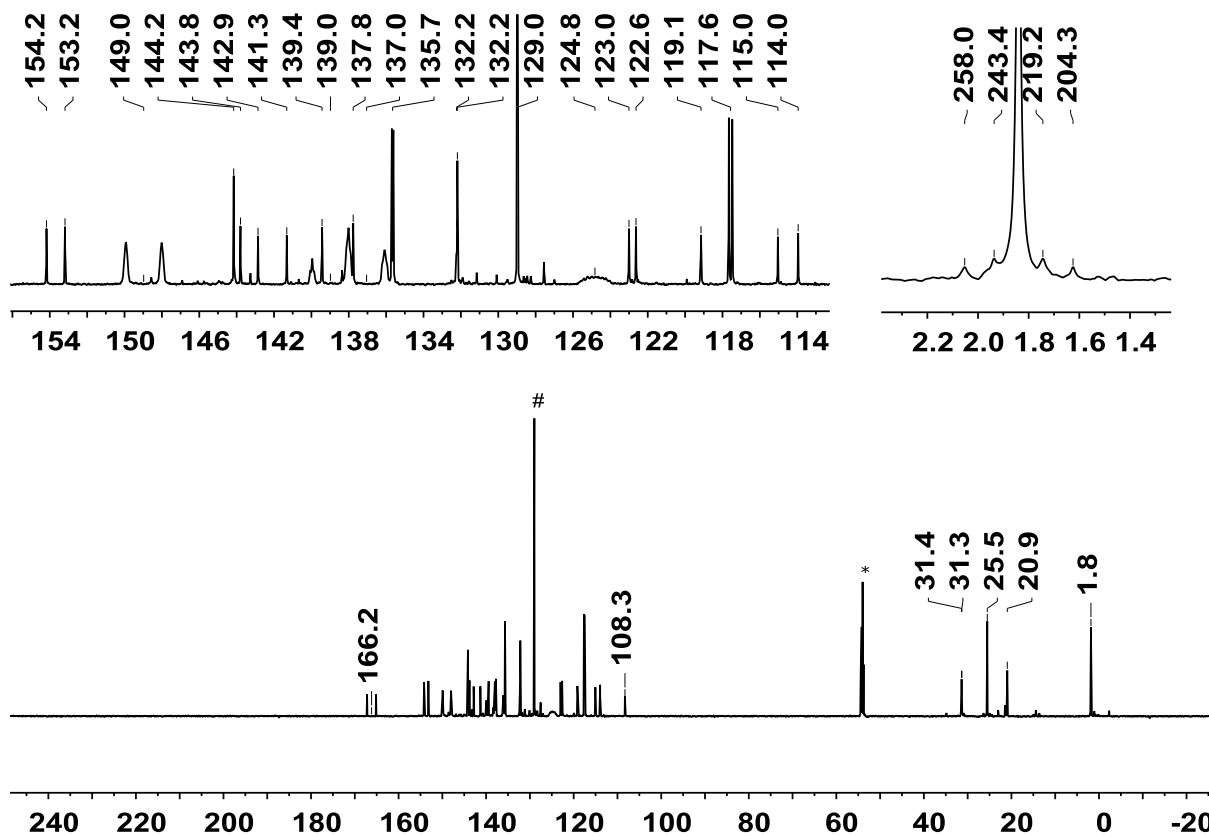

Figure S33 –  $^{13}\text{C}\{^1\text{H}\}$  NMR spectrum (125.71 MHz, 305.0 K,  $\text{CD}_2\text{Cl}_2$ ,  $\# \text{C}_6\text{H}_6$ ) of  $10\text{d}[\text{B}(\text{C}_6\text{F}_5)_4]$ .

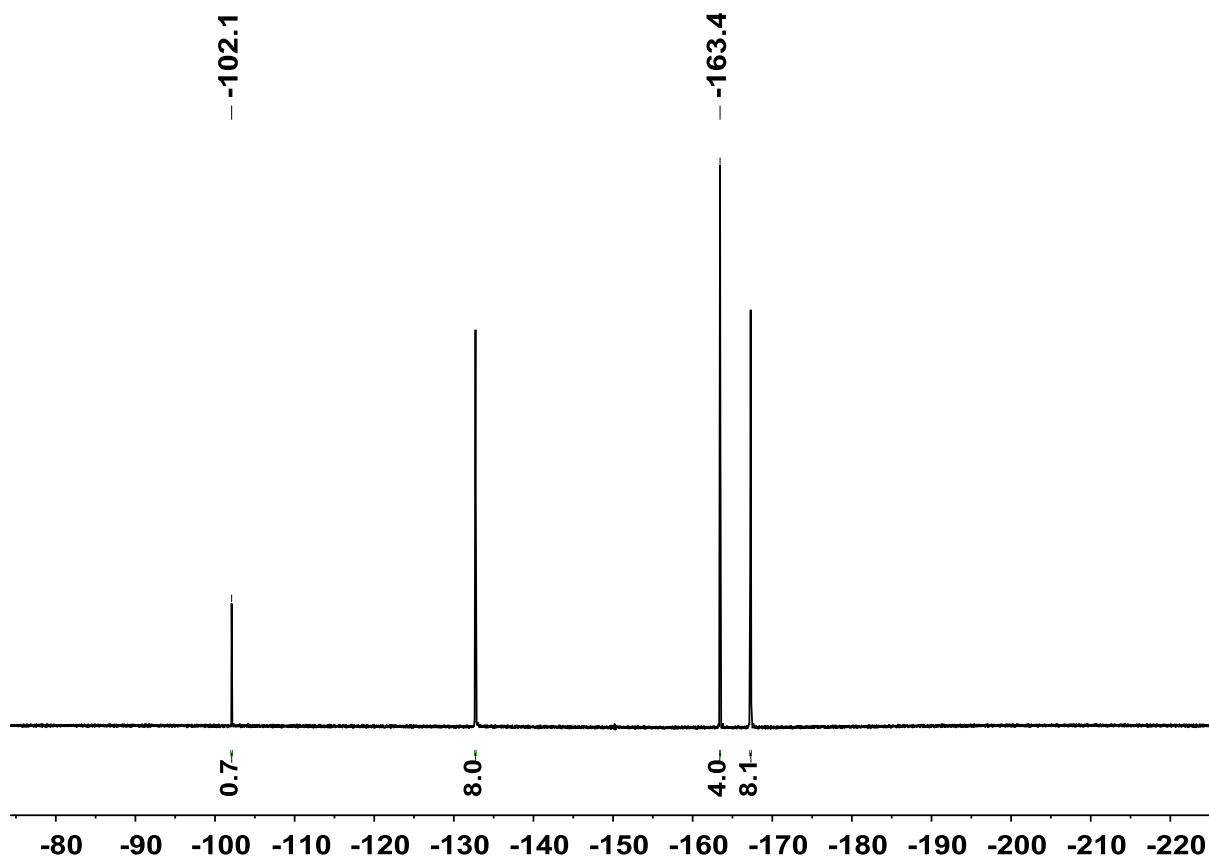

Figure S34 –  $^{19}\text{F}\{^1\text{H}\}$  NMR spectrum (470.28 MHz, 305.0 K,  $\text{CD}_2\text{Cl}_2$ ) of  $10\text{d}[\text{B}(\text{C}_6\text{F}_5)_4]$ .

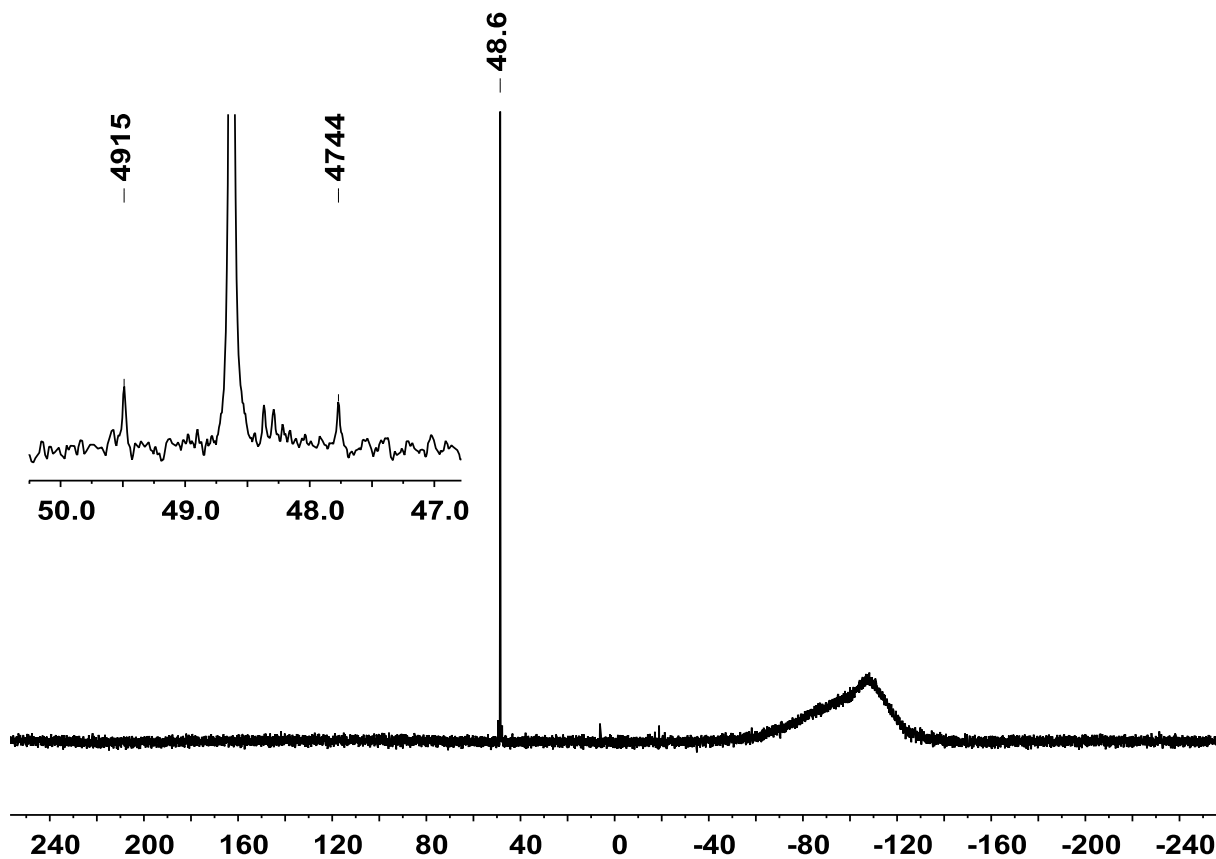

Figure S35 –  $^{29}\text{Si}\{^1\text{H}\}$  NMR spectrum (99.31 MHz, 305.0 K,  $\text{CD}_2\text{Cl}_2$ ) of  $10\text{d}[\text{B}(\text{C}_6\text{F}_5)_4]$ .



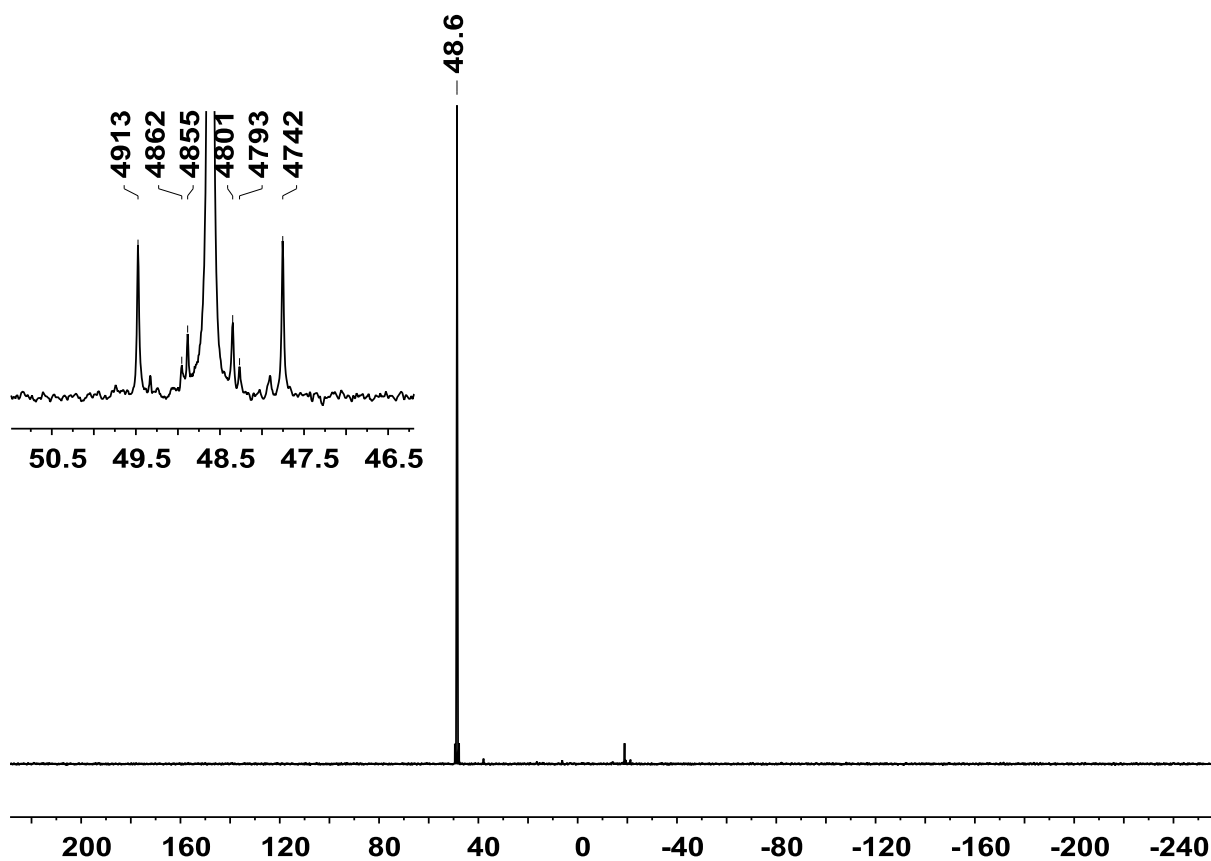

Figure S36 –  $^{29}\text{Si}\{^1\text{H}\}$  INEPT NMR spectrum (99.31 MHz, 305.0 K,  $d_3 = 0.0084$ ,  $d_4 = 0.0313$ ,  $\text{CD}_2\text{Cl}_2$ ) of  $10\text{d}[\text{B}(\text{C}_6\text{F}_5)_4]$ .

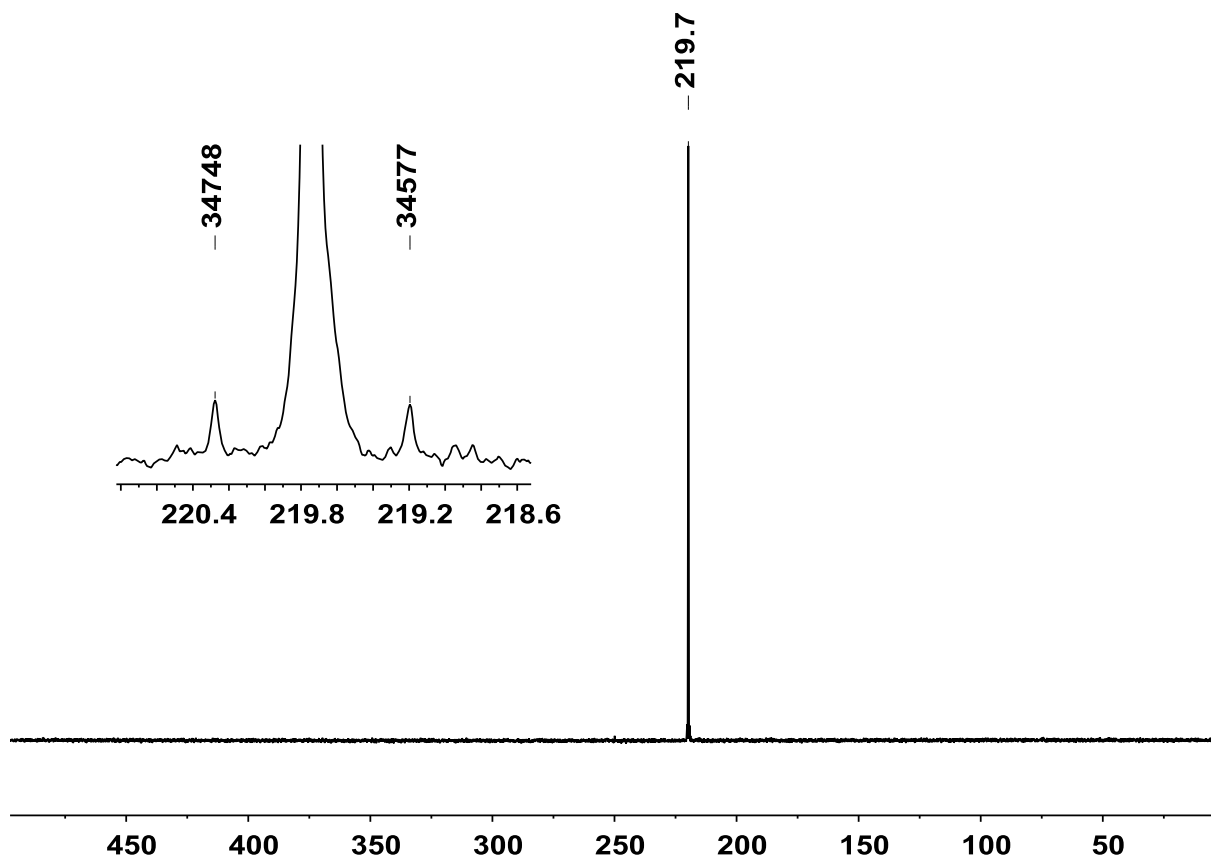

Figure S37 –  $^{125}\text{Te}\{^1\text{H}\}$  NMR spectrum (157.75 MHz, 305.0 K,  $\text{CD}_2\text{Cl}_2$ ) of  $10\text{d}[\text{B}(\text{C}_6\text{F}_5)_4]$ .

## Halogene substituted derivatives

### Bromine

**In toluene-d<sub>8</sub>:** A solution of trityl borate (1.0 equiv., 434  $\mu$ mol, 400 mg) in toluene-d<sub>8</sub> was added to a solution of 5-bromo-6-dimethylsilylacenaphthene (1.1 equiv., 477  $\mu$ mol, 138 mg) in toluene-d<sub>8</sub> at -10 °C and stirred for 30 min at the same temperature. Then, the biphasic reaction mixture was allowed to warm to room temperature and the upper, nonpolar phase was removed. The polar phase was washed with 0.3 mL toluene-d<sub>8</sub>. After the polar phase was analyzed by NMR spectroscopy 4-fluorobenzonitrile (1.0 equiv., 434  $\mu$ mol, 53 mg) was added. Afterwards, the reaction mixture was stirred for further 10 min and nitrilium borate **10e**[B(C<sub>6</sub>F<sub>5</sub>)<sub>4</sub>] was subsequently analyzed by NMR spectroscopy.

### In dichloromethane-d<sub>2</sub>:

A solution of trityl borate (1.0 equiv., 200 mg, 217  $\mu$ mol) in toluene was added to a solution of 5-bromo-6-dimethylsilylacenaphthene **7e** (1.1 equiv., 70 mg, 239  $\mu$ mol) in toluene at -10 °C and stirred for 30 min at the same temperature. The reaction mixture was allowed to warm to r.t. and the upper, nonpolar phase was removed. Then 4-fluorobenzonitrile (1.0 equiv., 27 mg, 217  $\mu$ mol) was added to the reaction mixture and stirred for 10 min. The polar phase was washed with benzene first and then up to two times with *n*-pentane. After removing the solvent under reduced pressure, the residue was dissolved in dichloromethane-d<sub>2</sub> and analyzed by NMR spectroscopy.

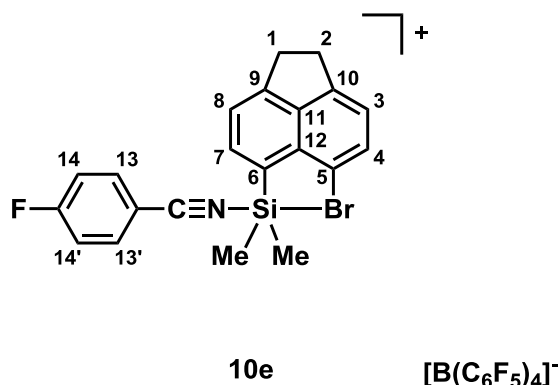

**<sup>1</sup>H NMR** (500.13 MHz, 301.0 K, C<sub>7</sub>D<sub>8</sub>):  $\delta$  = 0.95 (s, 6H, Si(CH<sub>3</sub>)<sub>2</sub>), 2.89-2.92 (m, 2H, CH<sub>2</sub>), 3.02-3.04 (m, 2H, CH<sub>2</sub>), 6.63-6.66 (m, 3H, H-14, H-14'), 6.86 (d, 1H, <sup>3</sup>J<sub>H,H</sub> = 7.6 Hz, H-3), 7.14 (d, 1H, <sup>3</sup>J<sub>H,H</sub> = 7.2 Hz, H-8), 7.17-7.20 (m, 3H, H-13, H-13'), 7.47 (d, 1H, <sup>3</sup>J<sub>H,H</sub> = 7.4 Hz, H-4), 7.80 (d, 1H, <sup>3</sup>J<sub>H,H</sub> = 7.2 Hz, H-7). **<sup>1</sup>H NMR** (499.87 MHz, 305.0 K,

$\text{CD}_2\text{Cl}_2$ ):  $\delta = 1.30$  (s, 6H,  $\text{Si}(\text{CH}_3)_2$ ), 3.41-3.52 (m, 4H, 2x  $\text{CH}_2$ ), 7.36-7.39 (m, 1H, H-3, overlapping with  $\text{C}_6\text{H}_6$ ), 7.42 (d, 1H,  $^3J_{\text{H,H}} = 7.2$  Hz, H-8), 7.47 (t, 3H,  $^3J_{\text{H,H}} = 8.3$  Hz, H-14, H-14'), 7.87 (d, 1H,  $^3J_{\text{H,H}} = 7.5$  Hz, H-4), 8.07 (d, 1H,  $^3J_{\text{H,H}} = 7.3$  Hz, H-7), 8.10-8.20 (m, 3H, H-13, H-13').  **$^{13}\text{C}\{^1\text{H}\}$  NMR** (125.77 MHz, 300.8 K,  $\text{C}_7\text{D}_8$ ):  $\delta = 4.5$  ( $\text{Si}(\text{CH}_3)_2$ ), 29.8 ( $\text{CH}_2$ ), 30.7 ( $\text{CH}_2$ ), 100.5 (s,  $\underline{\text{C}}\text{-CN}$ ), 115.6 (C, C-5), 118.2 (d,  $^2J_{\text{C,F}} = 23.6$  Hz, CH, C-14, C-14'), 119.8 (C, C-6), 120.3 (CH, C-8), 122.4 (CH, C-3, overlapping with  $\underline{\text{C}}\text{N}$ ), 124.1-125.8 (brs, C,  $[\text{B}(\text{C}_6\text{F}_5)_4]^-$ ), 133.7 (CH, C-4), 135.1 (C, C-12), 137.0 (dm,  $^1J_{\text{C,F}} = 242.9$  Hz, CF,  $[\text{B}(\text{C}_6\text{F}_5)_4]^-$ ), 137.4 (d,  $^3J_{\text{C,F}} = 10.7$  Hz, CH, C-13, C-13'), 139.0 (dm,  $^1J_{\text{C,F}} = 239.7$  Hz, CF,  $[\text{B}(\text{C}_6\text{F}_5)_4]^-$ ), 139.6 (CH, C-7), 141.7 (C, C-11), 148.8 (C, C-10), 149.2 (dm,  $^1J_{\text{C,F}} = 242.9$  Hz, CF,  $[\text{B}(\text{C}_6\text{F}_5)_4]^-$ ), 154.5 (C, C-9), 168.4 (d,  $^1J_{\text{C,F}} = 269.8$  Hz, CF, F-Ph).  **$^{13}\text{C}\{^1\text{H}\}$  NMR** (125.71 MHz, 305.0 K,  $\text{CD}_2\text{Cl}_2$ ):  $\delta = 5.6$  ( $\text{Si}(\text{CH}_3)_2$ ), 30.4 (C-2), 31.3 (C-1), 99.4 (s,  $\underline{\text{C}}\text{-CN}$ ), 116.0 (C, C-5), 119.7 (d,  $^2J_{\text{C,F}} = 23.6$  Hz, CH, C-14, C-14'), 120.2 (C, C-6), 120.7 (CH, C-8), 122.7 (CH, C-3, overlapping with  $\underline{\text{C}}\text{N}$ ), 123.7-125.5 (brs, C,  $[\text{B}(\text{C}_6\text{F}_5)_4]^-$ ), 134.0 (CH, C-4), 135.4 (C, C-12), 136.9 (dm,  $^1J_{\text{C,F}} = 242.5$  Hz, CF,  $[\text{B}(\text{C}_6\text{F}_5)_4]^-$ ), 138.9 (dm,  $^1J_{\text{C,F}} = 244.0$  Hz, CF,  $[\text{B}(\text{C}_6\text{F}_5)_4]^-$ ), 139.1 (d,  $^3J_{\text{C,F}} = 11.2$  Hz, CH, C-13, C-13'), 140.1 (CH, C-7), 142.0 (C, C-11), 148.8 (dm,  $^1J_{\text{C,F}} = 241.6$  Hz, CF,  $[\text{B}(\text{C}_6\text{F}_5)_4]^-$ ), 149.2 (C, C-10), 154.8 (C, C-9), 169.9 (d,  $^1J_{\text{C,F}} = 269.7$  Hz, CF, F-Ph).  **$^{19}\text{F}\{^1\text{H}\}$  NMR** (470.30 MHz, 305.1K,  $\text{C}_7\text{D}_8$ ):  $\delta = -167.4$ -(-167.3) (m, 8 F, *m*-F,  $[\text{B}(\text{C}_6\text{F}_5)_4]^-$ ), -163.4 (t,  $^3J_{\text{F,F}} = 20.6$  Hz, 4 F, *p*-F,  $[\text{B}(\text{C}_6\text{F}_5)_4]^-$ ), -132.8-(-132.5) (m, 8 F, *o*-F,  $[\text{B}(\text{C}_6\text{F}_5)_4]^-$ ), -92.0 (s, 1 F, CF, F-Ph).  **$^{19}\text{F}\{^1\text{H}\}$  NMR** (470.30 MHz, 305.1 K,  $\text{CD}_2\text{Cl}_2$ ):  $\delta = -167.5$ -(-167.2) (m, 8 F, *m*-F,  $[\text{B}(\text{C}_6\text{F}_5)_4]^-$ ), -163.4 (t,  $^3J_{\text{F,F}} = 20.3$  Hz, 4 F, *p*-F,  $[\text{B}(\text{C}_6\text{F}_5)_4]^-$ ), -133.2-(-132.5) (m, 8 F, *o*-F,  $[\text{B}(\text{C}_6\text{F}_5)_4]^-$ ), -87.6 (brs, 1 F, CF, F-Ph).  **$^{29}\text{Si}\{^1\text{H}\}$  INEPT NMR** (99.31 MHz, 305.0 K,  $\text{C}_7\text{D}_8$ ,  $d_3 = 0.0084$ ,  $d_4 = 0.0313$ ):  $\delta = 20.1$  ( $^1J_{\text{Si,C}} = 85.3$  Hz,  $^1J_{\text{Si,C}} = 65.9$  Hz).  **$^{29}\text{Si}\{^1\text{H}\}$  NMR** (99.36 MHz, 300.7 K,  $\text{C}_7\text{D}_8$ ):  $\delta = 20.0$ .  **$^{29}\text{Si}\{^1\text{H}\}$  NMR** (99.31 MHz, 305.0 K,  $\text{CD}_2\text{Cl}_2$ ):  $\delta = 20.8$ .  **$^{11}\text{B}\{^1\text{H}\}$  NMR** (160.38 MHz, 300.8 K,  $\text{C}_7\text{D}_8$ ):  $\delta = -16.8$ .  **$^{11}\text{B}\{^1\text{H}\}$  NMR** (160.38 MHz, 305.0 K,  $\text{CD}_2\text{Cl}_2$ ):  $\delta = -16.5$ .

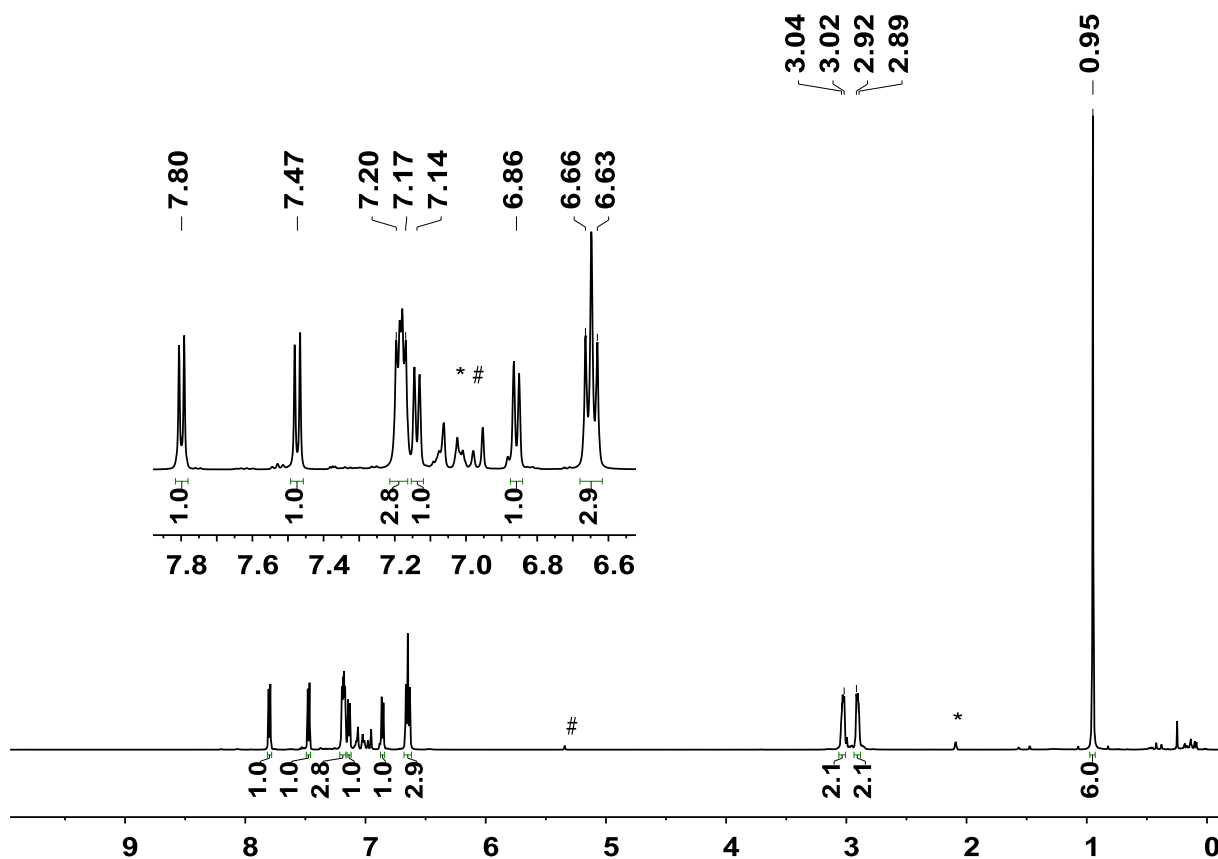

Figure S38 –  $^1\text{H}$  NMR spectrum (500.13 MHz, 301.0 K,  $\text{C}_7\text{D}_8$ , \*  $\text{C}_7\text{D}_7\text{H}$ , # triphenylmethane) of  $10\text{e}[\text{B}(\text{C}_6\text{F}_5)_4]$ .

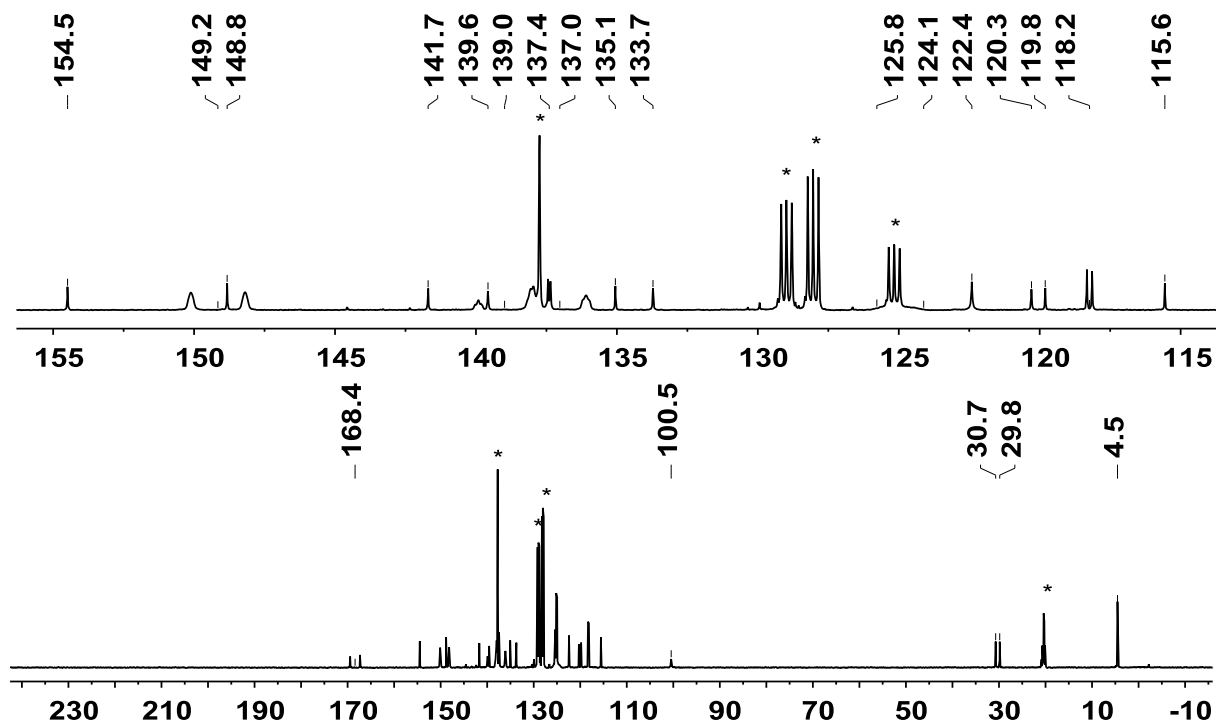

Figure S39 –  $^{13}\text{C}\{^1\text{H}\}$  NMR spectrum (125.77 MHz, 300.8 K, \*  $\text{C}_7\text{D}_8$ ) of  $10\text{e}[\text{B}(\text{C}_6\text{F}_5)_4]$ .

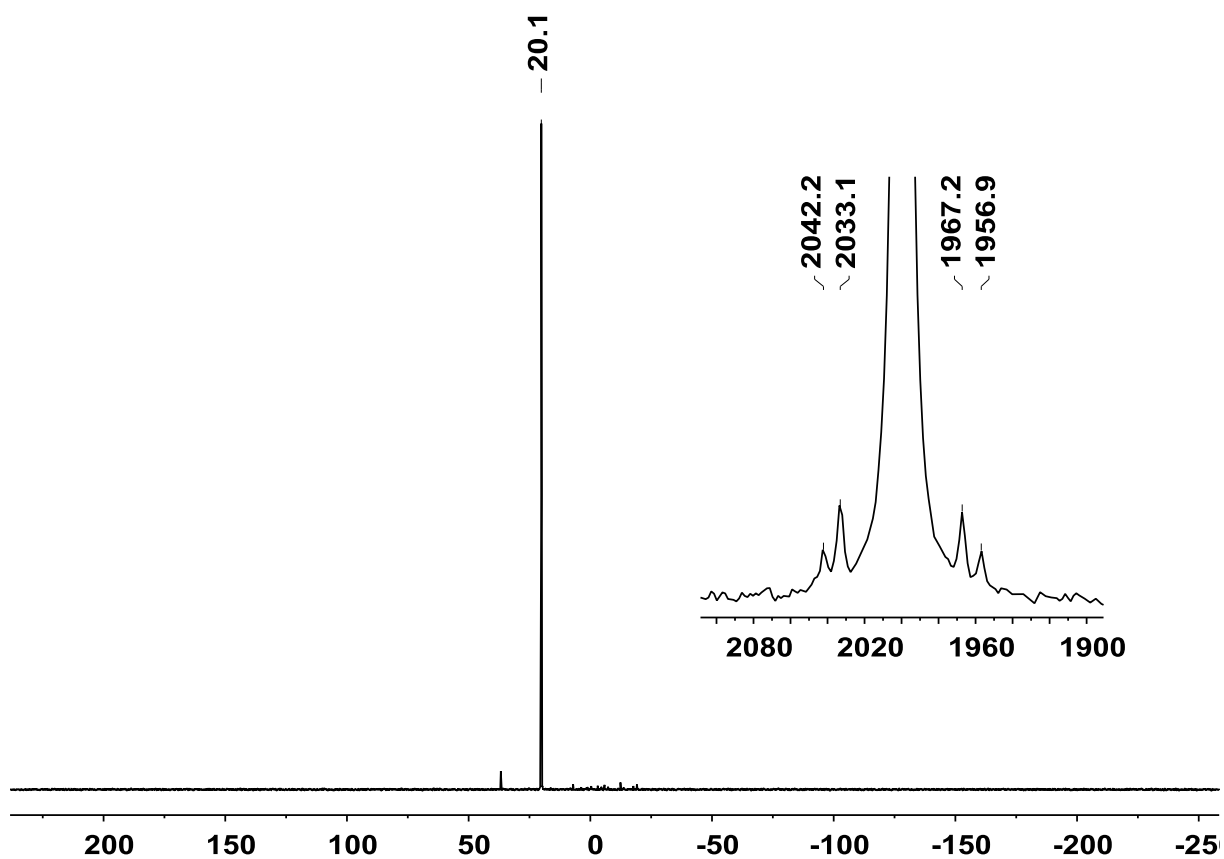

Figure S40 –  $^{29}\text{Si}\{^1\text{H}\}$  INEPT NMR spectrum (99.31 MHz, 305.0 K,  $\text{C}_7\text{D}_8$ ,  $d_3 = 0.0084$ ,  $d_4 = 0.0313$ ) of  $10\text{e}[\text{B}(\text{C}_6\text{F}_5)_4]$ .

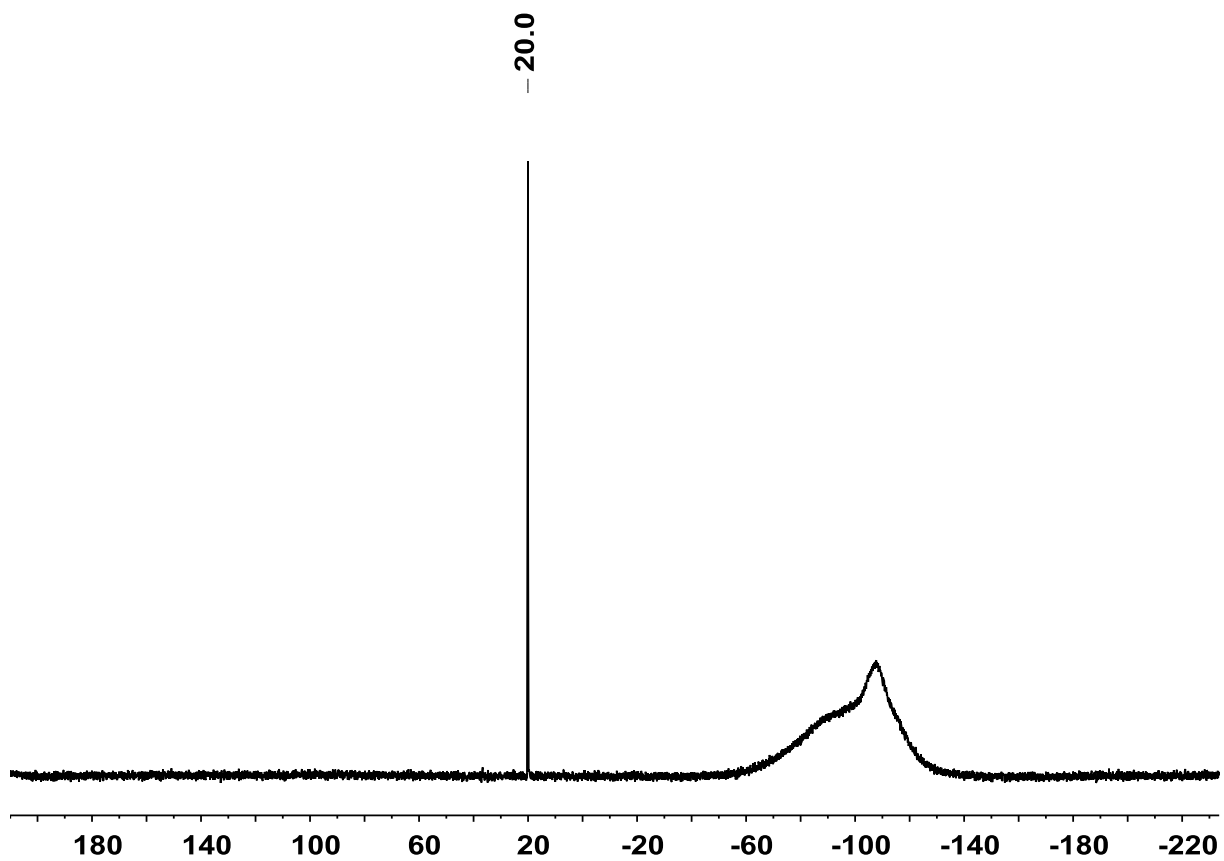

Figure S41 –  $^{29}\text{Si}\{^1\text{H}\}$  NMR spectrum (99.36 MHz, 300.7 K,  $\text{C}_7\text{D}_8$ ) of  $10\text{e}[\text{B}(\text{C}_6\text{F}_5)_4]$ .

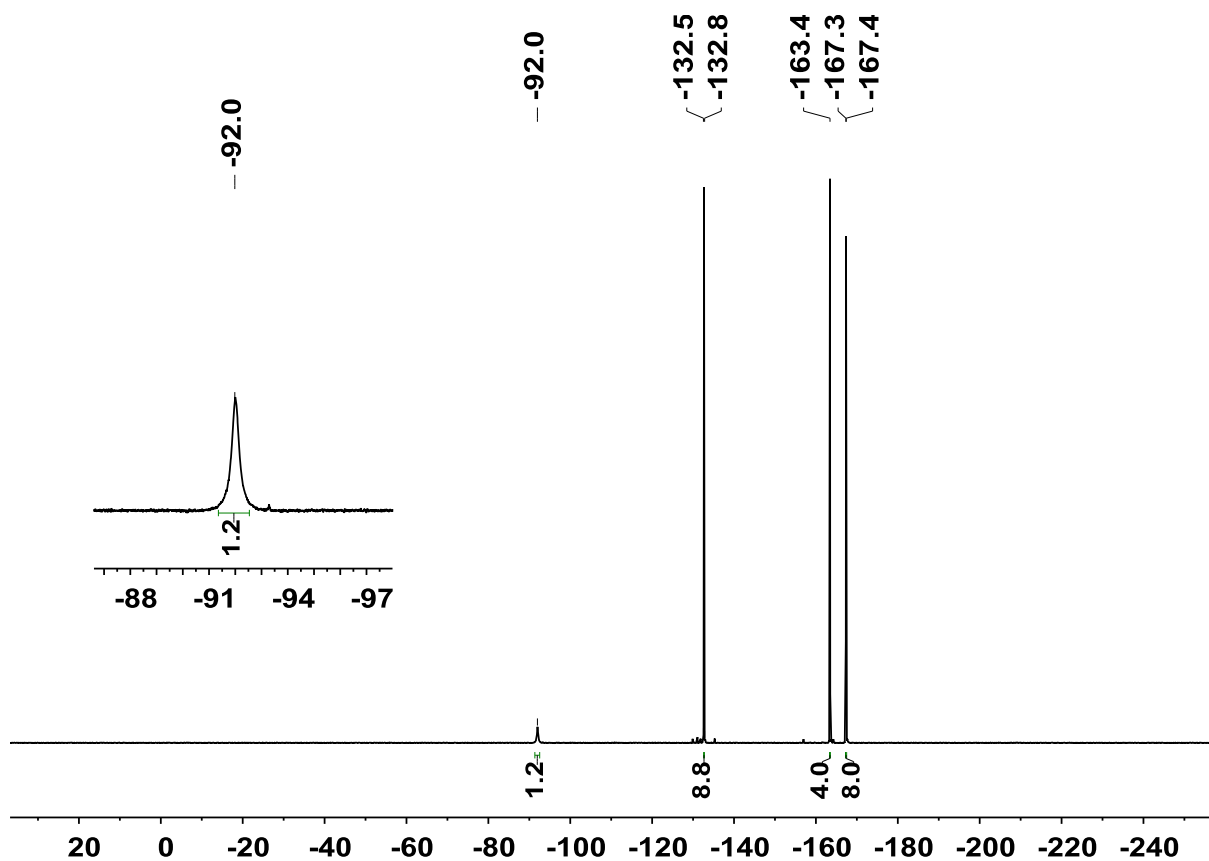

Figure S42 –  $^{19}\text{F}\{^1\text{H}\}$  NMR spectrum (470.30 MHz, 305.1 K,  $\text{C}_7\text{D}_8$ ) of  $10\text{e}[\text{B}(\text{C}_6\text{F}_5)_4]$ .

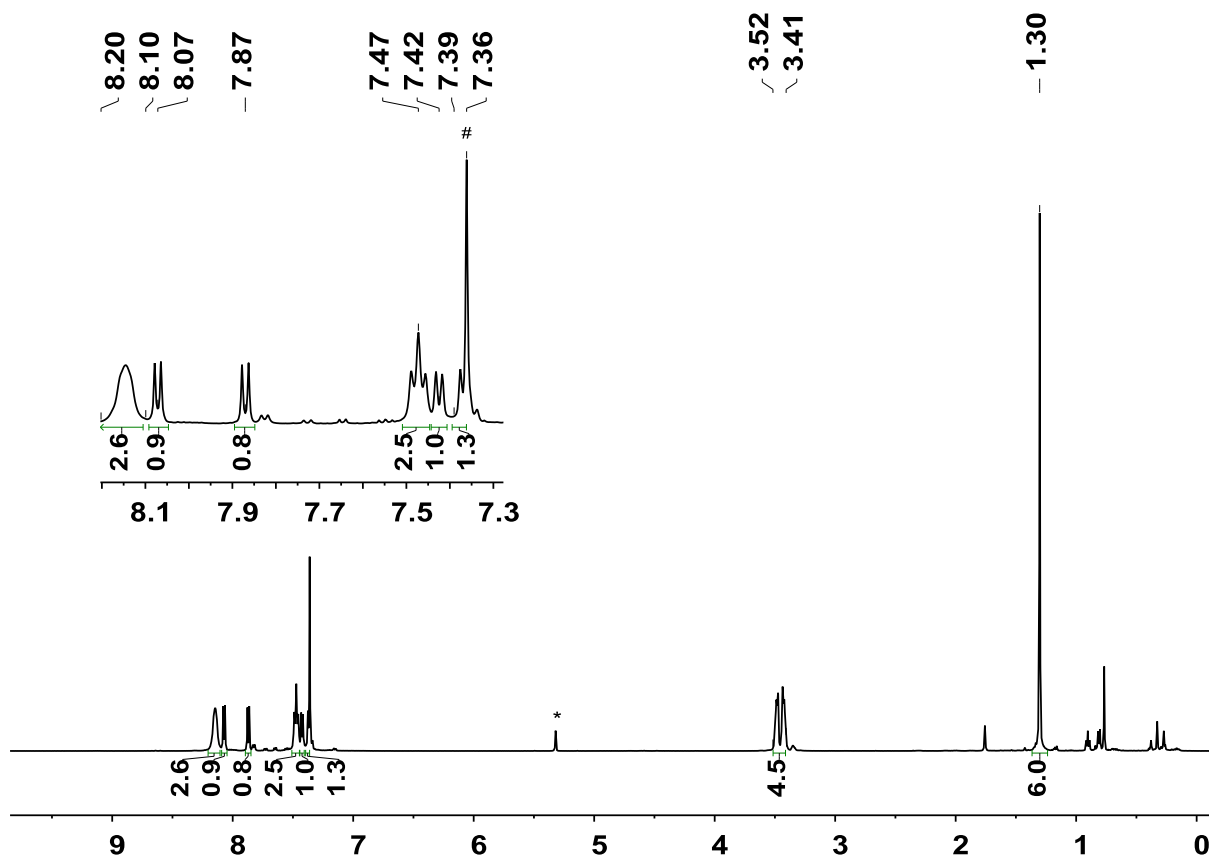

Figure S43 –  $^1\text{H}$  NMR (499.87 MHz, 305.0 K,  $^*\text{CD}_2\text{Cl}_2$ , #  $\text{C}_6\text{H}_6$ ) of  $10\text{e}[\text{B}(\text{C}_6\text{F}_5)_4]$ .

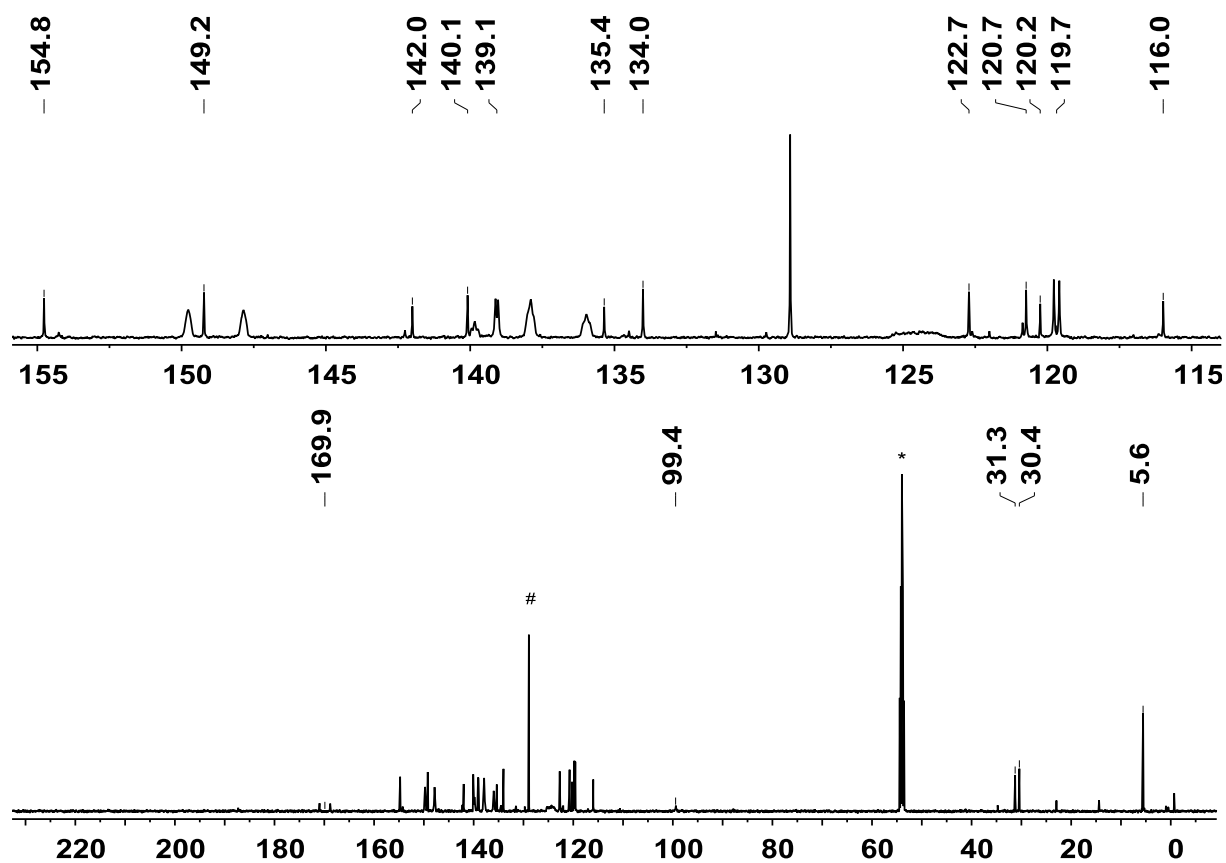

Figure S44 –  $^{13}\text{C}\{^1\text{H}\}$  NMR spectrum (125.71 MHz, 305.0 K,  $^*\text{CD}_2\text{Cl}_2$ , #  $\text{C}_6\text{H}_6$ ) of  $10\text{e}[\text{B}(\text{C}_6\text{F}_5)_4]$ .

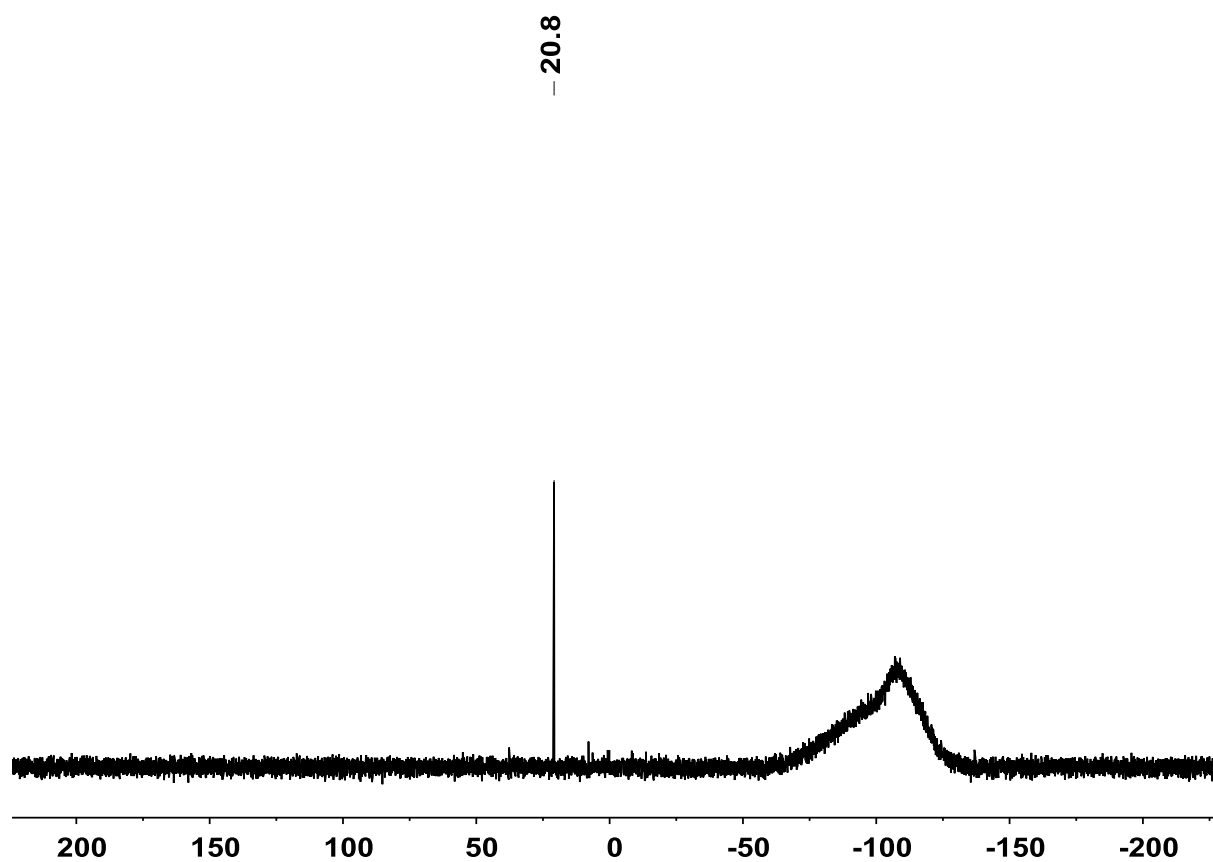

Figure S45 –  $^{29}\text{Si}\{^1\text{H}\}$  NMR spectrum (99.31 MHz, 305.0 K,  $\text{CD}_2\text{Cl}_2$ ) of  $10\text{e}[\text{B}(\text{C}_6\text{F}_5)_4]$ .

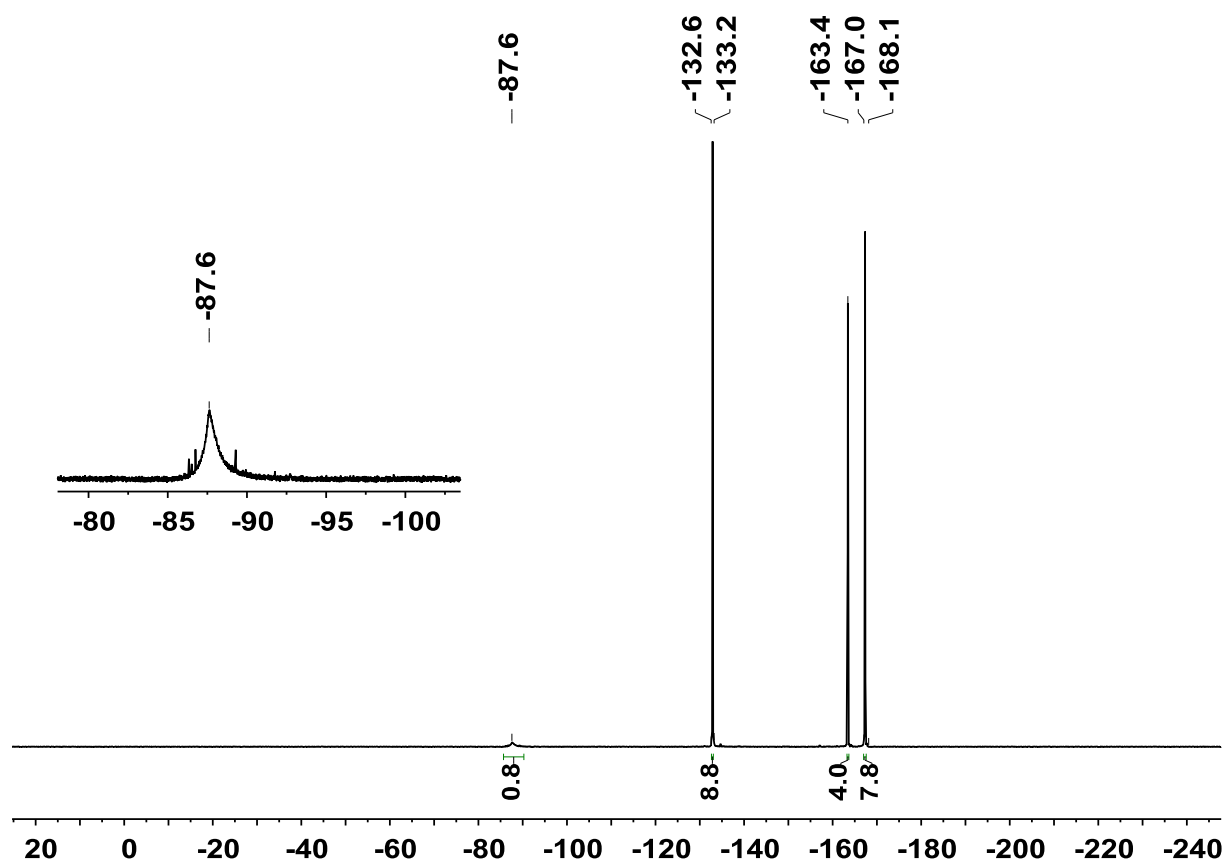

Figure S46 –  $^{19}\text{F}\{^1\text{H}\}$  NMR spectrum (470.30 MHz, 305.1 K,  $\text{CD}_2\text{Cl}_2$ ) of  $10\text{e}[\text{B}(\text{C}_6\text{F}_5)_4]$ .

A solution of trityl borate (1.0 equiv., 370 mg, 401  $\mu\text{mol}$ ) in benzene- $\text{d}_6$  was added to a solution of 1-bromo-8-dimethylsilylnaphthalene (1.2 equiv., 128 mg, 481  $\mu\text{mol}$ ) in benzene- $\text{d}_6$  and stirred for 30 min at room temperature. Then 4-fluorobenzonitrile (1.0 equiv., 49 mg, 401  $\mu\text{mol}$ ) was added and stirred for additional 10 min. Afterwards the upper, nonpolar phase was removed and after removing the solvent under reduced pressure, the residue was dissolved in dichloromethane- $\text{d}_2$  and nitrilium borate  $11\text{e}[\text{B}(\text{C}_6\text{F}_5)_4]$  was analyzed by NMR spectroscopy.

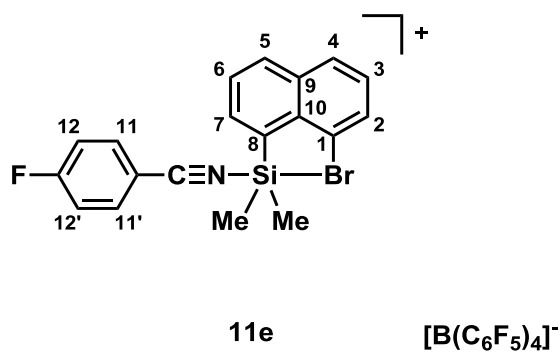



**$^1\text{H}$  NMR** (499.87 MHz, 305.1 K,  $\text{CD}_2\text{Cl}_2$ ):  $\delta$  = 1.39 (s, 6H,  $\text{Si}(\text{CH}_3)_2$ ), 7.48-7.51 (m, 2H, H-12, H-12'), 7.55 (t, 1H,  $^3J_{\text{H,H}} = 7.9$  Hz, H-3), 7.65 (t, 1H,  $^3J_{\text{H,H}} = 7.6$  Hz, H-6), 7.98 (d, 1H,  $^3J_{\text{H,H}} = 7.7$  Hz, H-2), 8.05 (d, 1H,  $^3J_{\text{H,H}} = 8.0$  Hz, H-4), 8.16 (d, 1H,  $^3J_{\text{H,H}} = 8.2$  Hz, H-5), 8.18-8.21 (m, 2H, H-11, H-11'), 8.27 (d, 1H,  $^3J_{\text{H,H}} = 7.2$  Hz, H-7).  **$^{13}\text{C}\{^1\text{H}\}$  NMR** (125.71 MHz, 305.0 K,  $\text{CD}_2\text{Cl}_2$ ):  $\delta$  = 6.5 ( $^1J_{\text{C,Si}} = 68.2$  Hz,  $\text{Si}(\text{CH}_3)_2$ ), 99.2 (s,  $\underline{\text{C}}\text{-CN}$ ), 119.7 (d,  $^2J_{\text{C,F}} = 23.7$  Hz, CH, C-12, C-12'), 121.9 (C, C-1), 123.7 ( $\underline{\text{C}}\text{N}$ ), 124.0-125.6 (brs, C,  $[\text{B}(\text{C}_6\text{F}_5)_4]^-$ ), 126.6 (CH, C-6), 127.0 (C, C-8), 128.2 (CH, C-3), 130.9 (CH, C-4), 132.2 (CH, C-2), 134.9 (CH, C-5), 136.6 (C, C-9 or C-10), 136.9 (C, C-9 or C-10), 137.0 (dm,  $^1J_{\text{C,F}} = 242.7$  Hz, CF,  $[\text{B}(\text{C}_6\text{F}_5)_4]^-$ ), 138.1 (CH, C-7), 139.0 (dm,  $^1J_{\text{C,F}} = 240.0$  Hz, CF,  $[\text{B}(\text{C}_6\text{F}_5)_4]^-$ ), 139.1 (d,  $^3J_{\text{C,F}} = 11.2$  Hz, CH, C-11, C-11'), 148.9 (dm,  $^1J_{\text{C,F}} = 240.6$  Hz, CF,  $[\text{B}(\text{C}_6\text{F}_5)_4]^-$ ), 170.0 (d,  $^1J_{\text{C,F}} = 269.1$  Hz, CF, F-Ph).  **$^{19}\text{F}\{^1\text{H}\}$  NMR** (470.30 MHz, 305.1 K,  $\text{CD}_2\text{Cl}_2$ ):  $\delta$  = -167.4-(-167.3) (m, 8 F, *m*-F,  $[\text{B}(\text{C}_6\text{F}_5)_4]^-$ ), -163.4 (t,  $^3J_{\text{F,F}} = 20.4$  Hz, 4 F, *p*-F,  $[\text{B}(\text{C}_6\text{F}_5)_4]^-$ ), -133.6-(-132.7) (m, 8 F, *o*-F,  $[\text{B}(\text{C}_6\text{F}_5)_4]^-$ ), -88.0 (brs, 1 F, CF, F-Ph).  **$^{29}\text{Si}\{^1\text{H}\}$  INEPT NMR** (99.31 MHz, 305.0 K,  $\text{CD}_2\text{Cl}_2$ ,  $d_3 = 0.0084$ ,  $d_4 = 0.0313$ ):  $\delta$  = 14.8 ( $^1J_{\text{Si,C}} = 85.5$  Hz,  $^1J_{\text{Si,C}} = 68.3$  Hz).  **$^{29}\text{Si}\{^1\text{H}\}$  NMR** (99.31 MHz, 305.0 K,  $\text{CD}_2\text{Cl}_2$ ):  $\delta$  = 14.8.  **$^{11}\text{B}\{^1\text{H}\}$  NMR** (160.38 MHz, 305.0 K,  $\text{CD}_2\text{Cl}_2$ ):  $\delta$  = -16.5.

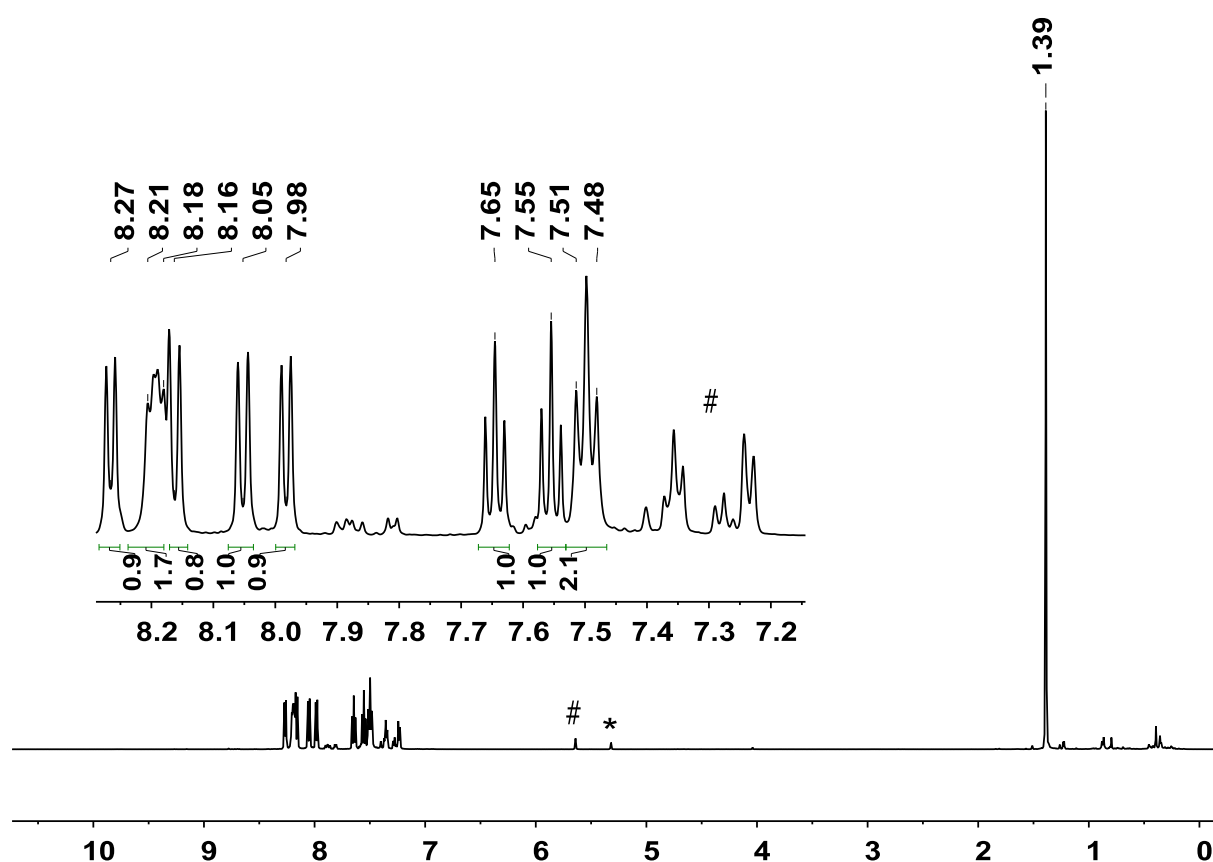

Figure S47 –  $^1\text{H}$  NMR (499.87 MHz, 305.1 K,  $^*\text{CD}_2\text{Cl}_2$ , #  $\text{Ph}_3\text{CH}$ ) of  $11\text{e}[\text{B}(\text{C}_6\text{F}_5)_4]$ .

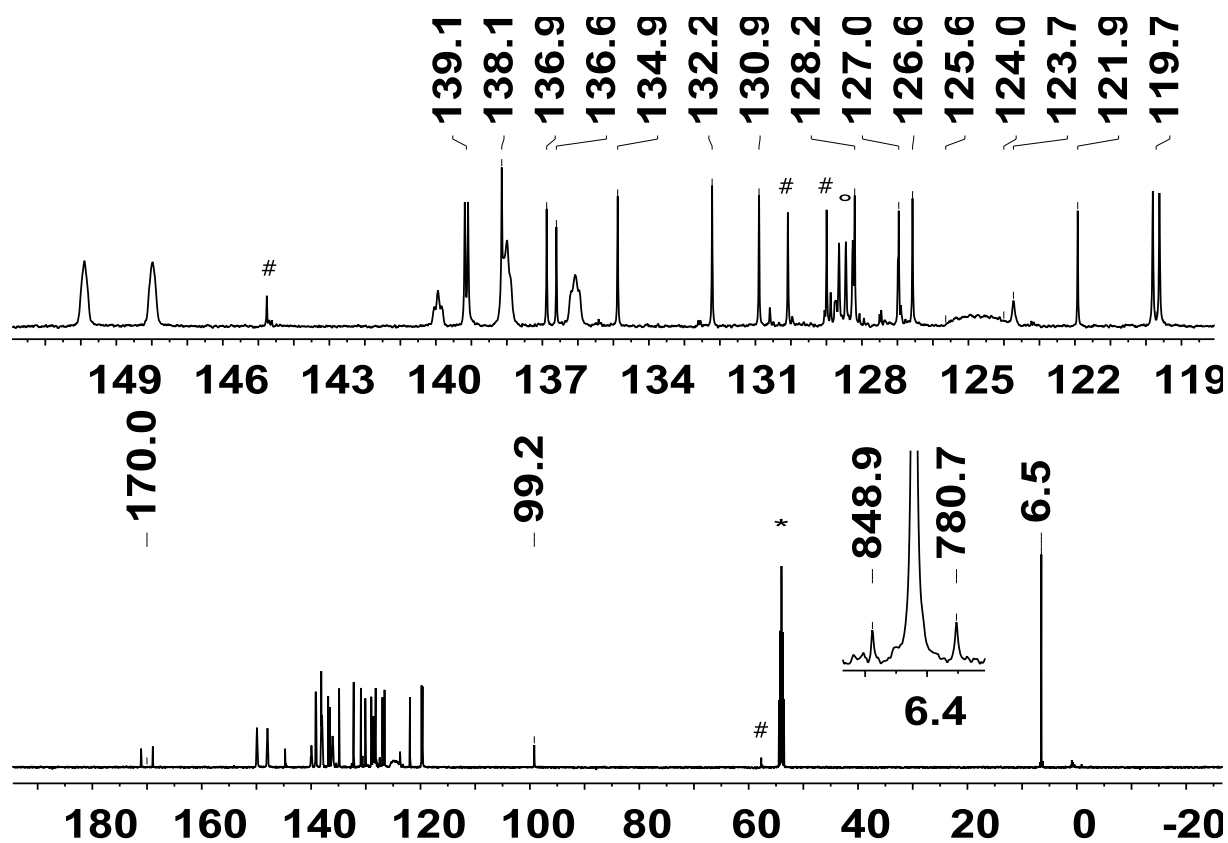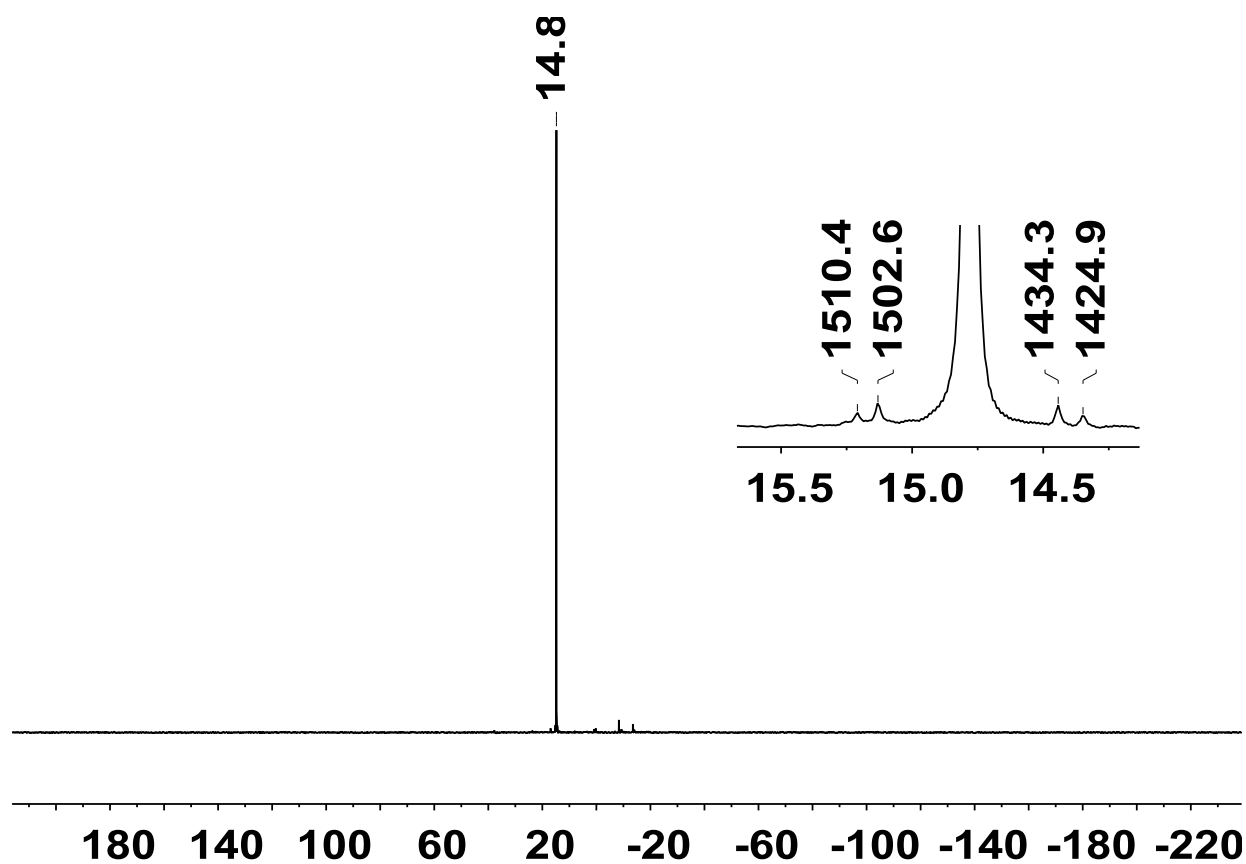

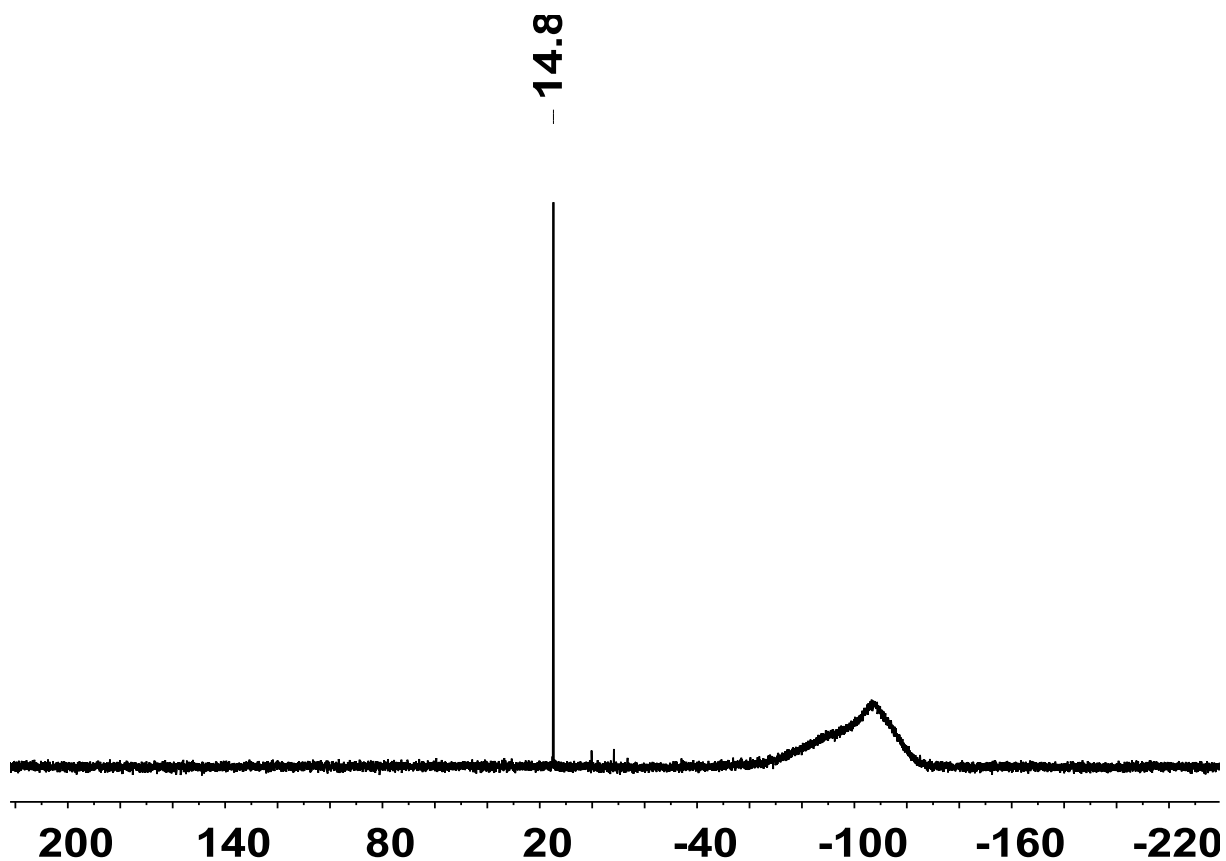

Figure S50 –  $^{29}\text{Si}\{^1\text{H}\}$  NMR spectrum (99.31 MHz, 305.0 K,  $\text{CD}_2\text{Cl}_2$ ) of  $11\text{e}[\text{B}(\text{C}_6\text{F}_5)_4]$ .

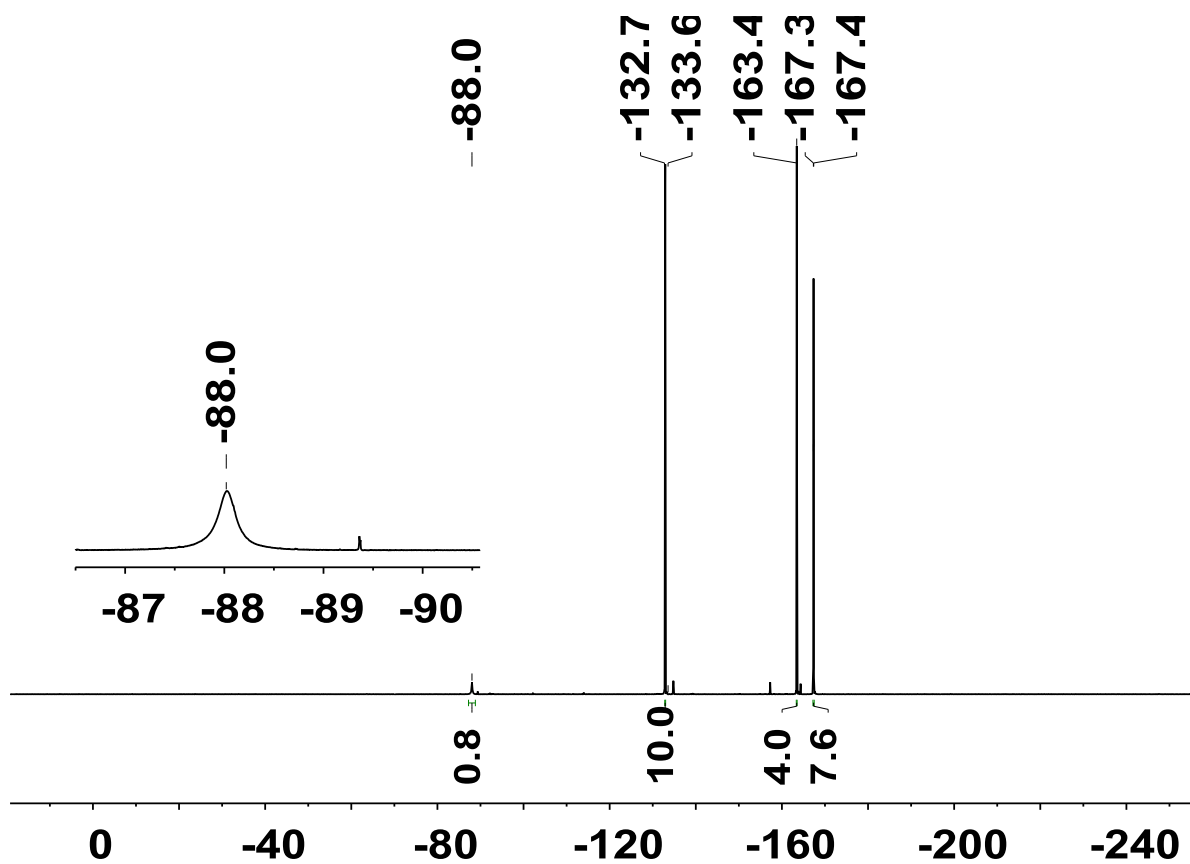

Figure S51 –  $^{19}\text{F}\{^1\text{H}\}$  NMR spectrum (470.30 MHz, 305.1 K,  $\text{CD}_2\text{Cl}_2$ ) of  $11\text{e}[\text{B}(\text{C}_6\text{F}_5)_4]$ .

## Iodine

A solution of trityl borate (1.0 equiv., 370 mg, 401  $\mu\text{mol}$ ) in benzene was added to a solution of a reaction mixture containing 5-iodo-6-dimethylsilylacenaphthene **7f** as main product (248 mg) in benzene and stirred for 30 min at room temperature. Here the reaction mixture containing 5-iodo-6-dimethylsilylacenaphthene **7f** was used in excess compared to the amount of the trityl borate. The upper, nonpolar phase was removed and the polar phase was washed with benzene two times and then with *n*-pentane to remove organic impurities and excess of silane **7f**. Afterwards the solvent was removed under reduced pressure, the residue was dissolved in benzene- $d_6$  and analyzed by NMR spectroscopy. Then 4-fluorobenzonitrile (1.0 equiv., 49 mg, 401  $\mu\text{mol}$ ) was added to the reaction mixture and stirred for 15 min. The polar phase was washed up to two times with *n*-pentane. After removing the solvent under reduced pressure, the residue was dissolved in dichloromethane- $d_2$  and nitrilium borate **10f**[ $\text{B}(\text{C}_6\text{F}_5)_4$ ] was analyzed by NMR spectroscopy.

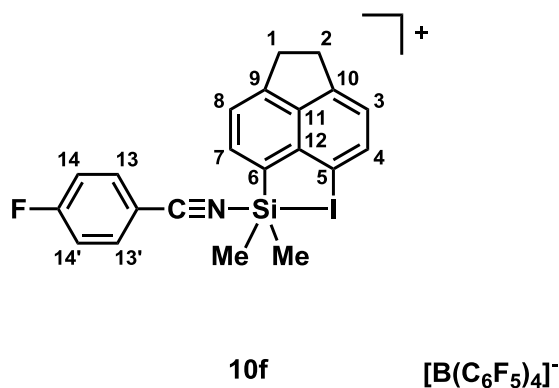

**$^1\text{H}$  NMR** (499.87 MHz, 305.0 K,  $\text{CD}_2\text{Cl}_2$ ):  $\delta$  = 1.47 (s, 6H,  $\text{Si}(\text{CH}_3)_2$ ), 3.39-3.55 (m, 4H, 2 x  $\text{CH}_2$ , H-1, H-2), 7.26 (d, 1H,  $^3J_{\text{H,H}} = 6.8$  Hz, H-3), 7.39-7.44 (m, 3H, H-8, H-14, H-14'), 8.04-8.11 (m, 2H, H-13, H-13'), 8.13 (d, 1H,  $^3J_{\text{H,H}} = 7.1$  Hz, H-7), 8.16 (d, 1H,  $^3J_{\text{H,H}} = 7.1$  Hz, H-4).  **$^{13}\text{C}\{^1\text{H}\}$  NMR** (125.71 MHz, 305.0 K,  $\text{CD}_2\text{Cl}_2$ ):  $\delta$  = 7.9 ( $\text{Si}(\underline{\text{C}}\text{H}_3)_2$ ), 30.4 ( $\text{CH}_2$ ), 30.9 ( $\text{CH}_2$ ), 90.4 (C, C-5), 101.0 (s,  $\underline{\text{C}}-\text{CN}$ ), 119.3 (d,  $^2J_{\text{C,F}} = 23.5$  Hz, CH, C-14, C-14'), 120.6 (CH, C-8), 122.7 ( $\underline{\text{C}}\text{N}$ ), 123.2 (C, C-6), 123.5 (CH, C-3), 123.8-125.6 (brs, C, [ $\text{B}(\text{C}_6\text{F}_5)_4$ ]), 137.0 (dm,  $^1J_{\text{C,F}} = 240.8$  Hz, CF, [ $\text{B}(\text{C}_6\text{F}_5)_4$ ]), 138.4 (d,  $^3J_{\text{C,F}} = 10.9$  Hz, CH, C-13, C-13'), 138.9 (dm,  $^1J_{\text{C,F}} = 244.3$  Hz, CF, [ $\text{B}(\text{C}_6\text{F}_5)_4$ ]), 139.5 (C, C-12), 140.6 (CH, C-7), 142.0 (CH, C-4), 142.1 (C, C-11), 148.9 (dm,  $^1J_{\text{C,F}} = 240.5$  Hz, CF, [ $\text{B}(\text{C}_6\text{F}_5)_4$ ]), 150.2 (C, C-10), 155.1 (C, C-9), 169.2 (d,  $^1J_{\text{C,F}} = 266.7$  Hz, CF, F-Ph).

$^{19}\text{F}\{^1\text{H}\}$  NMR (470.30 MHz, 305.1 K,  $\text{CD}_2\text{Cl}_2$ ):  $\delta = -167.4$ -(-167.3) (m, 8F, *m*-F,  $[\text{B}(\text{C}_6\text{F}_5)_4]$ ), -163.4 (t,  $^3J_{\text{F},\text{F}} = 20.4$  Hz, 4F, *p*-F,  $[\text{B}(\text{C}_6\text{F}_5)_4]$ ), -133.3-(-132.6) (m, 8F, *o*-F,  $[\text{B}(\text{C}_6\text{F}_5)_4]$ ), -90.9 (brs, 1F, CF, F-Ph).  $^{29}\text{Si}\{^1\text{H}\}$  NMR (99.31 MHz, 305.0 K,  $\text{CD}_2\text{Cl}_2$ ):  $\delta = 20.0$ .  $^{11}\text{B}\{^1\text{H}\}$  NMR (160.38 MHz, 305.0 K,  $\text{CD}_2\text{Cl}_2$ ):  $\delta = -16.5$ .

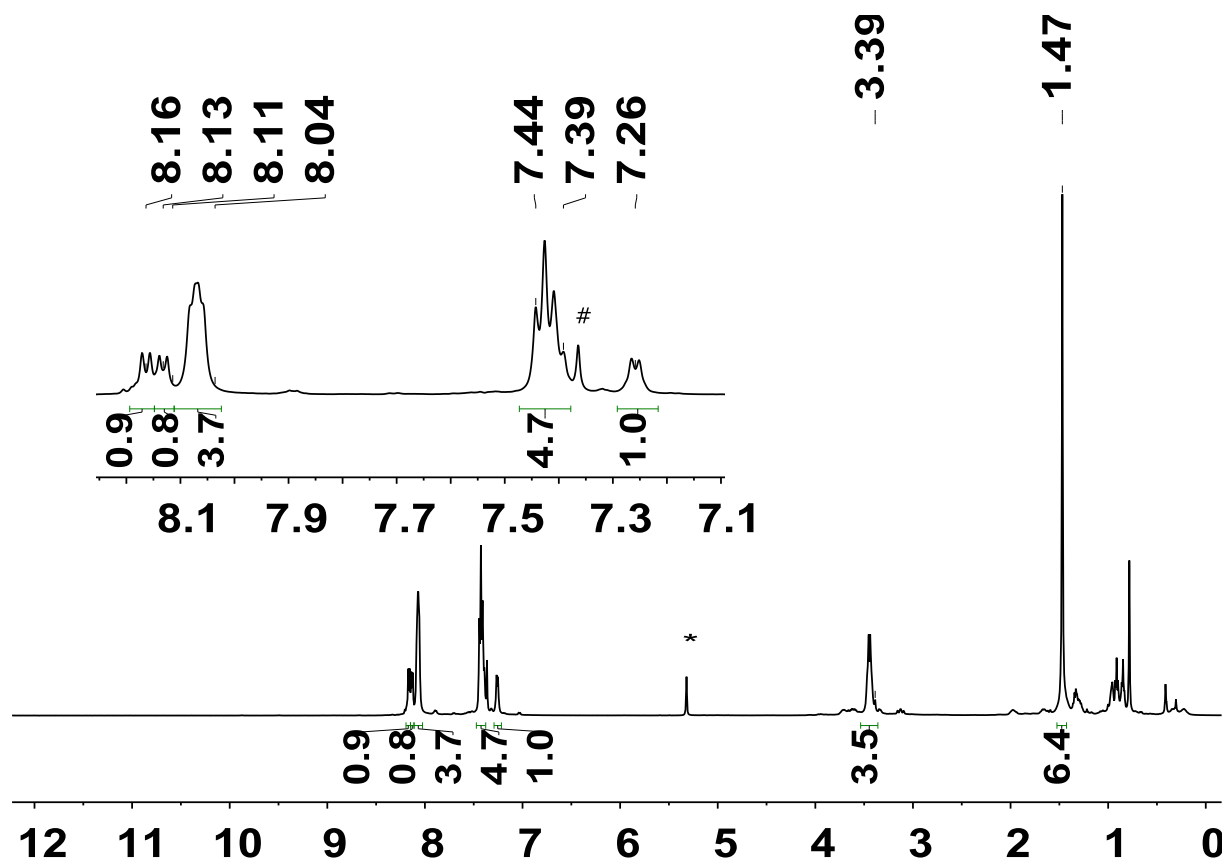

Figure S52 –  $^1\text{H}$  NMR (499.87 MHz, 305.0 K,  $^*\text{CD}_2\text{Cl}_2$ , #  $\text{C}_6\text{D}_6$ ) of  $10f[\text{B}(\text{C}_6\text{F}_5)_4]$ .

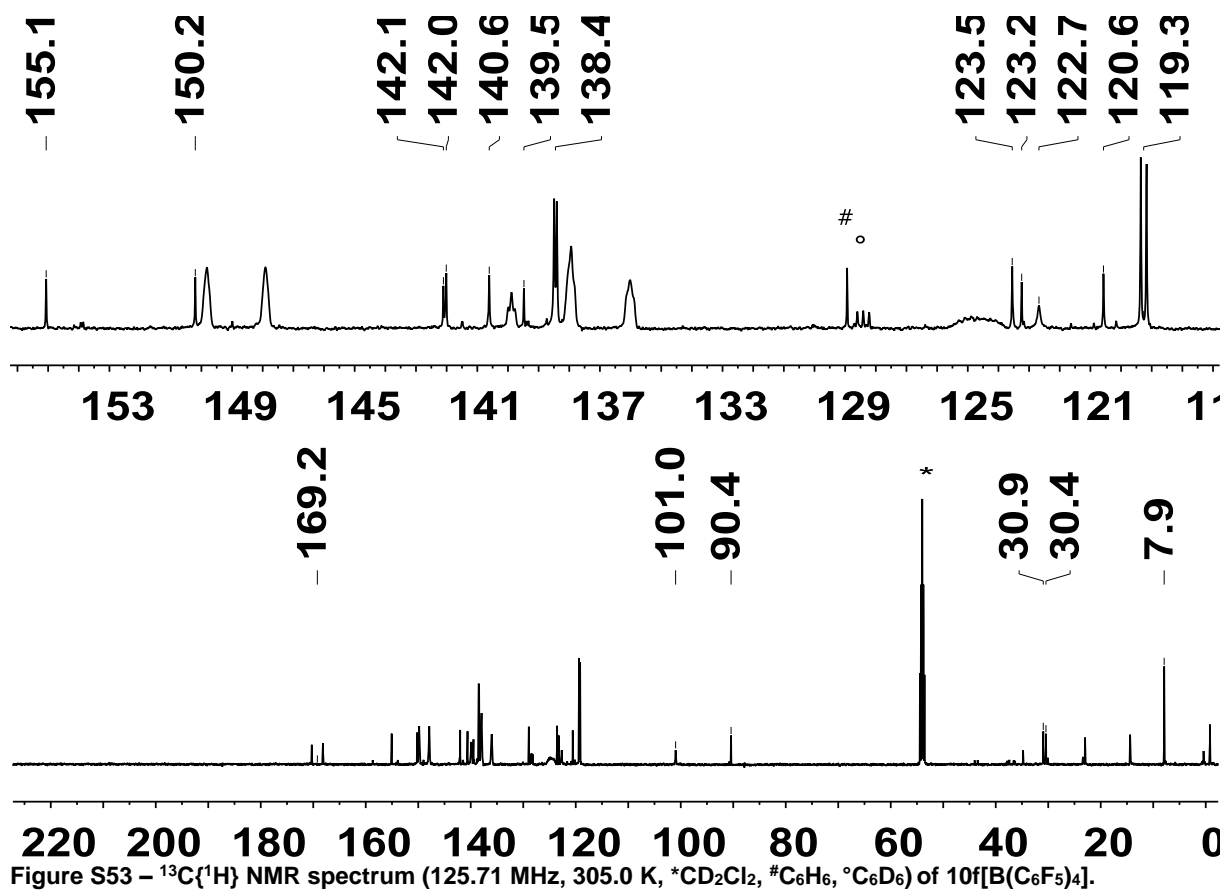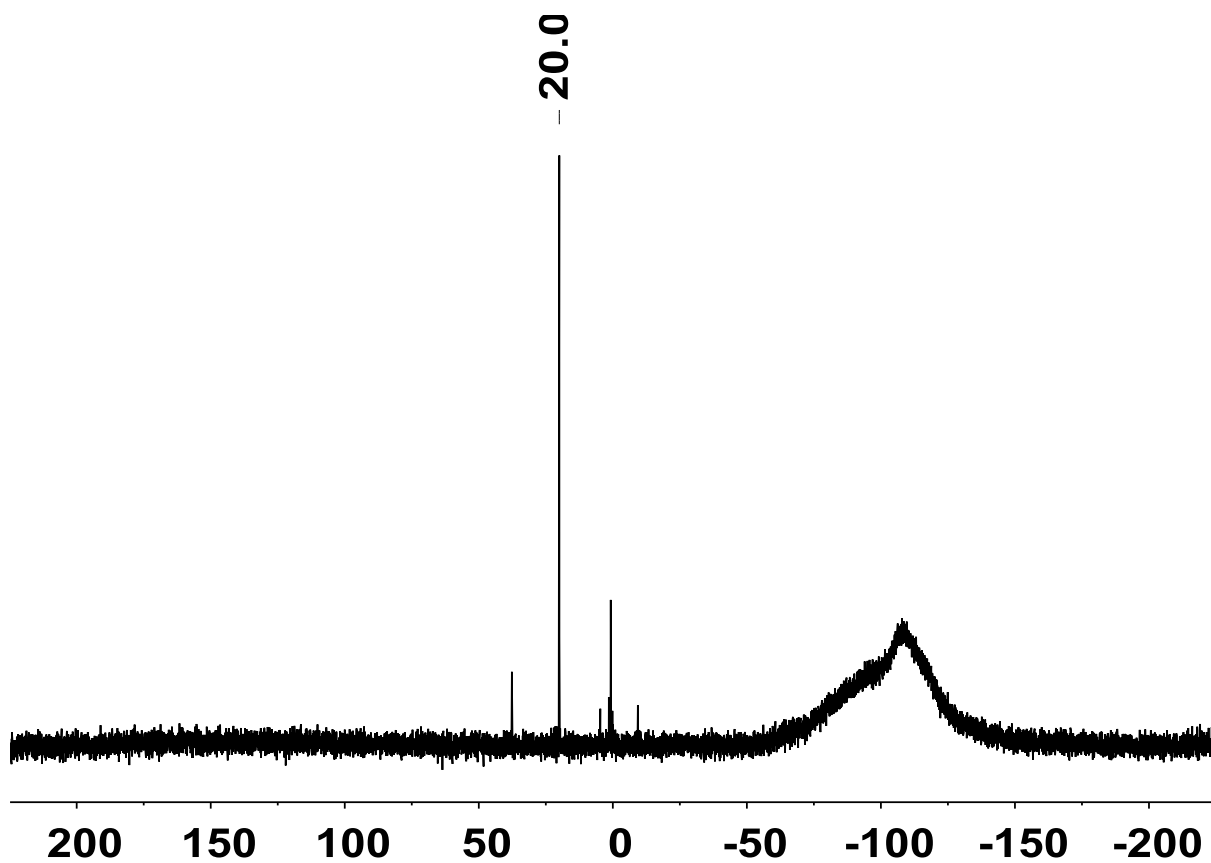

Figure S54 –  $^{29}\text{Si}\{^1\text{H}\}$  NMR spectrum (99.31 MHz, 305.0 K,  $\text{CD}_2\text{Cl}_2$ ) of  $10f[\text{B}(\text{C}_6\text{F}_5)_4]$ .

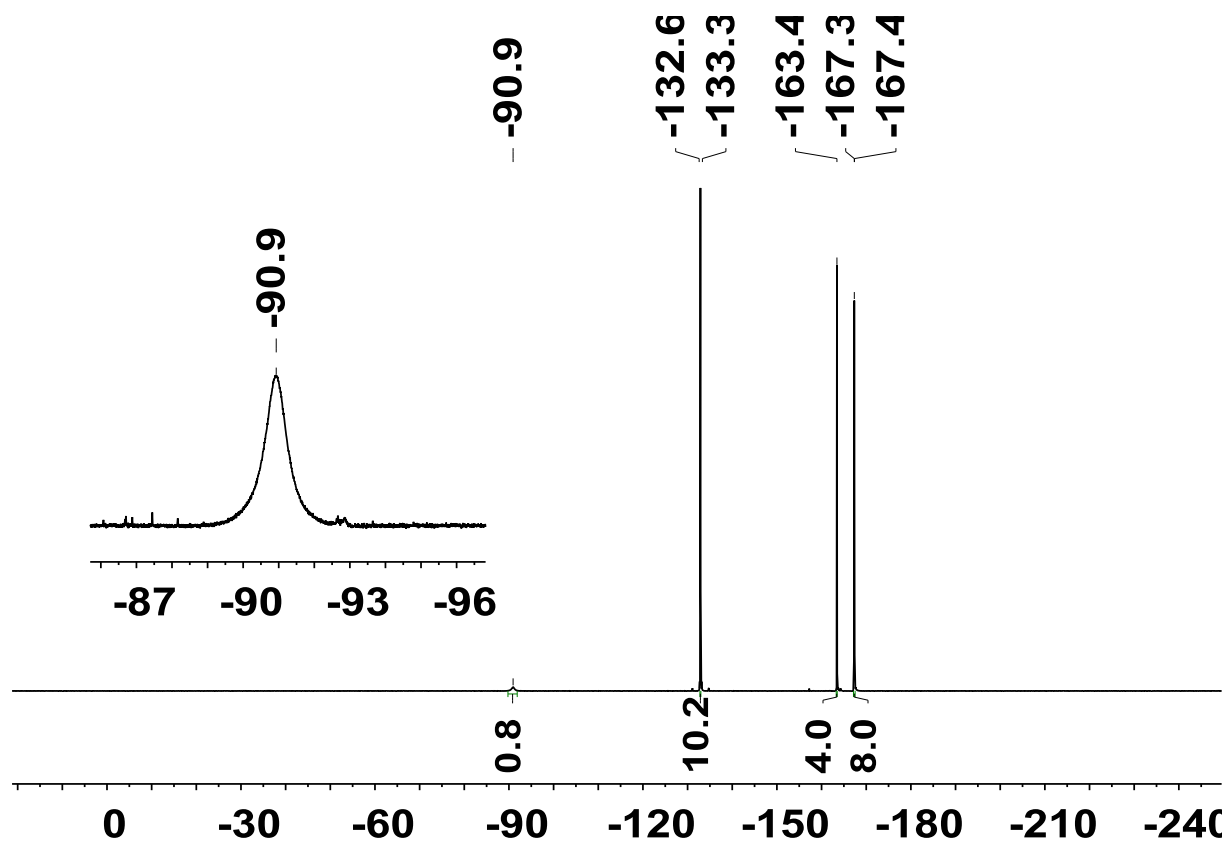

Figure S55 –  $^{19}\text{F}\{^1\text{H}\}$  NMR spectrum (470.30 MHz, 305.1 K,  $\text{CD}_2\text{Cl}_2$ ) of  $10\text{f}[\text{B}(\text{C}_6\text{F}_5)_4]$ .

### Without donor

Nitrilium borate **6**[B(C<sub>6</sub>F<sub>5</sub>)<sub>4</sub>]<sup>-</sup> was synthesized according to general procedure **B** using 1.0 equiv. 5-dimethylsilylacenaphthene (250.00 μmol, 53 mg), 1.0 equiv. trityl borate (250.00 μmol, 230 mg) and 1.0 equiv. 4-fluorobenzonitrile (250.00 μmol, 30 mg). Nitrilium ion **6** is not stable and decomposes within one day.

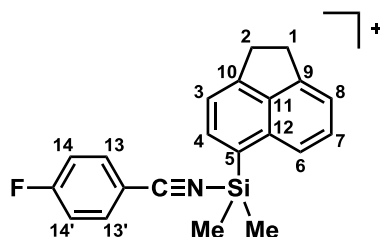

**6**

[B(C<sub>6</sub>F<sub>5</sub>)<sub>4</sub>]<sup>-</sup>

**<sup>1</sup>H NMR** (499.87 MHz, 305.1 K, CD<sub>2</sub>Cl<sub>2</sub>): δ = 1.26 (s, 6 H, Si(CH<sub>3</sub>)<sub>2</sub>), 3.53 (brs, 4 H, 2 × CH<sub>2</sub>), 7.40-7.44 (m, 2 H, H-14, H-14'), 7.50 (d, <sup>3</sup>J<sub>H,H</sub> = 6.9 Hz, 1 H, H-3), 7.54 (d, <sup>3</sup>J<sub>H,H</sub> = 7.0 Hz, 1 H, H-8), 7.71-7.74 (m, 1 H, H-7), 7.84 (d, <sup>3</sup>J<sub>H,H</sub> = 8.3 Hz, 1 H, H-6), 7.93 (d, <sup>3</sup>J<sub>H,H</sub> = 6.9 Hz, 1 H, H-4), 8.01-8.06 (m, 2 H, H-13, H-13'). **<sup>13</sup>C{<sup>1</sup>H} NMR** (125.71 MHz, 305.0 K, CD<sub>2</sub>Cl<sub>2</sub>): δ = -0.9 (Si(CH<sub>3</sub>)<sub>2</sub>), 30.9 (CH<sub>2</sub>), 97.8 (C-CN), 118.9 (C, C-5), 119.8, 120.1 (CH, C-3, C-14, C-14', overlapping with CN), 121.0 (CH, C-6), 121.6 (CH, C-8), 132.8-125.7 (brs, C, [B(C<sub>6</sub>F<sub>5</sub>)<sub>4</sub>]<sup>-</sup>), 130.8 (CH, C-7), 134.7 (C, C-12), 137.0 (dm, <sup>1</sup>J<sub>C,F</sub> = 242.2 Hz, CF, [B(C<sub>6</sub>F<sub>5</sub>)<sub>4</sub>]<sup>-</sup>), 138.8 (CH, C-4), 139.0 (dm, <sup>1</sup>J<sub>C,F</sub> = 233.2 Hz, CF, [B(C<sub>6</sub>F<sub>5</sub>)<sub>4</sub>]<sup>-</sup>), 139.9 (d, <sup>3</sup>J<sub>C,F</sub> = 10.3 Hz, C-13, C-13'), 146.8 (C, C-11), 148.9 (dm, <sup>1</sup>J<sub>C,F</sub> = 241.0 Hz, CF, [B(C<sub>6</sub>F<sub>5</sub>)<sub>4</sub>]<sup>-</sup>), 149.4 (C, C-9), 154.9 (C, C-10), 170.4 (d, <sup>1</sup>J<sub>C,F</sub> = 277.5 Hz, CF). **<sup>19</sup>F{<sup>1</sup>H} NMR** (470.28 MHz, 305.0 K, CD<sub>2</sub>Cl<sub>2</sub>): δ = -167.5-(-167.2) (m, 8 F, *m*-F, [B(C<sub>6</sub>F<sub>5</sub>)<sub>4</sub>]<sup>-</sup>), -163.44 (t, <sup>3</sup>J<sub>F,F</sub> = 20.4 Hz, 4 F, *o*-F, [B(C<sub>6</sub>F<sub>5</sub>)<sub>4</sub>]<sup>-</sup>), -133.0-(-132.8) (m, 8 F, *o*-F, [B(C<sub>6</sub>F<sub>5</sub>)<sub>4</sub>]<sup>-</sup>), -86.6 (s, 1 F, CF). **<sup>29</sup>Si{<sup>1</sup>H} NMR** (99.31 MHz, 305.0 K, CD<sub>2</sub>Cl<sub>2</sub>): δ = 23.0. **<sup>11</sup>B{<sup>1</sup>H} NMR** (160.38 MHz, 305.1 K, CD<sub>2</sub>Cl<sub>2</sub>): δ = -16.4.



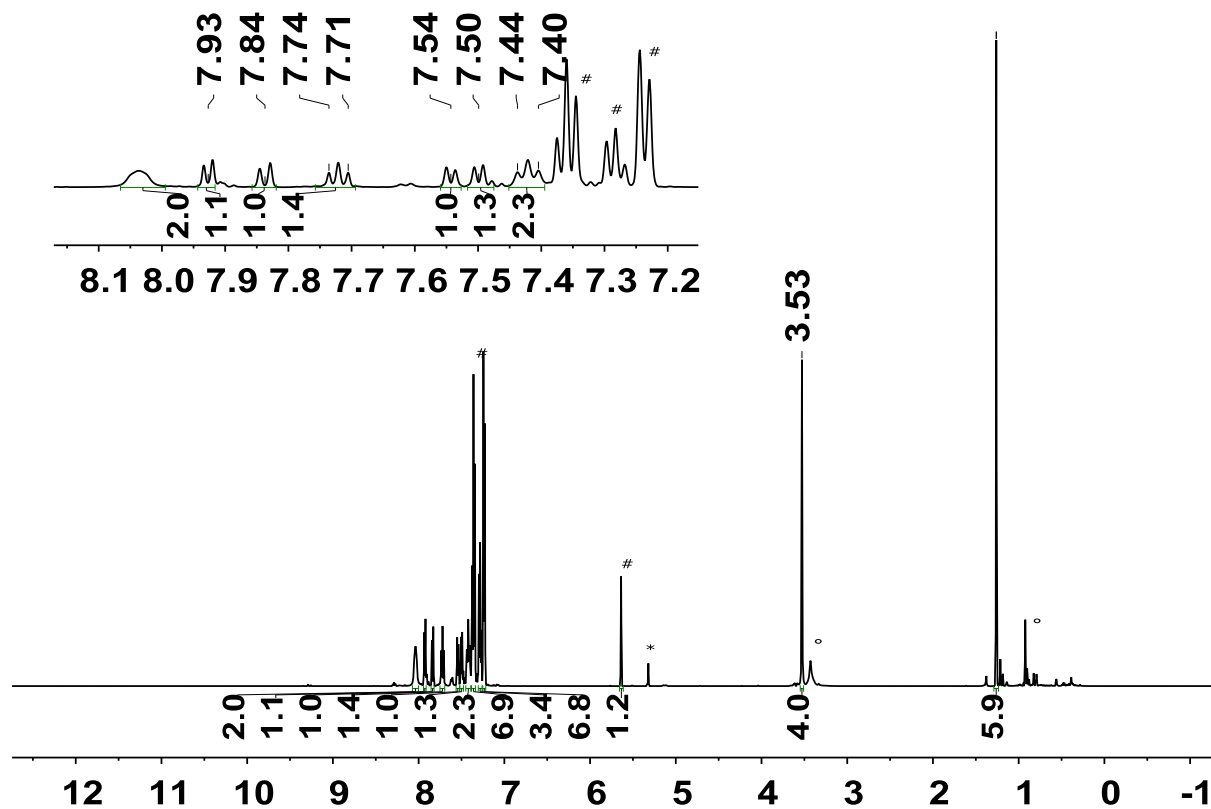

Figure S56 – <sup>1</sup>H NMR spectrum (499.87 MHz, 305.0 K, CD<sub>2</sub>Cl<sub>2</sub>, lb: -2.3 Hz, gb: 2.6, \* CDHCl<sub>2</sub>, # Ph<sub>3</sub>CH, ° impurities/decomposition) of 6[B(C<sub>6</sub>F<sub>5</sub>)<sub>4</sub>].

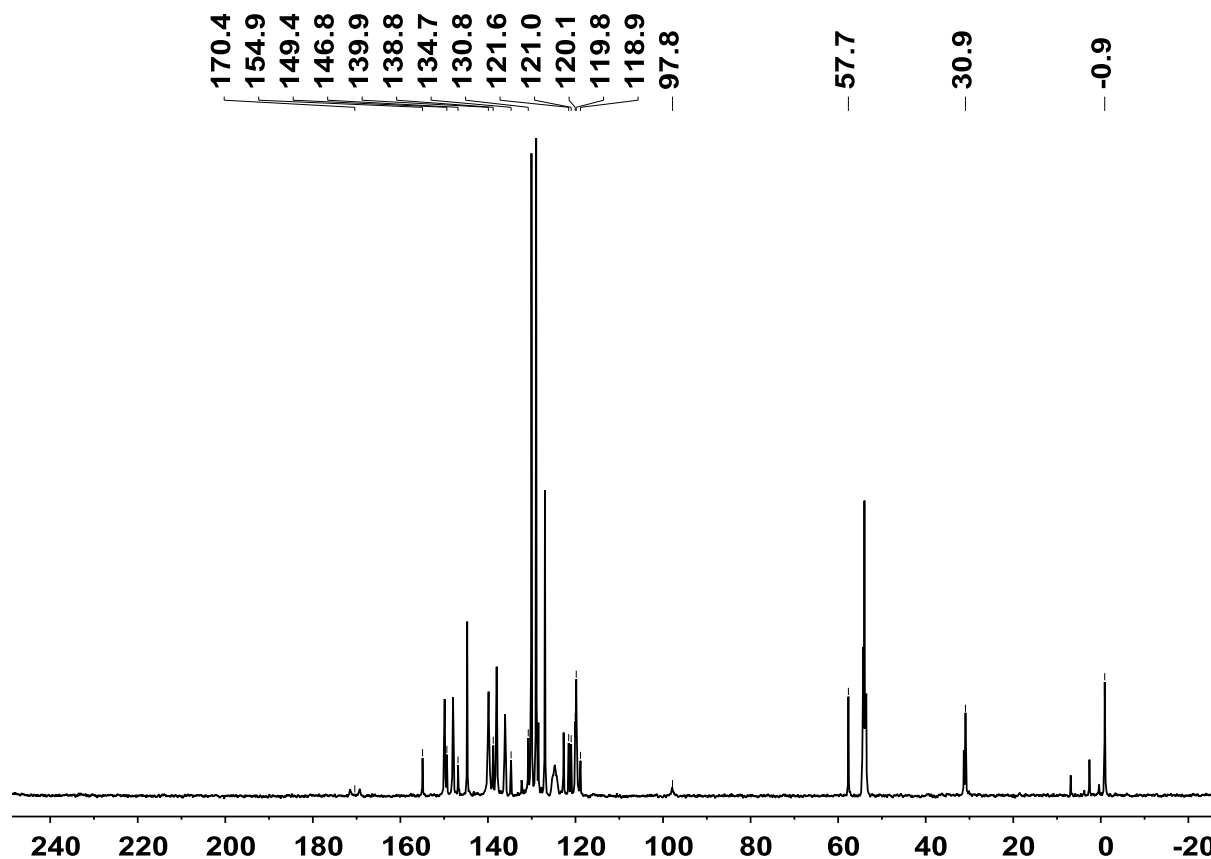

Figure S57 – <sup>13</sup>C{<sup>1</sup>H} NMR spectrum (125.71 MHz, 305.0 K, CD<sub>2</sub>Cl<sub>2</sub>) of 6[B(C<sub>6</sub>F<sub>5</sub>)<sub>4</sub>].

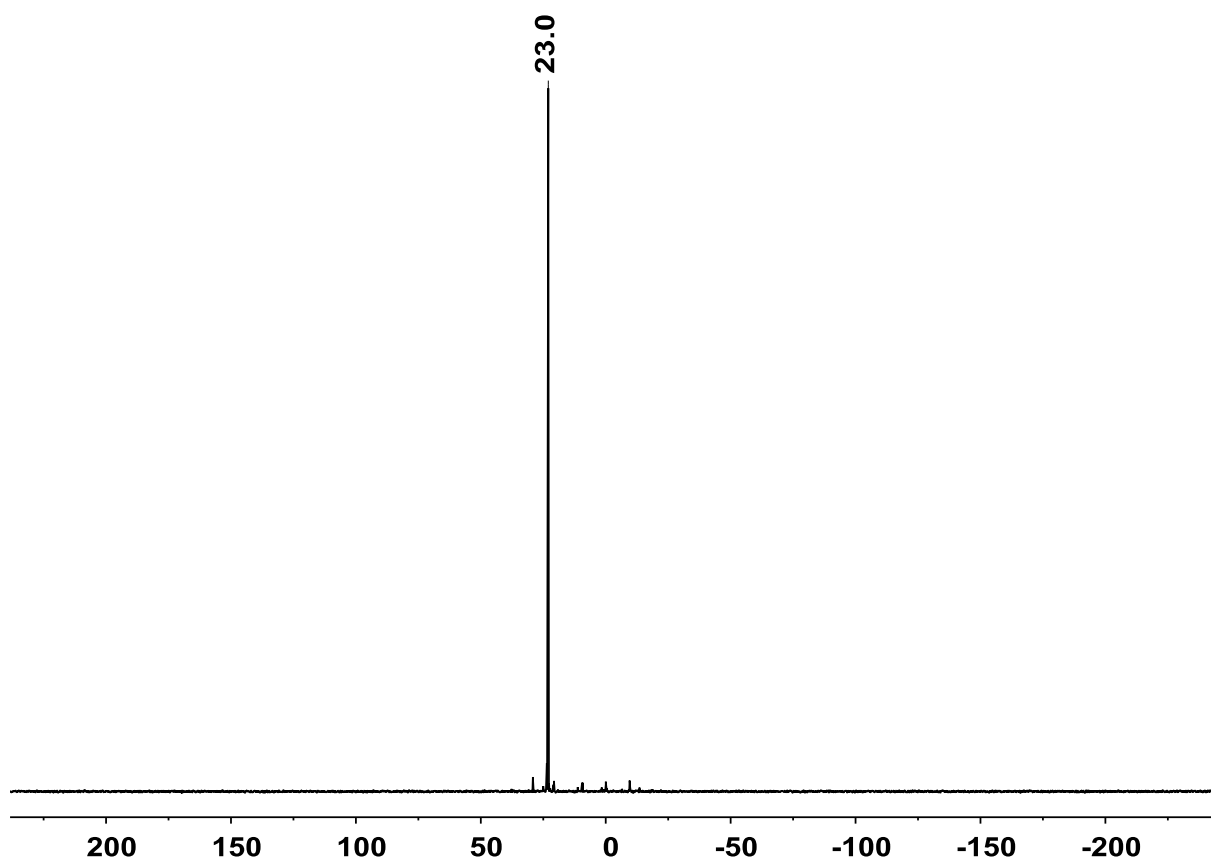

Figure S58 –  $^{29}\text{Si}\{^1\text{H}\}$  INEPT NMR spectrum (99.31 MHz, 305.0 K, D3 = 0.0084, D4 = 0.0313,  $\text{CD}_2\text{Cl}_2$ ) of  $6[\text{B}(\text{C}_6\text{F}_5)_4]$ .

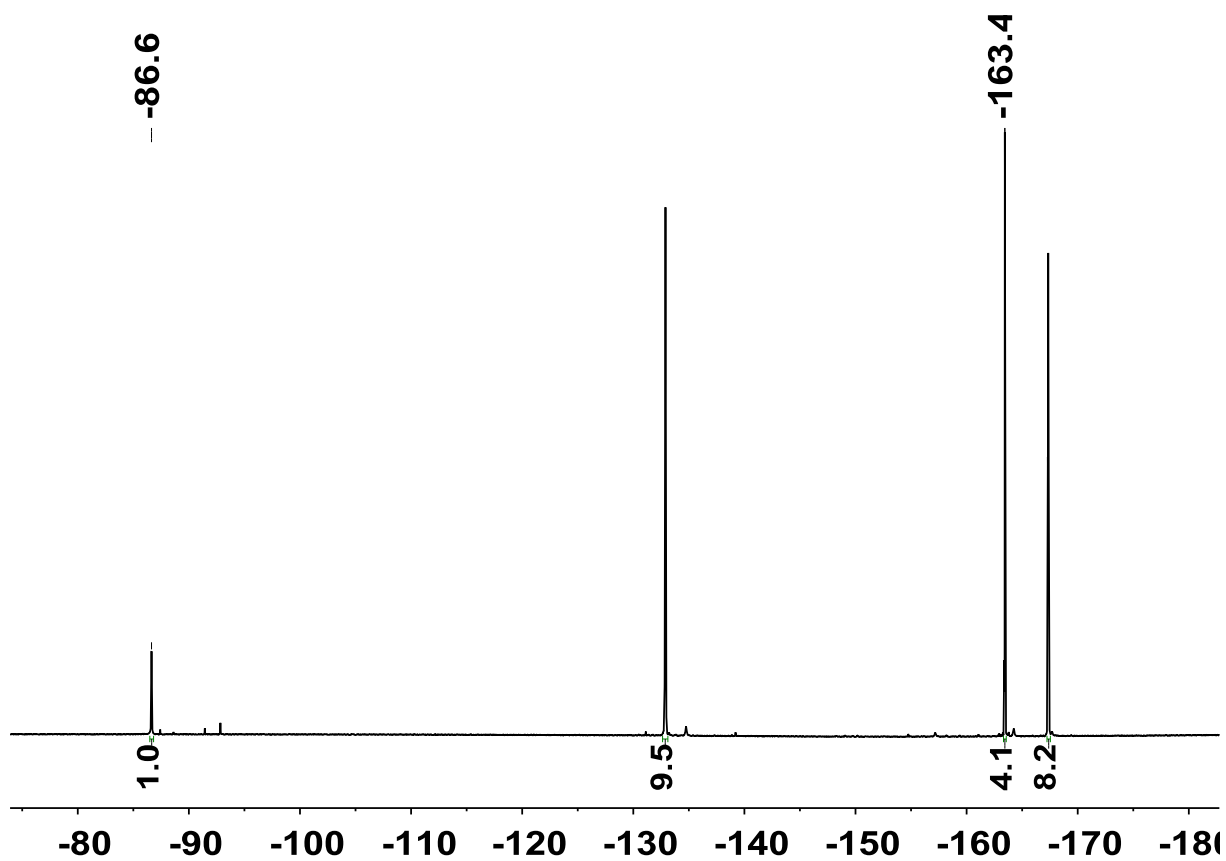

Figure S59 –  $^{19}\text{F}\{^1\text{H}\}$  NMR spectrum (470.30 MHz, 305.0 K,  $\text{CD}_2\text{Cl}_2$ ) of  $6[\text{B}(\text{C}_6\text{F}_5)_4]$ .

#### 4-Fluorobenzonitrile + silylium borate 1[B(C<sub>6</sub>F<sub>5</sub>)<sub>4</sub>]

4-Fluorobenzonitrile (1.0 equiv., 10.5 mg, 87 μmol) was added to a solution of silylium borate 1[B(C<sub>6</sub>F<sub>5</sub>)<sub>4</sub>] (1.0 equiv., 100 mg, 87 μmol) in chlorobenzene-d<sub>5</sub>, stirred for 15 min at room temperature and analyzed by NMR spectroscopy.

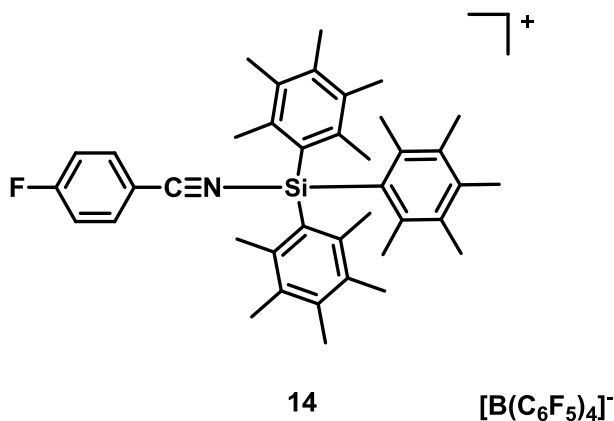

<sup>19</sup>F{<sup>1</sup>H} NMR (470.30 MHz, 305.0 K, C<sub>6</sub>D<sub>5</sub>Cl): δ = -167.4-(-167.3) (m, 8F, *m*-F, [B(C<sub>6</sub>F<sub>5</sub>)<sub>4</sub>]), -163.4 (t, <sup>3</sup>J<sub>F,F</sub> = 20.5 Hz, 4F, *p*-F, [B(C<sub>6</sub>F<sub>5</sub>)<sub>4</sub>]<sup>-</sup>), -132.9-(-132.8) (m, 8F, *o*-F, [B(C<sub>6</sub>F<sub>5</sub>)<sub>4</sub>]<sup>-</sup>), -87.3 (s, 1F, <sup>1</sup>J<sub>F,C</sub> = 269.7 Hz, CF, F-Ph). <sup>29</sup>Si{<sup>1</sup>H} NMR (99.31 MHz, 305.0 K, C<sub>6</sub>D<sub>5</sub>Cl): δ = -2.2.

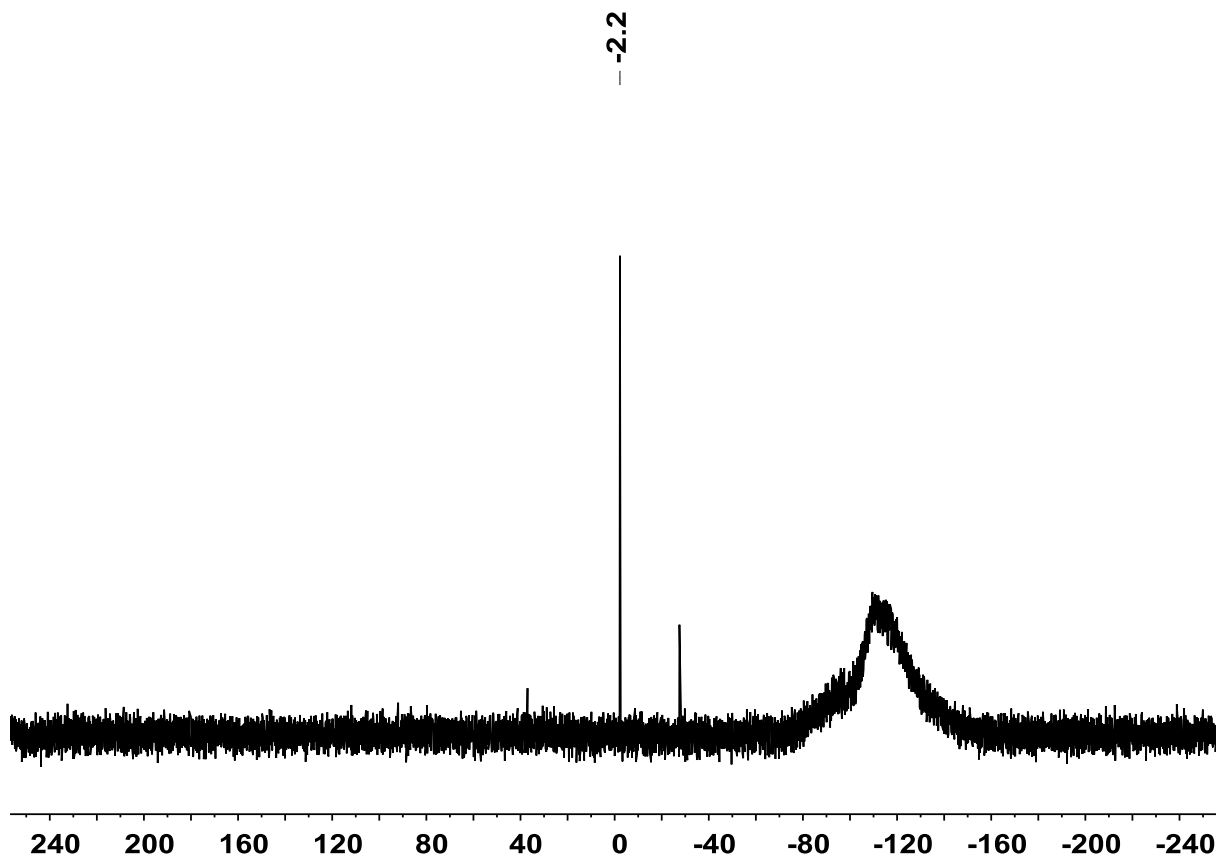

Figure S60 – <sup>29</sup>Si{<sup>1</sup>H} NMR spectrum (99.31 MHz, 305.0 K, C<sub>6</sub>D<sub>5</sub>Cl) of 14[B(C<sub>6</sub>F<sub>5</sub>)<sub>4</sub>].

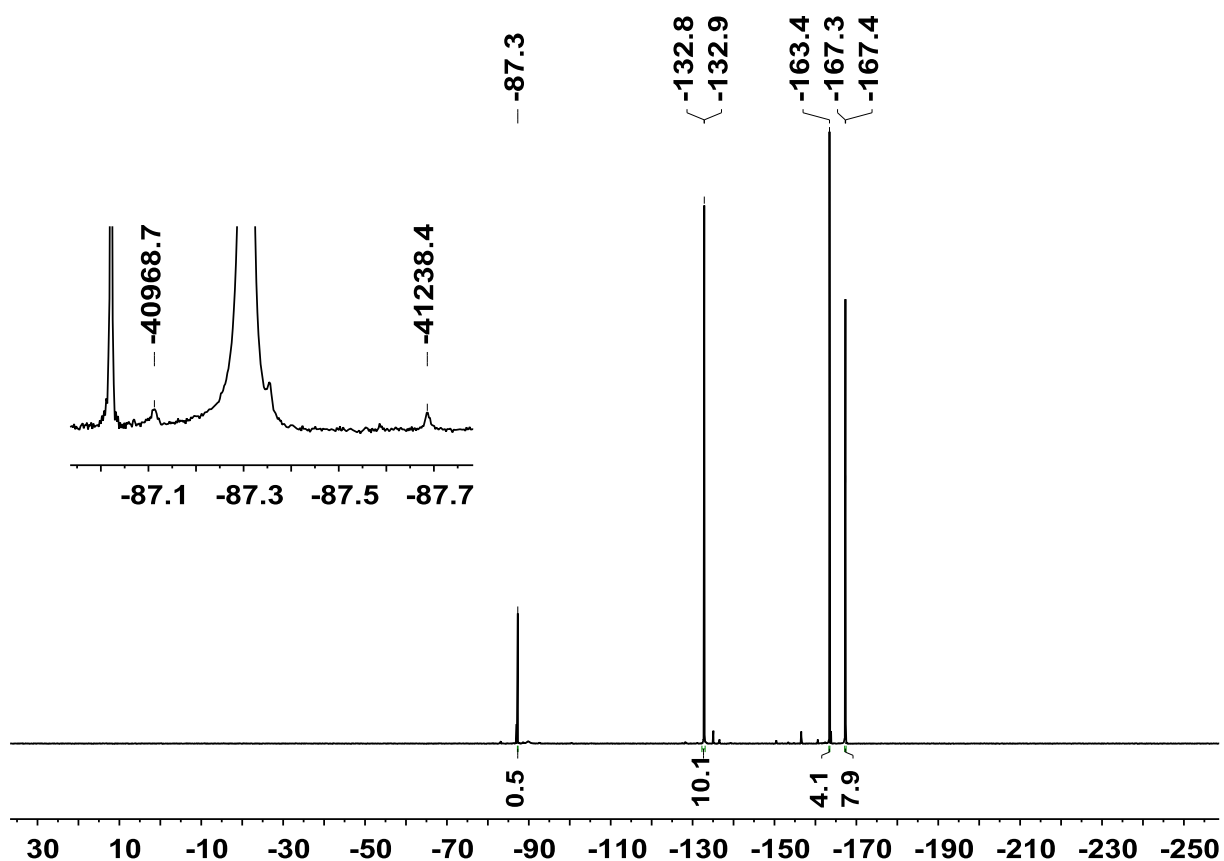

Figure S61 –  $^{19}\text{F}\{^1\text{H}\}$  NMR spectrum (470.30 MHz, 305.0 K,  $\text{C}_6\text{D}_5\text{Cl}$ ) of  $14[\text{B}(\text{C}_6\text{F}_5)_4]$ .

#### 4-Fluorobenzonitrile + $[\text{Et}_3\text{Si}(\text{C}_7\text{D}_8)][\text{B}(\text{C}_6\text{F}_5)_4]$

Triethylsilane (1.0 equiv., 0.07 mL, 421  $\mu\text{mol}$ ) was added at r.t. to a well stirred two-phase solution of trityl borate  $[\text{Ph}_3\text{C}][\text{B}(\text{C}_6\text{F}_5)_4]$  (1.0 equiv., 370 mg, 401  $\mu\text{mol}$ ) in toluene- $d_8$  and stirred for 15 min. After the biphasic reaction mixture was analyzed by NMR spectroscopy, the nonpolar phase was removed and 4-Fluorobenzonitrile (1.0 equiv., 48 mg, 401  $\mu\text{mol}$ ) was added. The reaction mixture was stirred for 15 min at room temperature. After removing the solvent under reduced pressure, the residue was dissolved in dichloromethane- $d_2$  and analyzed by NMR spectroscopy.

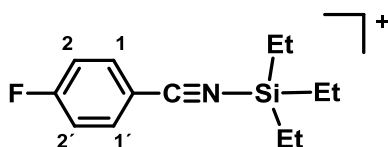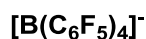

**$^1\text{H}$  NMR** (499.87 MHz, 305.0 K,  $\text{CD}_2\text{Cl}_2$ ):  $\delta = 1.14$ - $1.23$  (m, 12H,  $\text{Si}(\text{CH}_2\text{CH}_3)_3$ ), 7.43-7.46 (m, 2H, H-2, H-2'), 8.08-8.10 (m, 2H, H-1, H-1').  **$^{13}\text{C}\{^1\text{H}\}$  NMR** (125.71 MHz, 305.0 K,  $\text{CD}_2\text{Cl}_2$ ):  $\delta = 4.4$  (3 x  $\text{CH}_2$ ), 6.2 (3 x  $\text{CH}_3$ ), 99.0 (s,  $\underline{\text{C}}\text{-CN}$ ), 119.7 (d,  $^2J_{\text{C,F}} = 23.7$  Hz, CH, C-2, C-2'), 123.7-125.8 (brs, C,  $[\text{B}(\text{C}_6\text{F}_5)_4]^-$ ), 124.2 ( $\underline{\text{C}}\text{N}$ ), 137.0 (dm,  $^1J_{\text{C,F}} = 243.0$  Hz, CF,  $[\text{B}(\text{C}_6\text{F}_5)_4]^-$ ), 138.9 (dm,  $^1J_{\text{C,F}} = 243.5$  Hz, CF,  $[\text{B}(\text{C}_6\text{F}_5)_4]^-$ ), 139.2 (d,  $^3J_{\text{C,F}} = 11.0$  Hz, CH, C-1, C-1'), 148.9 (dm,  $^1J_{\text{C,F}} = 241.5$  Hz, CF,  $[\text{B}(\text{C}_6\text{F}_5)_4]^-$ ), 169.9 (d,  $^1J_{\text{C,F}} = 269.9$  Hz, CF, F-Ph).  **$^{19}\text{F}\{^1\text{H}\}$  NMR** (470.29 MHz, 305.1 K,  $\text{CD}_2\text{Cl}_2$ ):  $\delta = -167.8$ -(-167.4) (m, 8F, *m*-F,  $[\text{B}(\text{C}_6\text{F}_5)_4]^-$ ), -163.4 (t,  $^3J_{\text{F,F}} = 20.3$  Hz, 4F, *p*-F,  $[\text{B}(\text{C}_6\text{F}_5)_4]^-$ ), -133.2-(-132.8) (m, 8F, *o*-F,  $[\text{B}(\text{C}_6\text{F}_5)_4]^-$ ), -87.9 (brs, 1F, CF, F-Ph).  **$^{29}\text{Si}\{^1\text{H}\}$  NMR** (99.31 MHz, 305.0 K,  $\text{CD}_2\text{Cl}_2$ ):  $\delta = 41.2$ .  **$^{11}\text{B}\{^1\text{H}\}$  NMR** (160.38 MHz, 305.0 K,  $\text{CD}_2\text{Cl}_2$ ):  $\delta = -16.6$ .

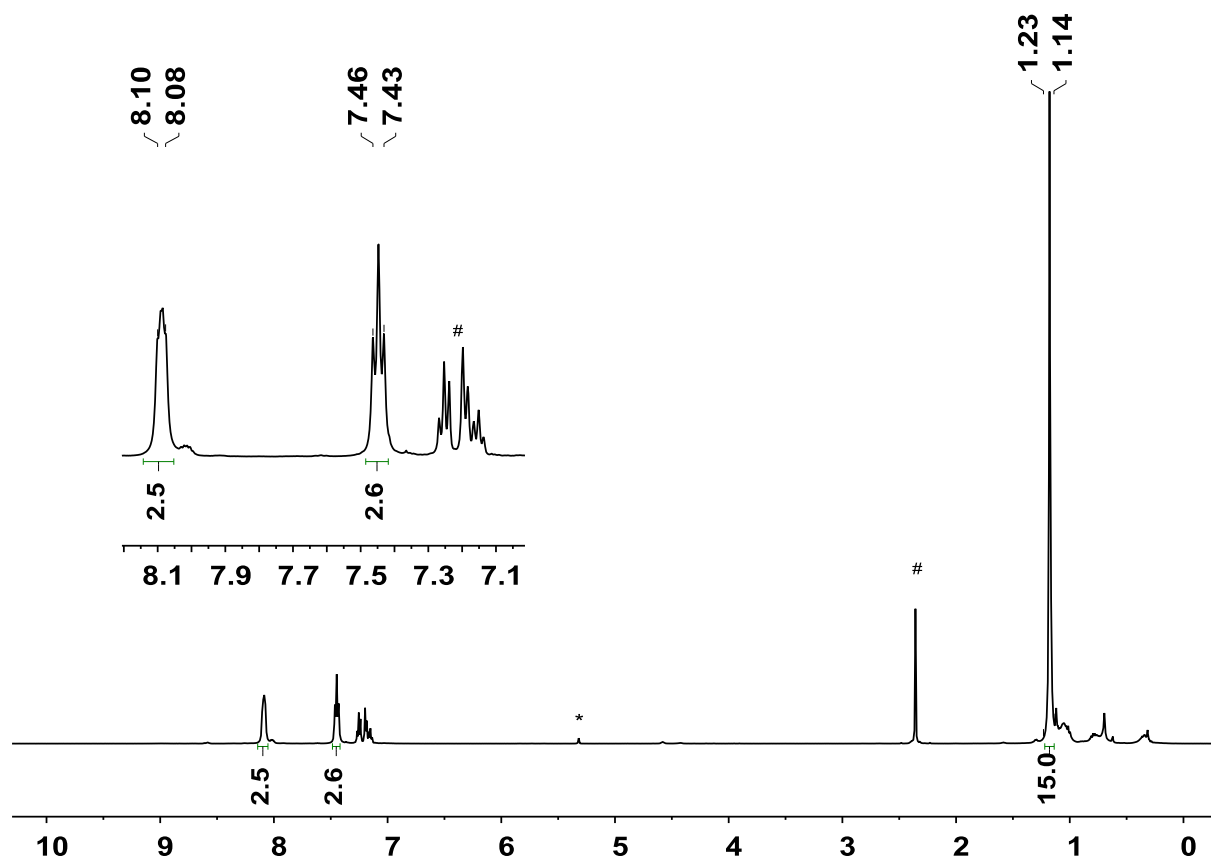

Figure S62 –  $^1\text{H}$  NMR (499.87 MHz, 305.0 K,  $^*\text{CD}_2\text{Cl}_2$ ,  $\# \text{C}_7\text{D}_8$ ) of  $[\text{Et}_3\text{Si}(\text{FBN})][\text{B}(\text{C}_6\text{F}_5)_4]$ .

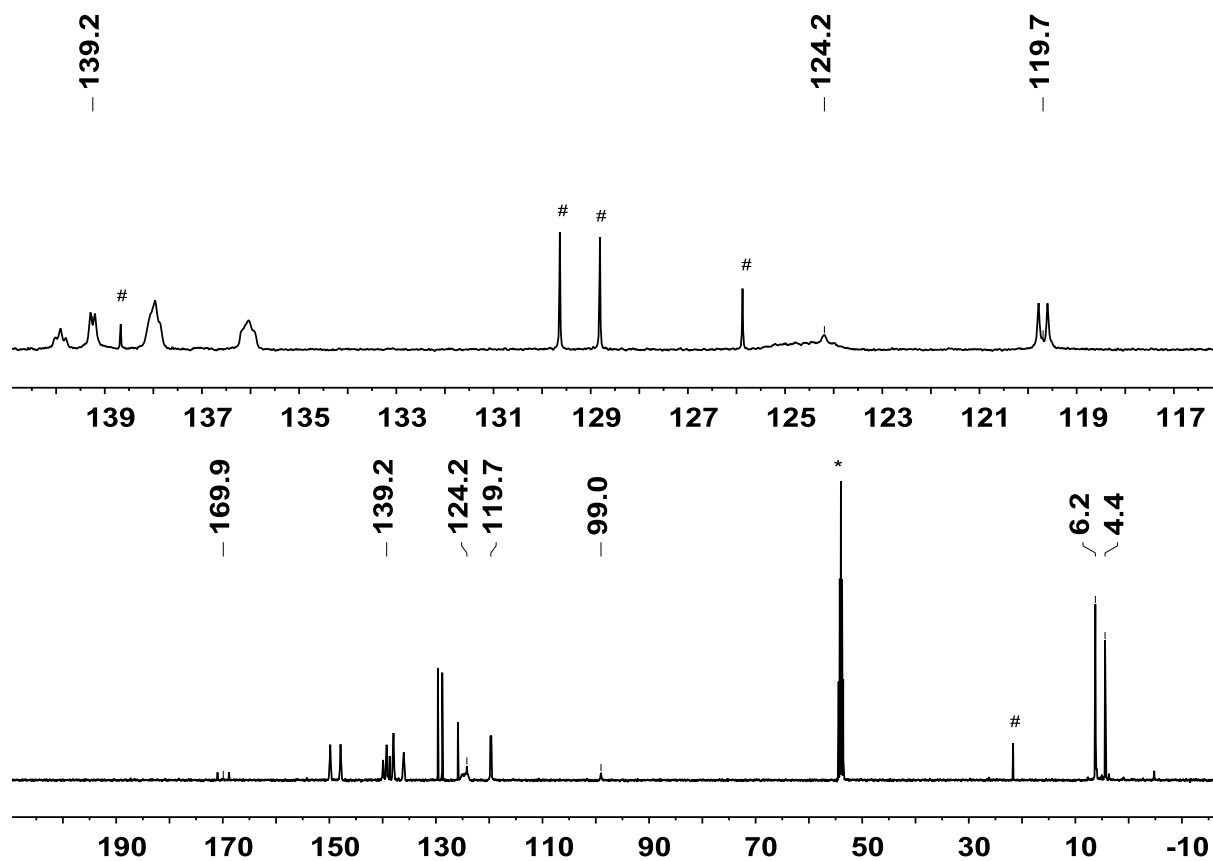

Figure S63 –  $^{13}\text{C}\{^1\text{H}\}$  NMR spectrum (125.71 MHz, 305.0 K,  $^*\text{CD}_2\text{Cl}_2$ ,  $^#\text{C}_6\text{H}_6$ ) of  $[\text{Et}_3\text{Si}(\text{FBN})][\text{B}(\text{C}_6\text{F}_5)_4]$ .

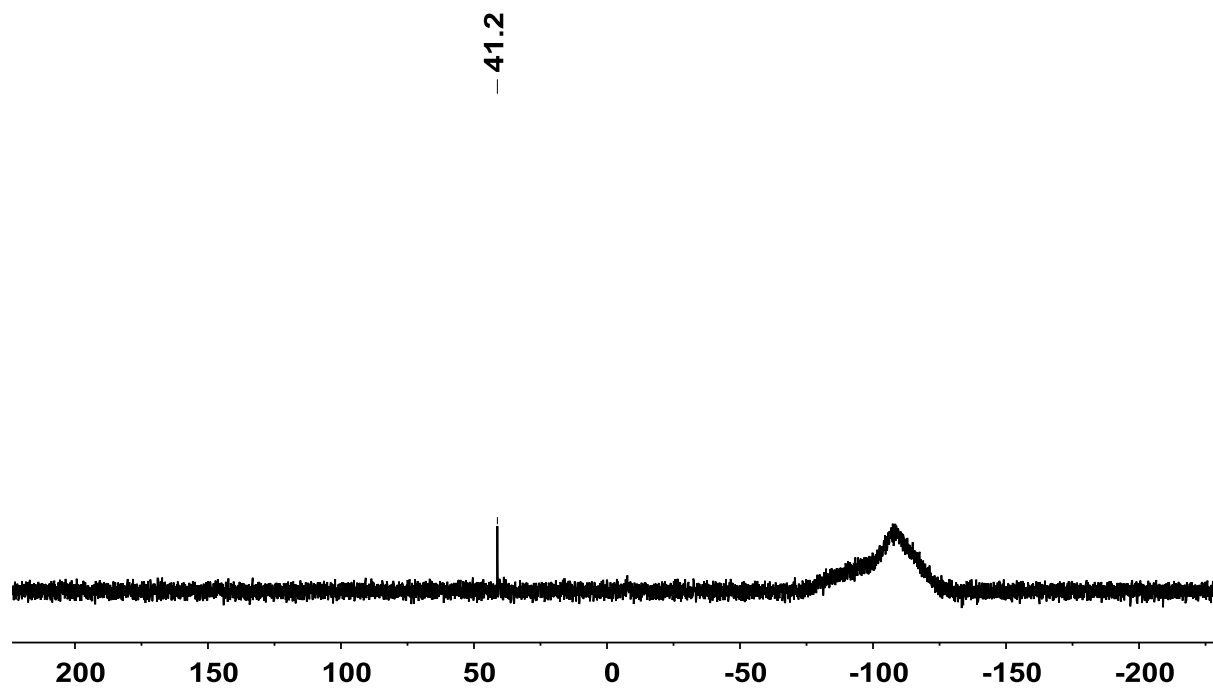

Figure S64 –  $^{29}\text{Si}\{^1\text{H}\}$  NMR spectrum (99.31 MHz, 305.0 K,  $\text{CD}_2\text{Cl}_2$ ) of  $[\text{Et}_3\text{Si}(\text{FBN})][\text{B}(\text{C}_6\text{F}_5)_4]$ .

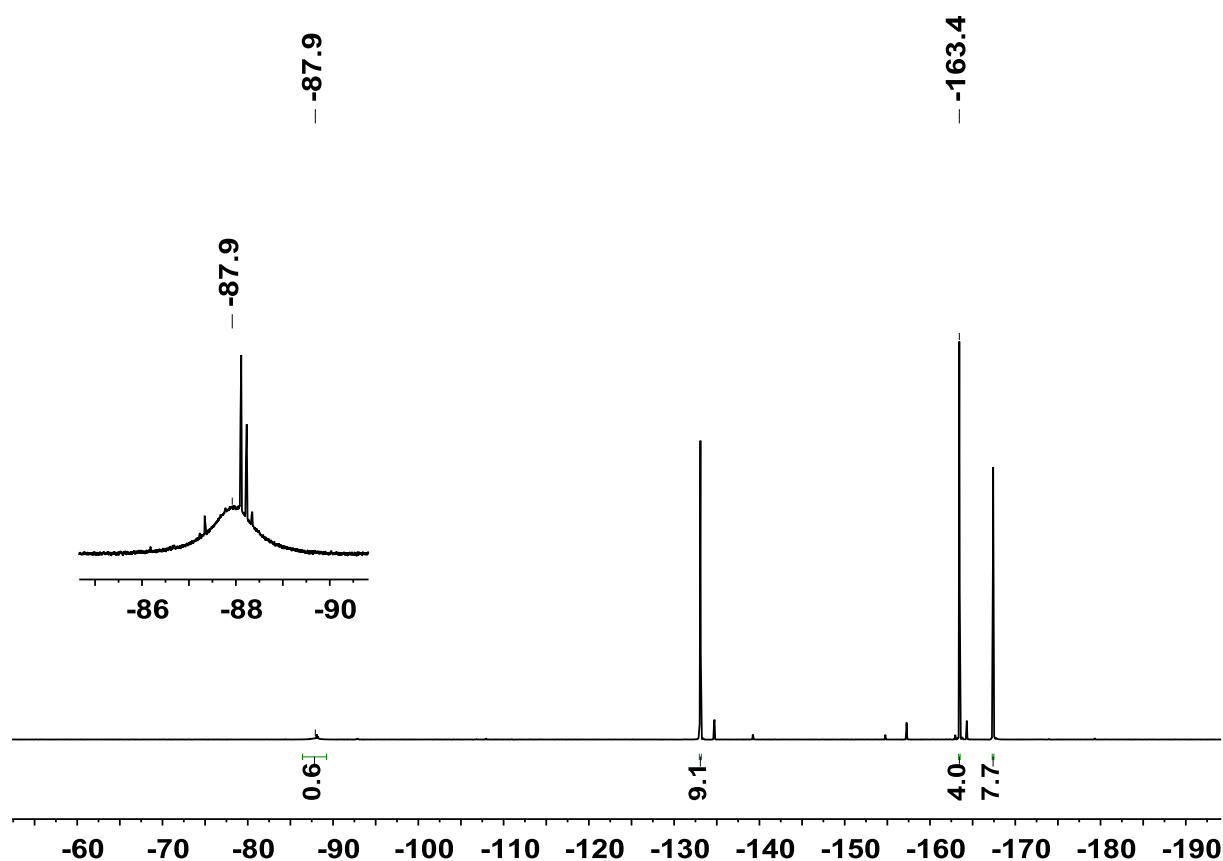

Figure S65 –  $^{19}\text{F}\{^1\text{H}\}$  NMR spectrum (470.29 MHz, 305.1 K,  $\text{CD}_2\text{Cl}_2$ ) of  $[\text{Et}_3\text{Si}(\text{FBN})][\text{B}(\text{C}_6\text{F}_5)_4]$ .

#### 1.4. 4-Fluorobenzonitrile + Tritylborate in $\text{CD}_2\text{Cl}_2$

The NMR sample was prepared using trityl borate (250.00  $\mu\text{mol}$ , 230 mg) and 4-fluorobenzonitrile (250.00  $\mu\text{mol}$ , 30  $\mu\text{L}$ ) in 0.7 mL dichloromethane- $d_2$ .

$^1\text{H}$  NMR (499.87 MHz, 305.0 K,  $\text{CD}_2\text{Cl}_2$ ):  $\delta$  = 7.19-7.25 (m, 2 H, CN-Ar, *m*-CH), 7.69-7.72 (m, 8 H,  $[\text{CPh}_3]^+$ , *o*-CH, CN-Ar, *o*-CH), 7.89 (t,  $^3J_{\text{H,H}} = 7.8$  Hz, 6 H,  $[\text{CPh}_3]^+$ , *m*-CH), 8.28 (t,  $^3J_{\text{H,H}} = 7.5$  Hz, 3 H,  $[\text{CPh}_3]^+$ , *p*-CH).  $^{13}\text{C}\{^1\text{H}\}$  NMR (125.71 MHz, 305.0 K,  $\text{CD}_2\text{Cl}_2$ ):  $\delta$  = 109.3 ( $\underline{\text{C}}$ -CN), 117.4 (d,  $^2J_{\text{C,F}} = 22.8$  Hz, CN-Ar, *m*-CH), 118.7 (CN), 123.7-125.7 (brs, C,  $[\text{B}(\text{C}_6\text{F}_5)_4]^-$ ), 131.2 ( $[\text{CPh}_3]^+$ , *m*-CH), 135.3 (d,  $^3J_{\text{C,F}} = 9.4$  Hz, CN-Ar, *o*-CH), 136.9 (dm,  $^1J_{\text{C,F}} = 243.4$  Hz, CF,  $[\text{B}(\text{C}_6\text{F}_5)_4]^-$ ), 138.9 (dm,  $^1J_{\text{C,F}} = 244.0$  Hz, CF,  $[\text{B}(\text{C}_6\text{F}_5)_4]^-$ ), 140.6 ( $[\text{CPh}_3]^+$ , *ipso*-C), 143.2 ( $[\text{CPh}_3]^+$ , *o*-CH), 144.1 ( $[\text{CPh}_3]^+$ , *p*-CH), 148.8 (d,  $^1J_{\text{C,F}} = 239.7$  Hz, CF,  $[\text{B}(\text{C}_6\text{F}_5)_4]^-$ ), 165.7 (d,  $^1J_{\text{C,F}} = 255.7$  Hz, CF), 211.6 ( $[\underline{\text{C}}\text{Ph}_3]^+$ ).  $^{19}\text{F}\{^1\text{H}\}$  NMR (470.28 MHz, 305.0 K,  $\text{CD}_2\text{Cl}_2$ ):  $\delta$  = -167.4-(-167.2) (m, 8 F, *m*-F,  $[\text{B}(\text{C}_6\text{F}_5)_4]^-$ ), -163.44 (t,  $^3J_{\text{F,F}} = 20.4$  Hz, 4 F, *o*-F,  $[\text{B}(\text{C}_6\text{F}_5)_4]^-$ ), -132.9-(-132.7) (m, 8 F, *o*-F,  $[\text{B}(\text{C}_6\text{F}_5)_4]^-$ ), -103.4 (s, 1 F, CF).  $^{11}\text{B}\{^1\text{H}\}$  NMR (160.38 MHz, 305.1 K,  $\text{CD}_2\text{Cl}_2$ ):  $\delta$  = -16.6.

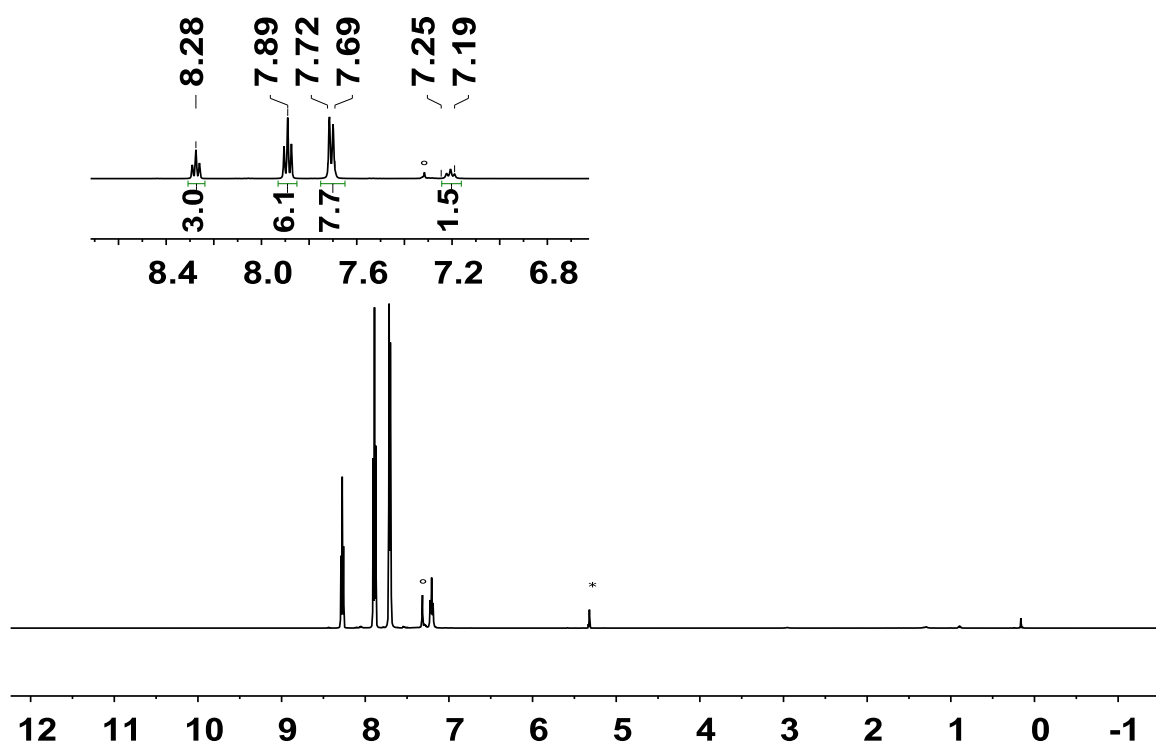

Figure S66 –  $^1\text{H}$  NMR spectrum (499.87 MHz, 305.0 K,  $\text{CD}_2\text{Cl}_2$ , \*  $\text{CDHCl}_2$ , ° impurities) of 4-Fluorobenzonitrile + Tritylborate.

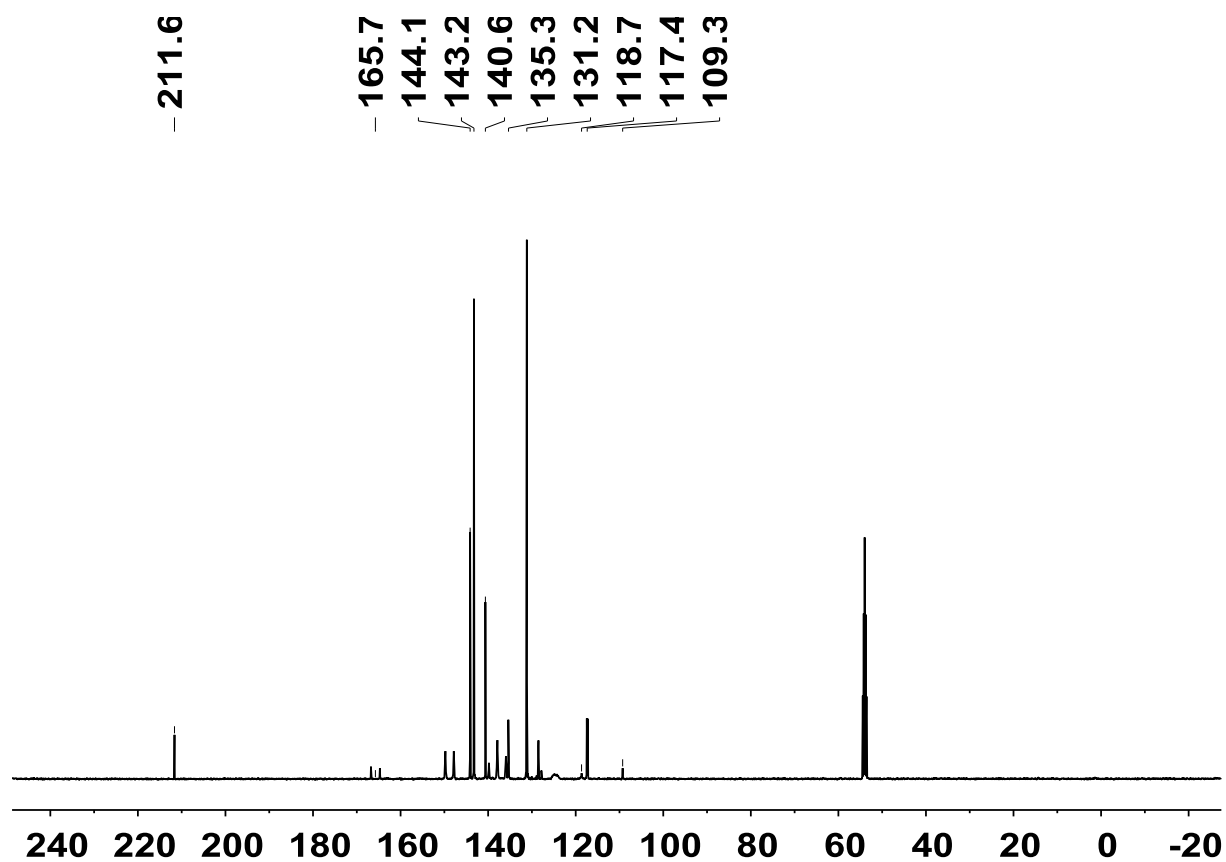

Figure S67 –  $^{13}\text{C}\{^1\text{H}\}$  NMR spectrum (125.71 MHz, 305.0 K,  $\text{CD}_2\text{Cl}_2$ ) of 4-Fluorobenzonitrile + Tritylborate.



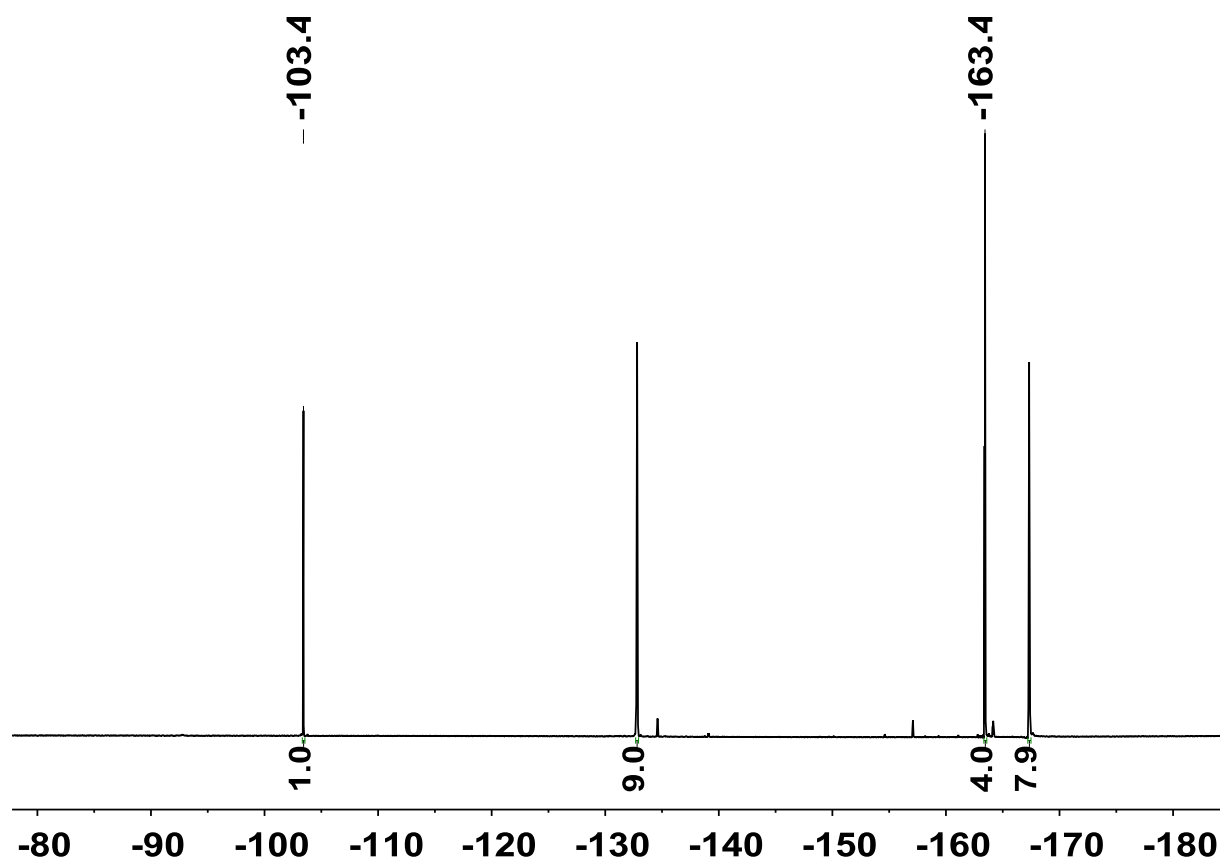

Figure S68 –  $^{19}\text{F}\{^1\text{H}\}$  NMR spectrum (470.30 MHz, 305.0 K,  $\text{CD}_2\text{Cl}_2$ ) of 4-Fluorobenzonitrile + Tritylborate.

### 1.5. Tris(pentafluorophenyl)borane 4-fluorobenzonitrile adduct 4

A Schlenk tube was charged with 94 mg (183.60  $\mu\text{mol}$ ) tris(pentafluorophenyl)borane, 22 mg (183.60  $\mu\text{mol}$ ) 4-fluorobenzonitrile and 52 mg (56.38  $\mu\text{mol}$ ) trityl borate. The solids were dissolved in 0.7 mL  $\text{CD}_2\text{Cl}_2$  and the mixture was stirred for 20 min at r.t.. Then the mixture was transferred to a NMR tube for analysis. Trityl borate was added as internal reference for the  $^{19}\text{F}$  NMR spectroscopy.

$^1\text{H}$  NMR (499.87 MHz, 305.0 K,  $\text{CD}_2\text{Cl}_2$ ):  $\delta$  = 7.35-7.43 (brm, 2 H, CN-Ar, *m*-CH), 7.69 (d,  $^3J_{\text{H,H}} = 7.5$  Hz,  $[\text{CPh}_3]^+$ , *o*-CH), 7.89 (t,  $^3J_{\text{H,H}} = 7.8$  Hz,  $[\text{CPh}_3]^+$ , *m*-CH), 7.94-7.05 (brm, 2 H, CN-Ar, *o*-CH), 8.28 (t,  $^3J_{\text{H,H}} = 7.5$  Hz,  $[\text{CPh}_3]^+$ , *p*-CH).  $^{13}\text{C}\{^1\text{H}\}$  NMR (125.71 MHz, 305.0 K,  $\text{CD}_2\text{Cl}_2$ ):  $\delta$  = 102.0 (NC-Ar), 114.5 (NC-Ar), 115.7 (NC-Ar), 119.0 (d,  $^2J_{\text{C,F}} = 13.5$  Hz, NC-Ar), 123.4-125.5 (brs, C,  $[\text{B}(\text{C}_6\text{F}_5)_4]^-$ ), 131.2 ( $[\text{CPh}_3]^+$ , CH), 136.8 (dm,  $^1J_{\text{C,F}} = 241.4$  Hz, CF,  $[\text{B}(\text{C}_6\text{F}_5)_4]^-$ ), 138.0 (dm,  $^1J_{\text{C,F}} = 249.0$  Hz,  $\text{C}_6\text{F}_5$ , *m*-CF), 138.8 (dm,  $^1J_{\text{C,F}} = 247.6$  Hz, CF,  $[\text{B}(\text{C}_6\text{F}_5)_4]^-$ ), 140.6 ( $[\text{CPh}_3]^+$ , CH), 141.1 (dm,  $^1J_{\text{C,F}} = 251.0$  Hz,  $\text{C}_6\text{F}_5$ , *p*-CF), 143.3 ( $[\text{CPh}_3]^+$ , CH), 144.2 ( $[\text{CPh}_3]^+$ , CH), 148.8 (d,

$^1J_{C,F} = 240.8$  Hz, CF,  $[B(C_6F_5)_4]^-$ ,  $C_6F_5$ , *o*-CF), 168.7 (d,  $^1J_{C,F} = 269.9$  Hz, NC-Ar, CF), 211.5 ( $[CPh_3]^+$ ).  $^{11}B\{^1H\}$  NMR (160.38 MHz, 305.0 K,  $CD_2Cl_2$ ):  $\delta = -10.0$  (N-B),  $-16.6$  ( $[B(C_6F_5)_4]^-$ ).  $^{19}F\{^1H\}$  NMR (470.28 MHz, 193.0 K,  $CD_2Cl_2$ ):  $\delta = -167.4$ - $(-167.2)$  (m, *m*-F,  $[B(C_6F_5)_4]^-$ ),  $-164.0$ - $(-163.9)$  (m, 6 F, *m*- $C_6F_5$ ),  $-163.44$  (t,  $^3J_{F,F} = 20.3$  Hz, *o*-F,  $[B(C_6F_5)_4]^-$ ),  $-156.8$  (t,  $^3J_{F,F} = 20.2$  Hz, 3 F, *p*- $C_6F_5$ ),  $-134.5$ - $(-134.3)$  (m, 6 H, *o*- $C_6F_5$ ),  $-132.9$ - $(-132.5)$  (m, *o*-F,  $[B(C_6F_5)_4]^-$ ),  $-92.5$  (s, 1 F, CF).

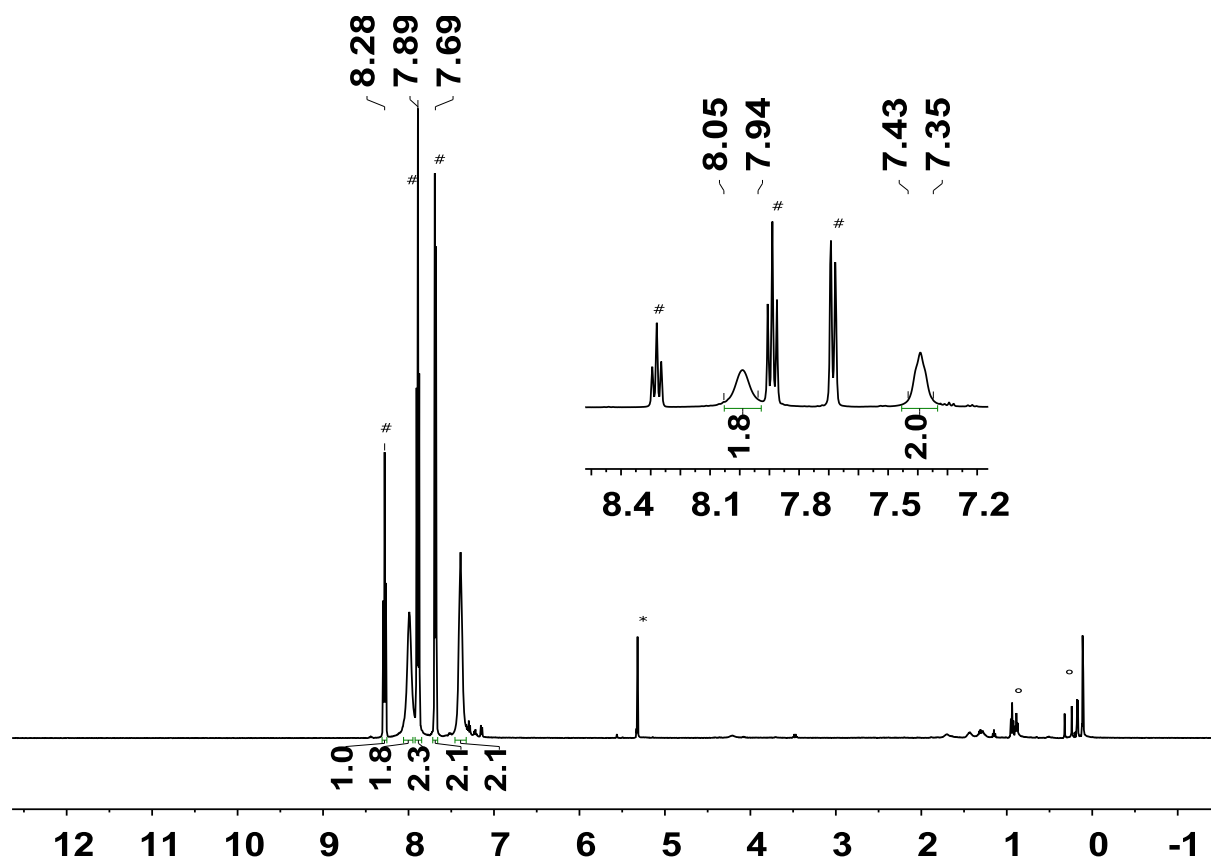

Figure S69 –  $^1H$  NMR spectrum (499.87 MHz, 305.0 K,  $CD_2Cl_2$ , \*  $CDHCl_2$ , # trityl borate, ° impurities) of  $4[B(C_6F_5)_4]$ .

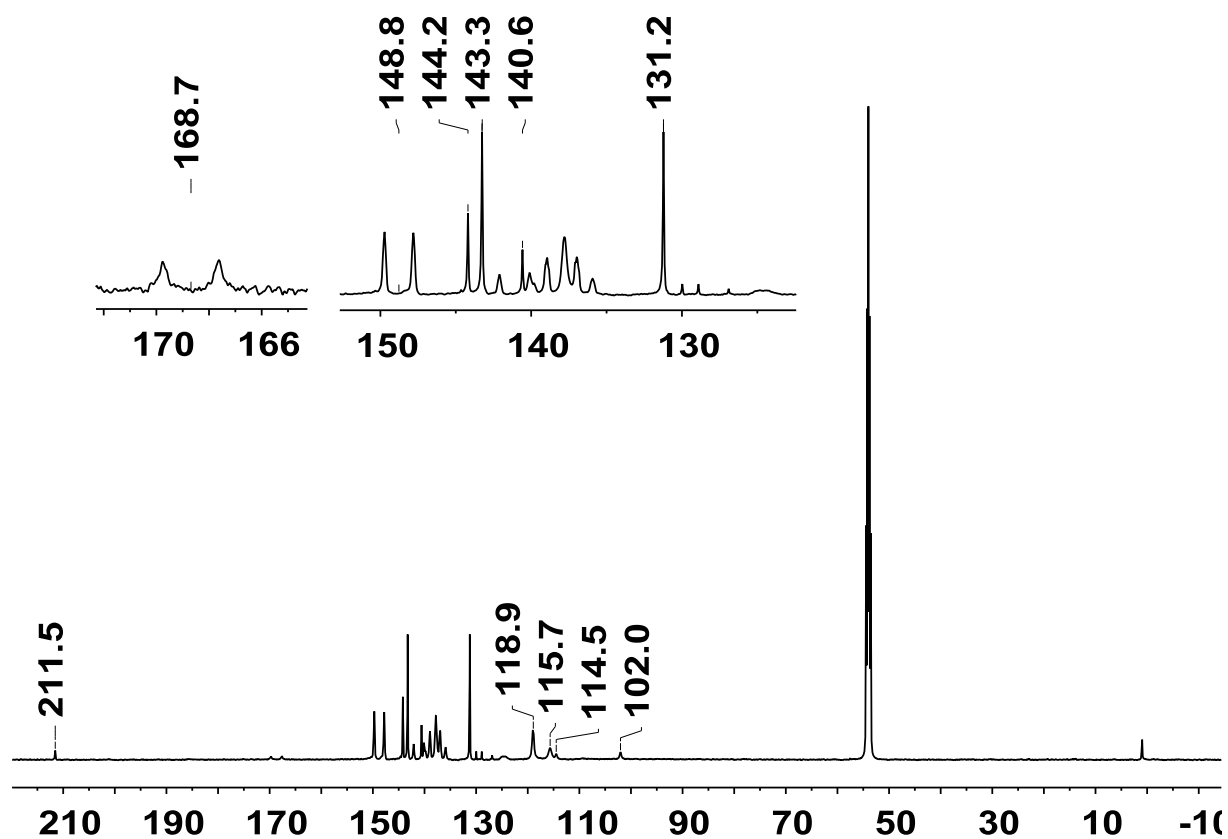

Figure S70 –  $^{13}\text{C}\{^1\text{H}\}$  NMR spectrum (125.85 MHz, 300.0 K,  $\text{CD}_2\text{Cl}_2$ ) of  $4[\text{B}(\text{C}_6\text{F}_5)_4]$ .

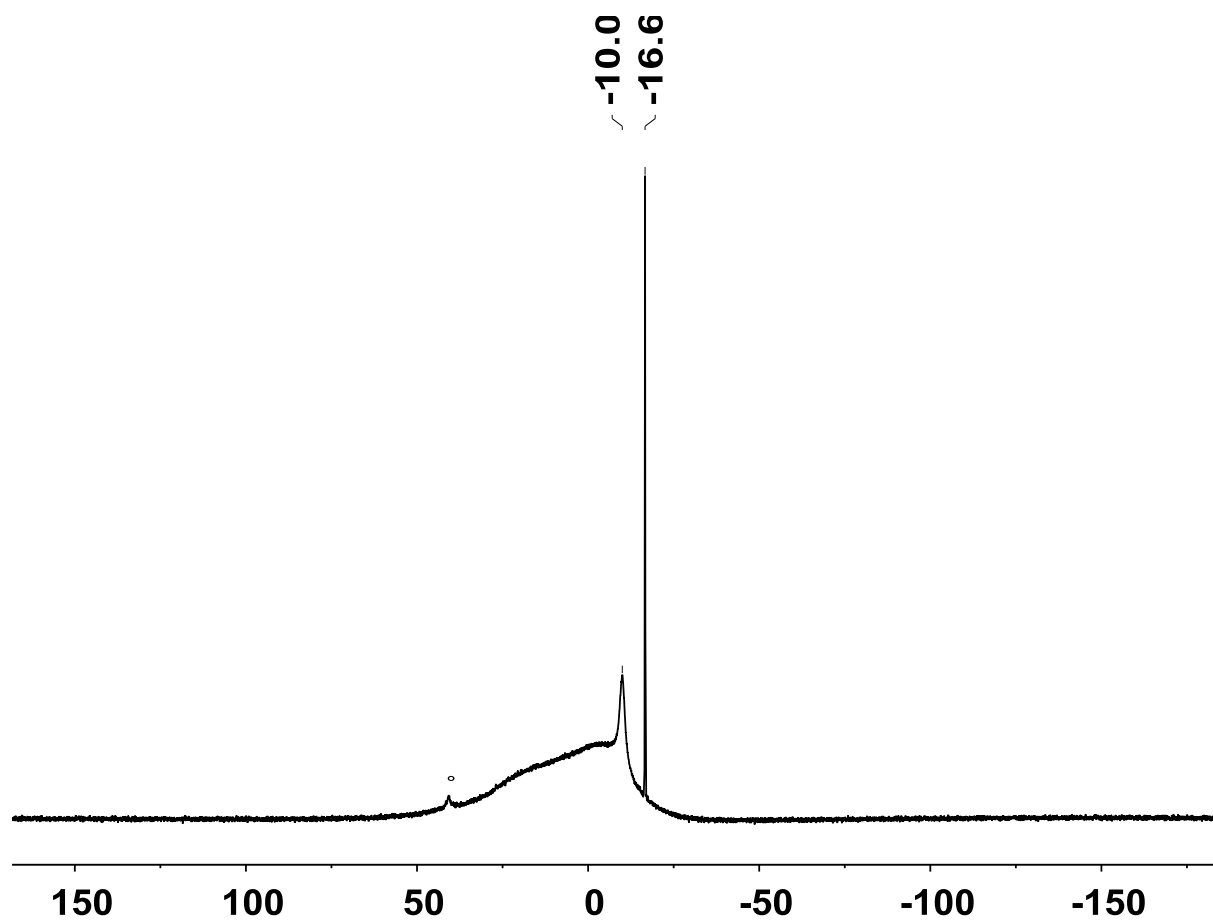

Figure S71 –  $^{11}\text{B}\{^1\text{H}\}$  NMR spectrum (160.38 MHz, 305.0 K,  $\text{CD}_2\text{Cl}_2$ , ° impurity) of  $4[\text{B}(\text{C}_6\text{F}_5)_4]$ .

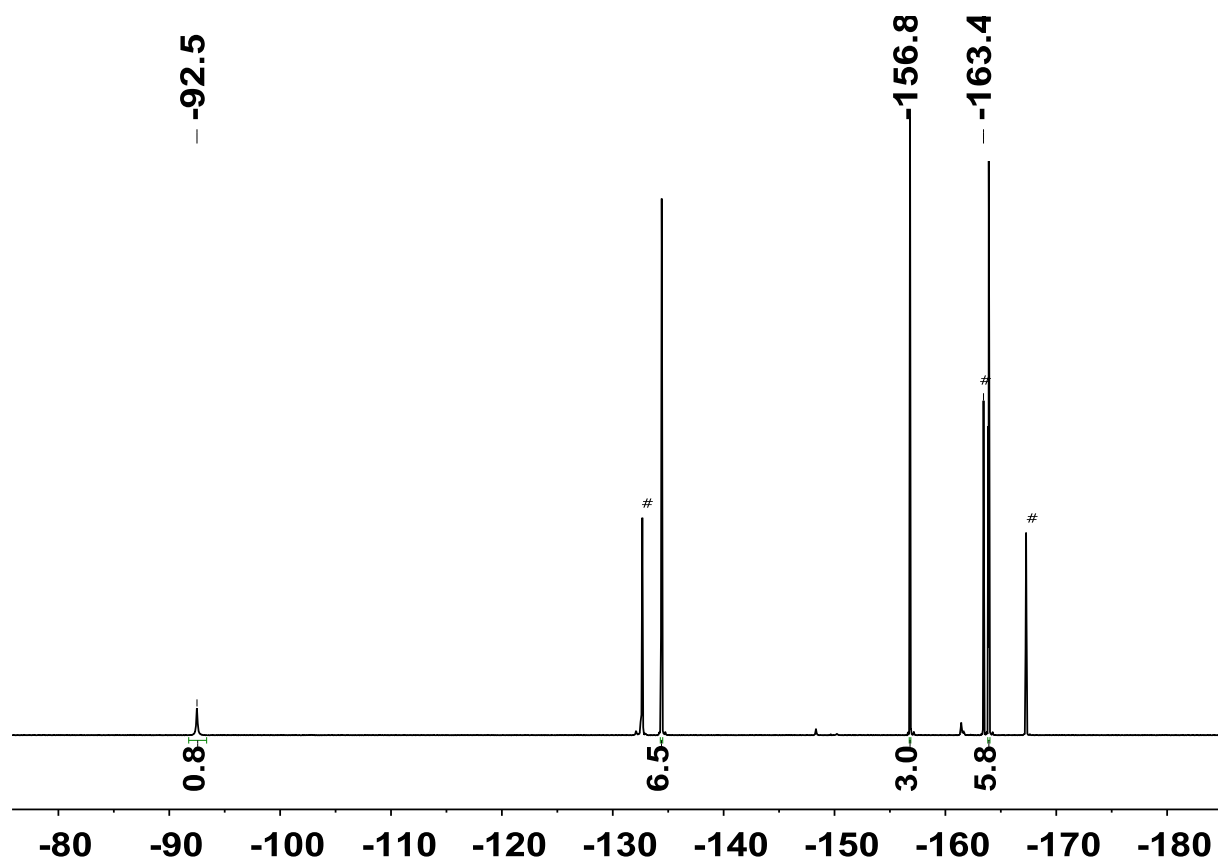

Figure S72 –  $^{19}\text{F}\{^1\text{H}\}$  NMR spectrum (470:29 MHz, 305.0 K, D1 = 10 s  $\text{CD}_2\text{Cl}_2$ , # trityl borate) of  $4[\text{B}(\text{C}_6\text{F}_5)_4]$ .

### 1.6. Gutmann-Beckett method for silyl cation **2c**

A Schlenk tube was charged with 155 mg (0.421 mmol) selenyl silane **7c**. In another Schlenk tube 380 mg (0.401 mmol) trityl borate  $[\text{Ph}_3\text{C}][\text{B}(\text{C}_6\text{F}_5)_4]$  was dissolved in deuterated benzene. This solution was added to the silane and stirred for 30 min. The biphasic reaction mixture was transferred into an NMR tube and analyzed by NMR spectroscopy. The solution of **2c** was then added to a Schlenk tube, charged with 54 mg (0.401 mmol) triethylphosphane oxide. After stirring for one hour, the mixture was transferred into an NMR tube for analysis.

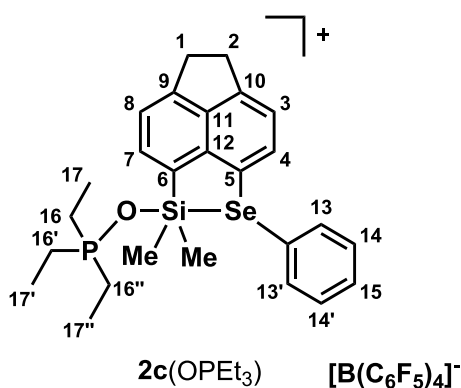

**<sup>29</sup>Si{<sup>1</sup>H} NMR** (99.31 MHz, 305.0 K, C<sub>6</sub>D<sub>6</sub>):  $\delta = 9.4$  ( $^1J_{\text{Si,P}} = 15.2$  Hz). **<sup>33</sup>P{<sup>1</sup>H} NMR** (202.35 MHz, 305.1 K, C<sub>6</sub>D<sub>6</sub>):  $\delta = 86.0$ . **<sup>77</sup>Se{<sup>1</sup>H} NMR** (95.36 MHz, 305.0 K, C<sub>6</sub>D<sub>6</sub>):  $\delta = 348.0$ .

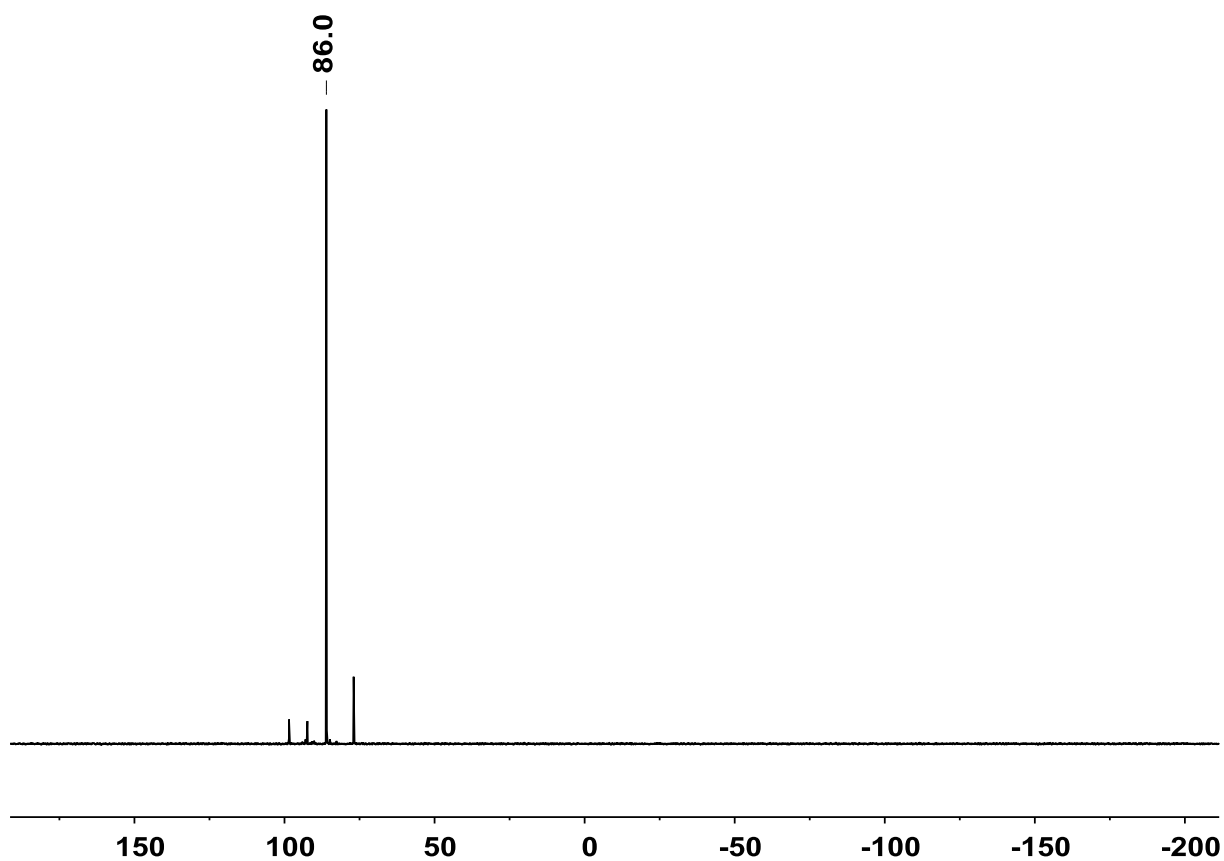

Figure S73 –  $^{31}\text{P}\{^1\text{H}\}$  NMR spectrum (202.35 MHz, 305.1 K,  $\text{C}_6\text{D}_6$ ) of  $2\text{c}(\text{OPEt}_3)[\text{B}(\text{C}_6\text{F}_5)_4]$ .

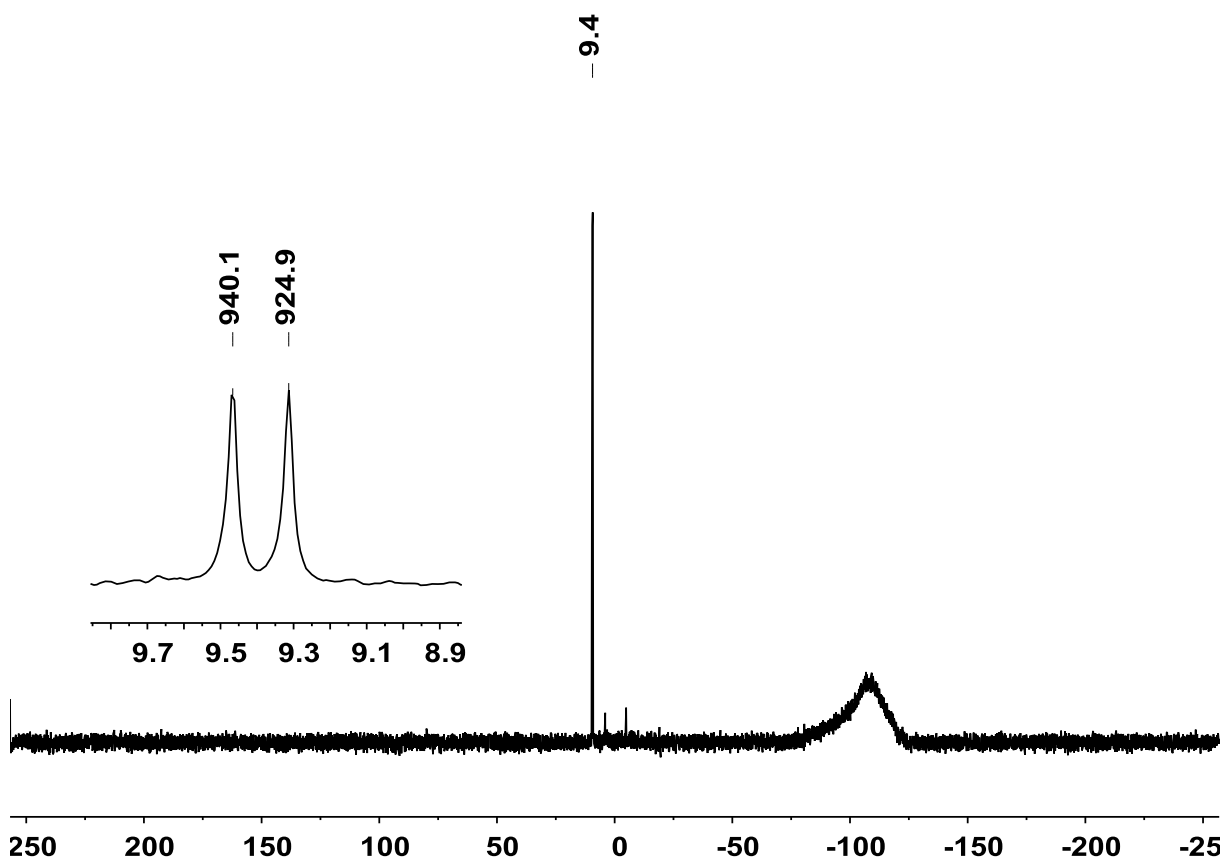

Figure S74 –  $^{29}\text{Si}\{^1\text{H}\}$  NMR spectrum (99.31 MHz, 305.0 K,  $\text{C}_6\text{D}_6$ ) of  $2\text{c}(\text{OPEt}_3)[\text{B}(\text{C}_6\text{F}_5)_4]$ .

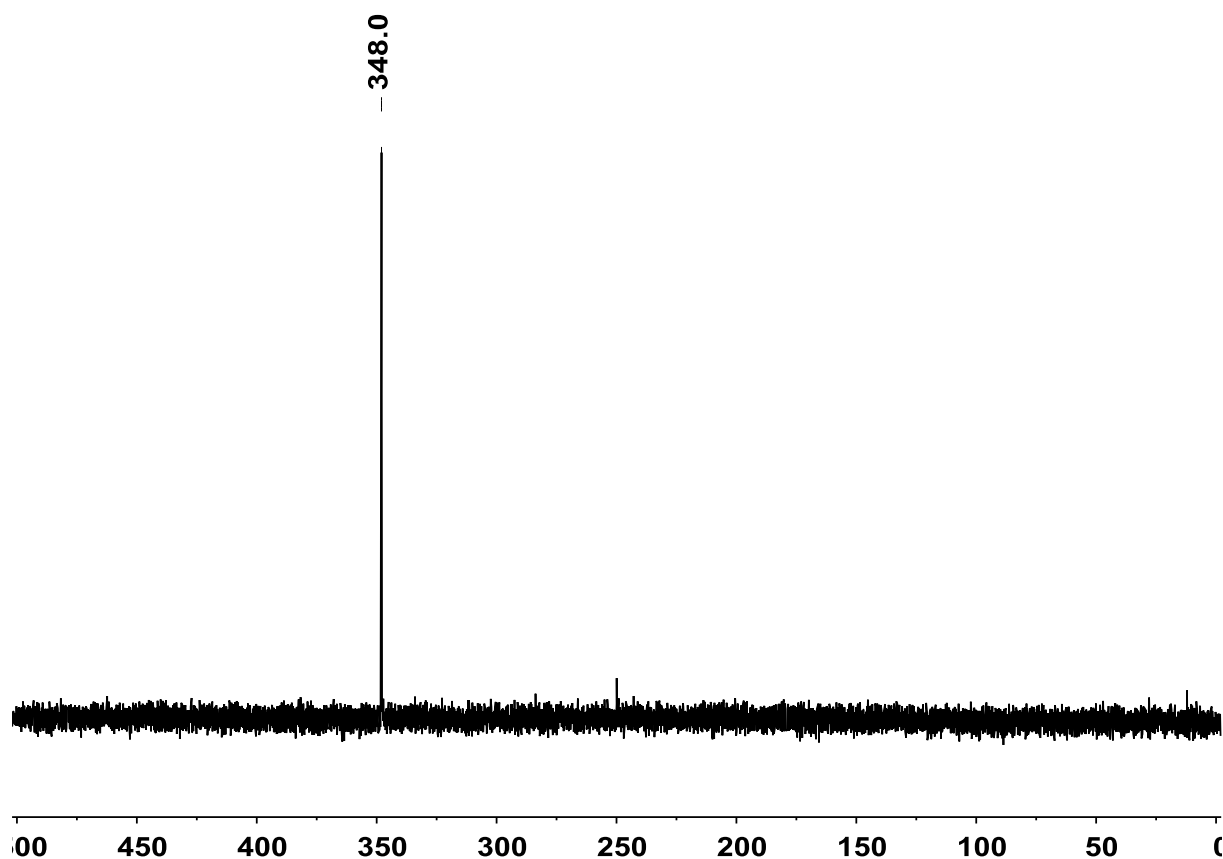

Figure S75 –  $^{77}\text{Se}\{^1\text{H}\}$  NMR spectrum (95.36 MHz, 305.0 K,  $\text{C}_6\text{D}_6$ ) of  $2\text{c}(\text{OPEt}_3)[\text{B}(\text{C}_6\text{F}_5)_4]$ .

### 1.7. Variable temperature NMR measurements of nitrilium ion **10c** with an excess 4-fluorobenzonitrile

To the NMR solution of **10c** $[\text{B}(\text{C}_6\text{F}_5)_4]$  (stoichiometric) was added another equivalent 4-fluorobenzonitrile (49 mg, 400  $\mu\text{mol}$ ). The resulting solution was then analyzed by NMR spectroscopy at various temperatures. The signal of the *p*-fluorine atoms of  $[\text{B}(\text{C}_6\text{F}_5)_4]^-$  was referenced against the corresponding values in Table S1. At high temperatures the  $^{19}\text{F}$  NMR signal of the time averaged minimum was detected, while at lower temperature it splits into the signal of the complex and free FBN.

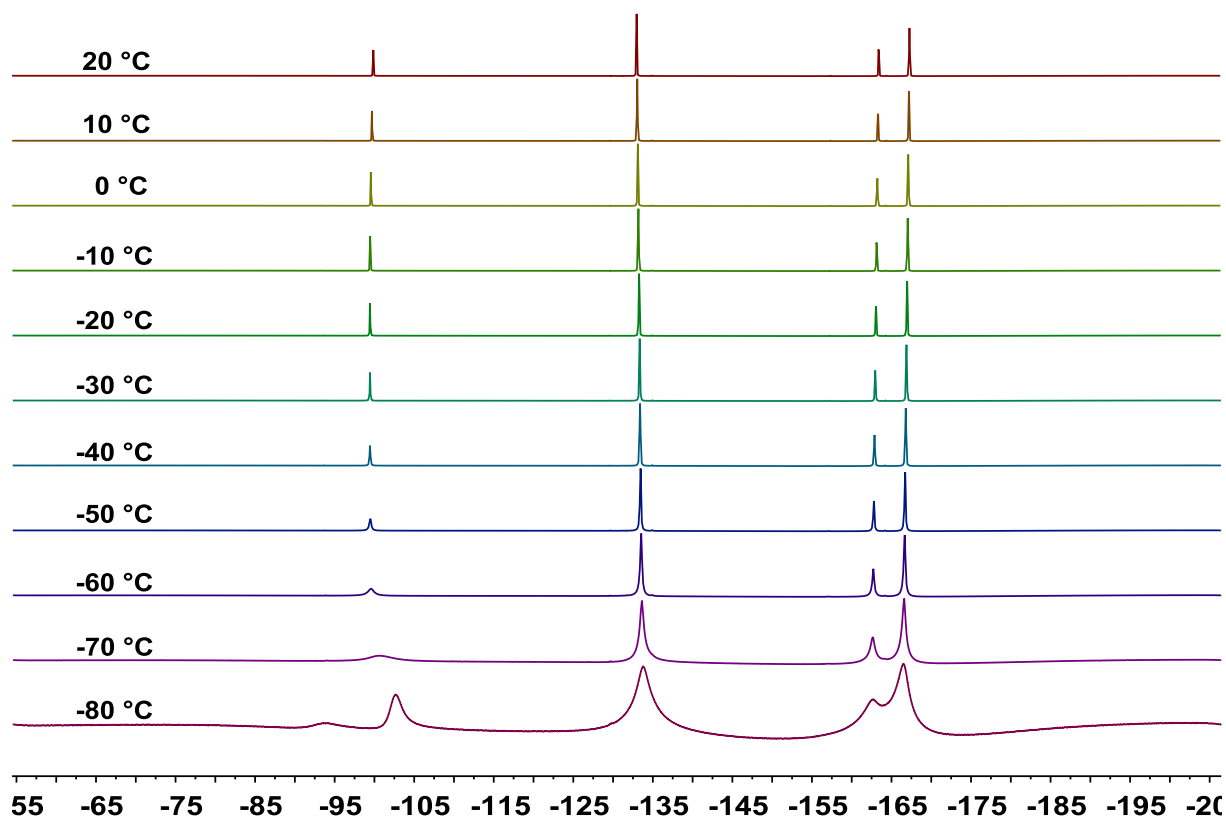

Figure S76 – VT  $^1\text{H}$  NMR spectra (470.29 MHz,  $\text{CD}_2\text{Cl}_2$ ) of  $10\text{c}[\text{B}(\text{C}_6\text{F}_5)_4]$  with an excess 4-fluorobenzonitrile.

### 1.8. Reaction of bromonium borate $2\text{e}[\text{B}(\text{C}_6\text{F}_5)_4]$ with silane $7\text{c}$

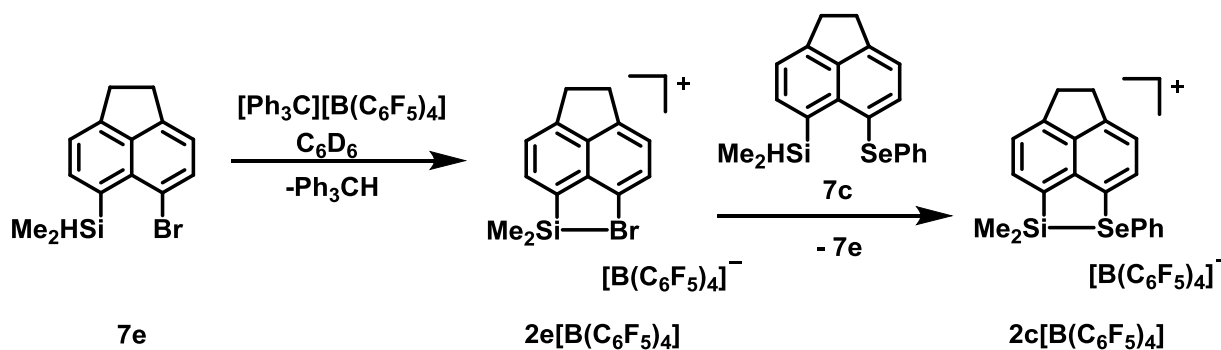

A Schlenk tube was charged with silane **7e** (1.1 equiv., 128 mg, 441  $\mu\text{mol}$ ) and trityl borate  $[\text{Ph}_3\text{C}][\text{B}(\text{C}_6\text{F}_5)_4]$  (1.0 equiv., 370 mg, 401  $\mu\text{mol}$ ). The solids were dissolved in benzene- $d_6$  and the solution of the silane was slowly added to the solution of trityl borate while cooling at 5  $^\circ\text{C}$ . Then the reaction mixture was stirred at r.t. for 30 min. The phases were separated, the upper, nonpolar phase was removed and the polar phase was transferred into an NMR tube and analyzed by NMR spectroscopy.



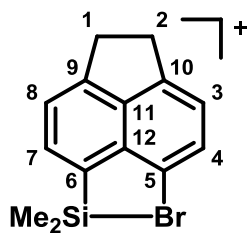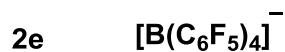

$^1\text{H NMR}$  (500.13 MHz, 297.7 K,  $\text{C}_6\text{D}_6$ ):  $\delta = 0.61$  (s, 6H,  $\text{Si}(\underline{\text{C}}\text{H}_3)_2$ ), 2.93-3.01 (m, 4H, 2 x  $\text{CH}_2$ ), 6.89 (d, 1H,  $^3J_{\text{H,H}} = 7.4$  Hz), 6.98 (d, 1H,  $^3J_{\text{H,H}} = 7.4$  Hz), 7.10-7.14 (m, 1H, H-8, overlapping with  $\text{Ph}_3\text{CH}$ ), 7.25 (d, 1H,  $^3J_{\text{H,H}} = 6.9$  Hz, H-7).

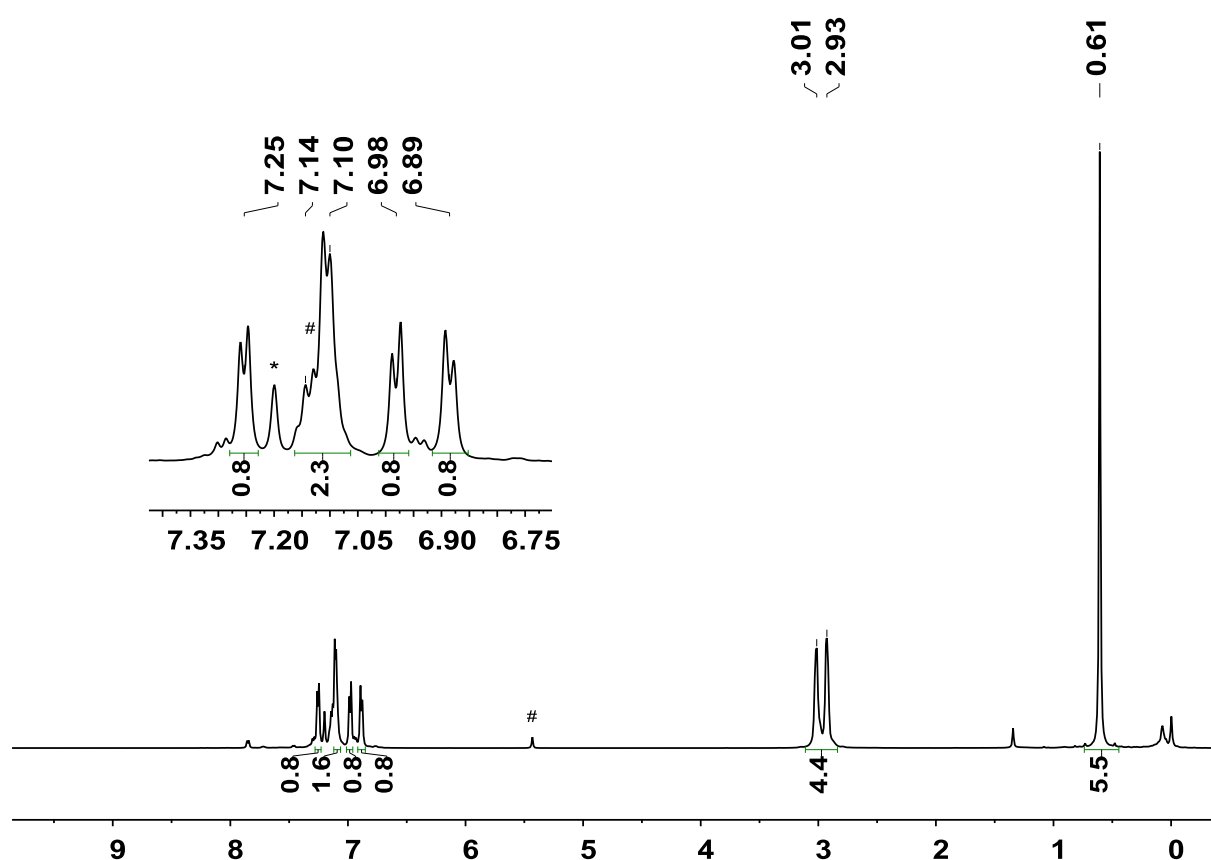

Figure S77 –  $^1\text{H NMR}$  (500.13 MHz, 297.7 K,  $^*\text{C}_6\text{D}_6$ ,  $\#\text{Ph}_3\text{CH}$ ) of  $2\text{e}[\text{B}(\text{C}_6\text{F}_5)_4]$ .

The solution of silyl borate  $2\text{e}[\text{B}(\text{C}_6\text{F}_5)_4]$  was then added to a Schlenk tube, charged with silane  $7\text{c}$  (1.0 equiv., 148 mg, 401  $\mu\text{mol}$ ). After stirring for 30 min, the mixture was transferred into an NMR tube for analysis. The obtained NMR spectroscopic data indicated the formation of silyl borate  $2\text{c}[\text{B}(\text{C}_6\text{F}_5)_4]$  [S6] and silane  $7\text{e}$ .

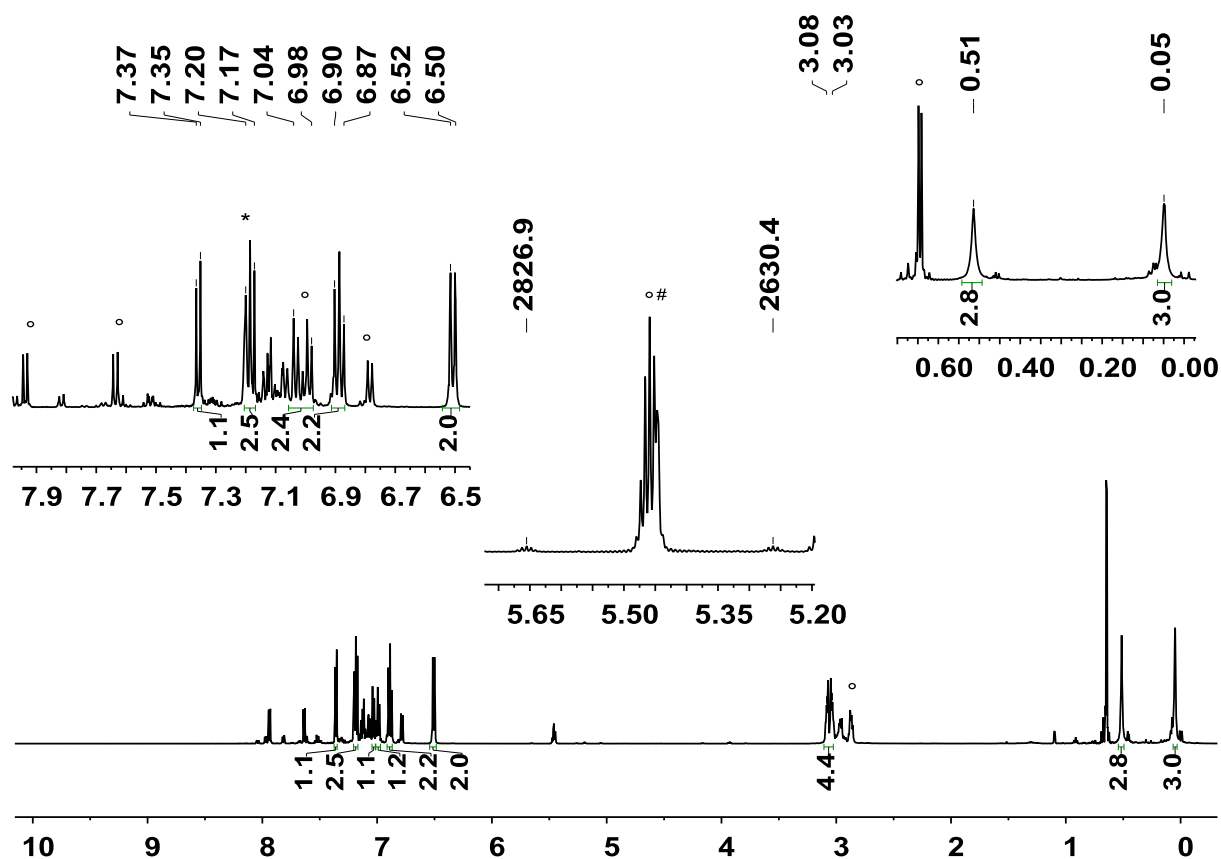

Figure S78 –  $^1\text{H}$  NMR (499.87 MHz, 305.1 K,  $^*\text{C}_6\text{D}_6$ ,  $\text{Ph}_3\text{CH}$ ,  $^{\circ}$ 5-bromo-6-dimethylsilylacenaphthen 7e) of the reaction mixture containing silyl borate  $2\text{c}[\text{B}(\text{C}_6\text{F}_5)_4]$ .

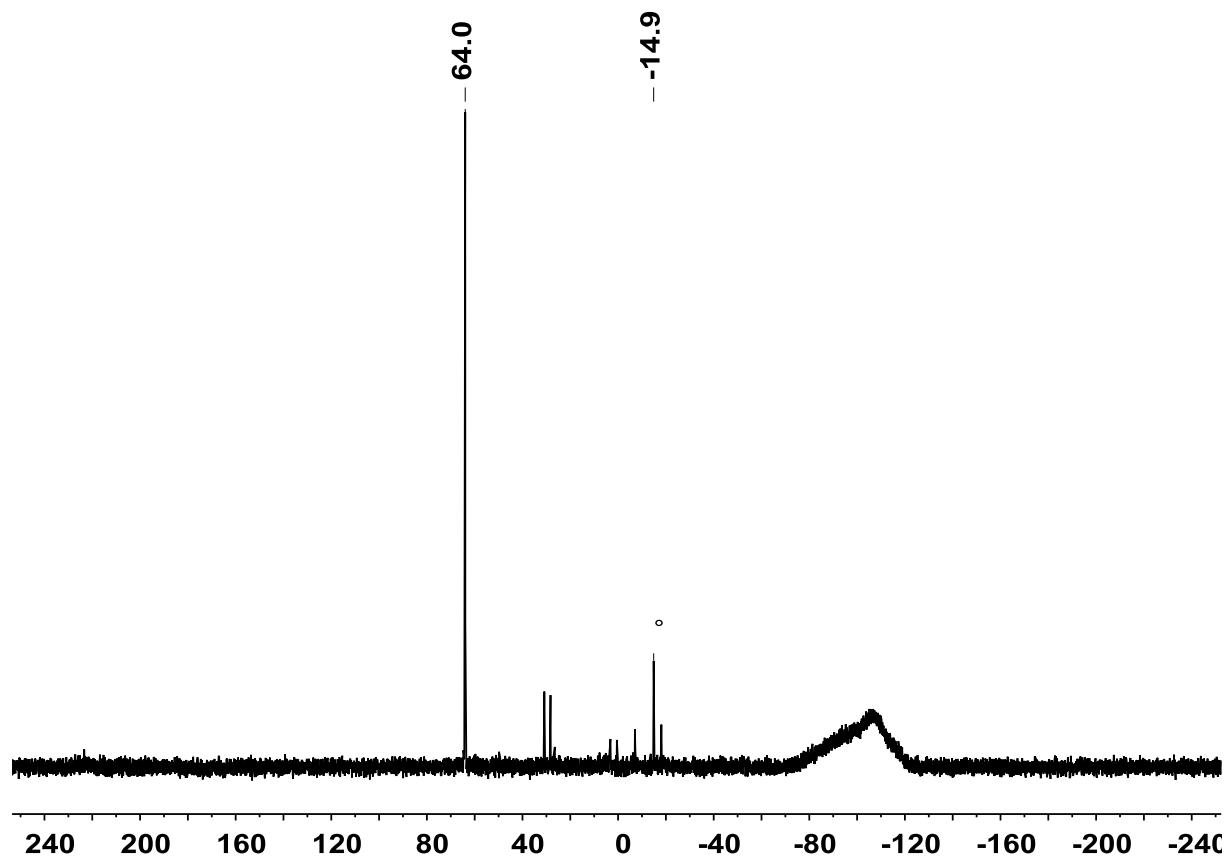

Figure S79 –  $^{29}\text{Si}\{^1\text{H}\}$  NMR spectrum (99.31 MHz, 305.0 K,  $\text{C}_6\text{D}_6$ ,  $^{\circ}$ 5-bromo-6-dimethylsilylacenaphthen 7e) of the reaction mixture containing silyl borate  $2\text{c}[\text{B}(\text{C}_6\text{F}_5)_4]$ .

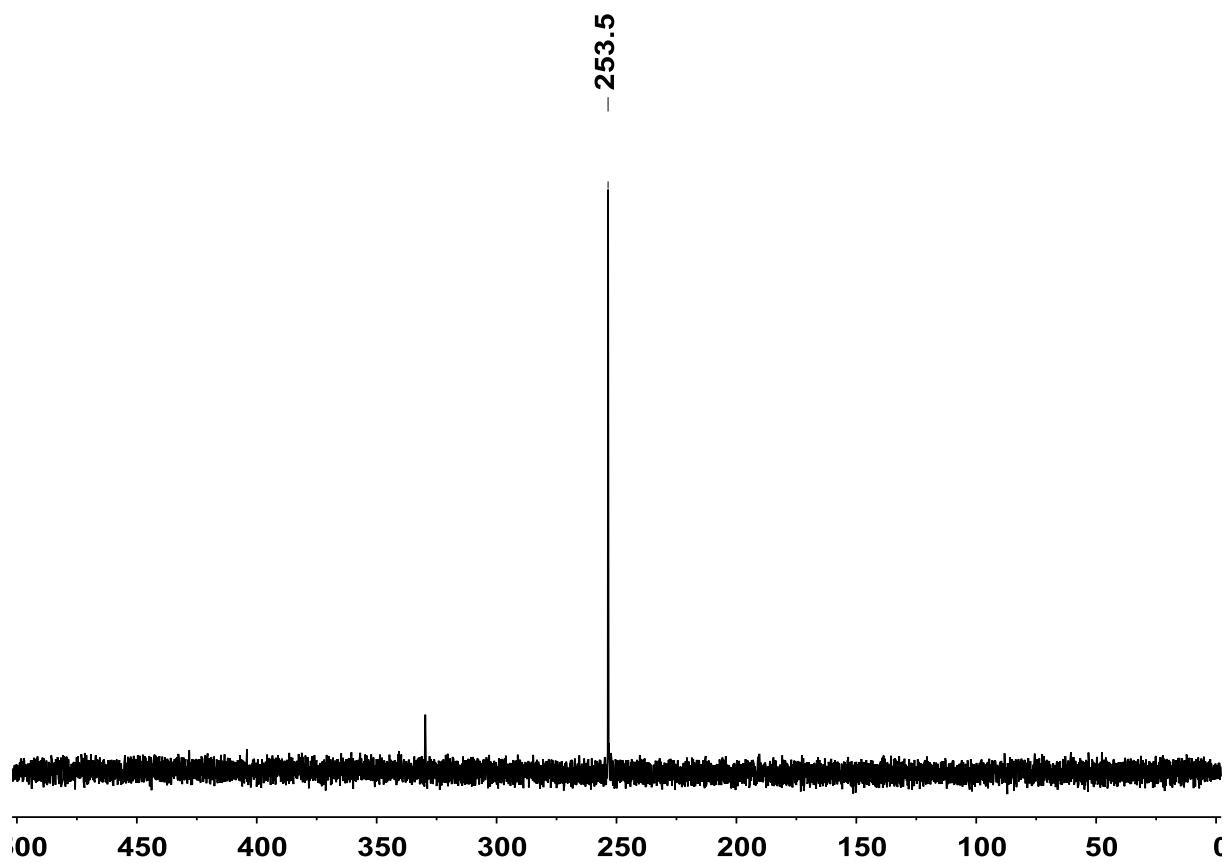

Figure S80 –  $^{77}\text{Se}\{^1\text{H}\}$  NMR spectrum (95.36 MHz, 305.0 K,  $\text{C}_6\text{D}_6$ ) of the reaction mixture containing silyl borate  $2\text{c}[\text{B}(\text{C}_6\text{F}_5)_4]$ .

### 1.9. Data from X-ray diffraction analysis of compounds

Single crystal X-ray data were measured on a *Bruker AXS Apex-II CCD* diffractometer with graphite-monochromated Mo-K $\alpha$  radiation ( $\lambda = 71.073$  pm, Kappa 4 circle goniometer, *Bruker Apex II* detector). Absorption corrections based on symmetry-related measurements (multi-scan) were performed with the program SADABS.[10] The structures were solved with the program SHELXS and refined with SHELXL.[S11] Pertinent data are summarized in Tables S2 - 3. CCDC-1935621 and CCDC-1935639, contain the supplementary crystallographic data for this paper. These data can be obtained free of charge from The Cambridge Crystallographic Data Centre. The Director, CCDC, 12 Union Road, Cambridge CB2 1EZ, UK [Fax: (internat.) +44-1223/336-033; E-mail: [deposit@ccdc.cam.ac.uk](mailto:deposit@ccdc.cam.ac.uk)].

#### 1.9.1. Data from X-ray diffraction analysis of compound BCF adduct 4

Colorless needles of compound **4** that were suitable for X-ray diffraction analysis were obtained by adding *n*-hexane to a solution of nitrilium borate **10e**[B(C<sub>6</sub>F<sub>5</sub>)<sub>4</sub>] in CD<sub>2</sub>Cl<sub>2</sub> at room temperature.

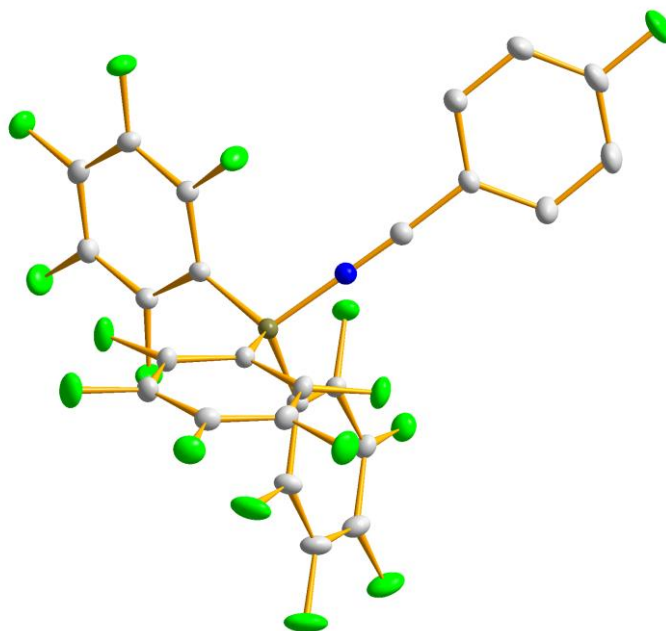

Figure S81 – Molecular structure of complex **4** in the crystal. Pertinent bond lengths and angles: B–N 158.77(11) pm; C–N 114.56(10) pm; C–C<sup>*ipso*</sup> 142.47(10) pm; B–N–C 179.732(77)°;  $\sum\alpha(\text{CBC}) = 340.0^\circ$ . (Thermal ellipsoids drawn at 50%, color code: grey carbon; green fluorine; blue nitrogen, brown boron).

Table S2 – Crystal data and structure refinement for compound 4 (CCDC-1935621).

|                                   |                                                    |                   |
|-----------------------------------|----------------------------------------------------|-------------------|
| Identification code               | skd14                                              |                   |
| Empirical formula                 | C <sub>25</sub> H <sub>4</sub> B F <sub>16</sub> N |                   |
| Formula weight                    | 633.10                                             |                   |
| Temperature                       | 100(2) K                                           |                   |
| Wavelength                        | 0.71073 Å                                          |                   |
| Crystal system                    | Monoclinic                                         |                   |
| Space group                       | P2 <sub>1</sub> /c                                 |                   |
| Unit cell dimensions              | a = 12.6503(4) Å                                   | a = 90°.          |
|                                   | b = 12.0109(4) Å                                   | b = 94.2726(13)°. |
|                                   | c = 14.7028(4) Å                                   | g = 90°.          |
| Volume                            | 2227.76(12) Å <sup>3</sup>                         |                   |
| Z                                 | 4                                                  |                   |
| Density (calculated)              | 1.888 Mg/m <sup>3</sup>                            |                   |
| Absorption coefficient            | 0.205 mm <sup>-1</sup>                             |                   |
| F(000)                            | 1240                                               |                   |
| Crystal size                      | 0.460 x 0.180 x 0.160 mm <sup>3</sup>              |                   |
| Theta range for data collection   | 1.614 to 36.317°                                   |                   |
| Index ranges                      | -21 ≤ h ≤ 21, -20 ≤ k ≤ 20, -24 ≤ l ≤ 24           |                   |
| Reflections collected             | 118890                                             |                   |
| Independent reflections           | 10787 (R(int) = 0.0282)                            |                   |
| Observed reflections (I > 2(I))   | 8916                                               |                   |
| Completeness to theta = 36.317°   | 100.0 %                                            |                   |
| Absorption correction             | Semi-empirical from equivalents                    |                   |
| Max. and min. transmission        | 1.0000 and 0.9700                                  |                   |
| Refinement method                 | Full-matrix least-squares on F <sup>2</sup>        |                   |
| Data / restraints / parameters    | 10787 / 0 / 388                                    |                   |
| Goodness-of-fit on F <sup>2</sup> | 1.097                                              |                   |
| Final R indices (I > 2σ(I))       | R1 = 0.0347, wR2 = 0.0945                          |                   |
| R indices (all data)              | R1 = 0.0446, wR2 = 0.1013                          |                   |
| Extinction coefficient            | n/a                                                |                   |
| Largest diff. peak and hole       | 0.609 and -0.226 e.Å <sup>-3</sup>                 |                   |

### 1.9.2. Data from X-ray diffraction analysis of compound $[2c]_2[B_{12}Br_{12}]$

The crystals of silyl cation **2c** were obtained from a mixture of silane **7c**, *p*-fluorobenzonitrile and half of an equivalent trityl *c*loso-borate  $[Ph_3C]_2[B_{12}Br_{12}]$  in dichloro methane ( $c = 0.12 \text{ mol}\cdot\text{L}^{-1}$ ). The resulting mixture was then slowly covered with hexane and/or toluene. After a while green crystals grew at the phase boundary.

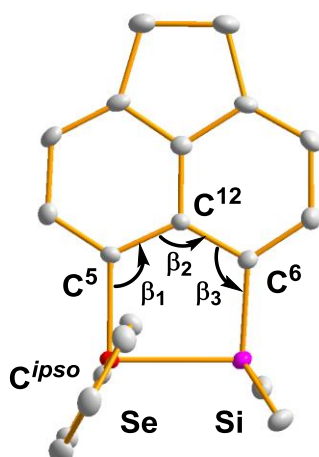

Figure S82 – Molecular structure of cation **2c** in the crystal of  $[2c]_2[B_{12}Br_{12}] \times 8 [H_2CCl_2]$ . Pertinent bond lengths and angles: Se–Si 243.05(6) pm; Se–C<sup>5</sup> 192.4(2) pm; Si–C<sup>6</sup> 185.2(2) pm;  $\beta_1$  115.37(16)°;  $\beta_2$  125.7(2)°;  $\beta_3$  114.85(16)°; C<sup>5</sup>–Se–C<sup>ipso</sup> 101.19(9)°; C<sup>6</sup>–C<sup>1</sup>–Se–Si -7.941(67)°;  $\Sigma\alpha(\text{SiC}_3)$  346.06(3)°;  $\Sigma\alpha(\text{Se}) = 288.41(2)$ °;  $\Sigma\beta = 355.9(4)$ °. (Thermal ellipsoids drawn at 50%, hydrogen atoms omitted).

Table S3 – Crystal data and structure refinement for compound [2c]<sub>2</sub>[B<sub>12</sub>Br<sub>12</sub>] (CCDC-1935639).

|                                   |                                                                                                                   |
|-----------------------------------|-------------------------------------------------------------------------------------------------------------------|
| Identification code               | sara21                                                                                                            |
| Empirical formula                 | C <sub>48</sub> H <sub>54</sub> B <sub>12</sub> Br <sub>12</sub> Cl <sub>16</sub> Se <sub>2</sub> Si <sub>2</sub> |
| Formula weight                    | 2500.85                                                                                                           |
| Temperature                       | 100(2) K                                                                                                          |
| Wavelength                        | 0.71073 Å                                                                                                         |
| Crystal system                    | Orthorhombic                                                                                                      |
| Space group                       | Pbca                                                                                                              |
| Unit cell dimensions              | a = 17.2140(9) Å    α = 90°.<br>b = 17.6120(9) Å    β = 90°.<br>c = 26.9095(14) Å    γ = 90°.                     |
| Volume                            | 8158.2(7) Å <sup>3</sup>                                                                                          |
| Z                                 | 4                                                                                                                 |
| Density (calculated)              | 2.036 Mg/m <sup>3</sup>                                                                                           |
| Absorption coefficient            | 7.372 mm <sup>-1</sup>                                                                                            |
| F(000)                            | 4760                                                                                                              |
| Crystal size                      | 0.280 x 0.240 x 0.050 mm <sup>3</sup>                                                                             |
| Theta range for data collection   | 1.513 to 32.031°                                                                                                  |
| Index ranges                      | -25 ≤ h ≤ 25, -26 ≤ k ≤ 26, -40 ≤ l ≤ 39                                                                          |
| Reflections collected             | 206929                                                                                                            |
| Independent reflections           | 14214 (R(int) = 0.0714)                                                                                           |
| Observed reflections              | (I > 2(I))    10981                                                                                               |
| Completeness to theta = 32.031°   | 100.0 %                                                                                                           |
| Absorption correction             | Numerical                                                                                                         |
| Max. and min. transmission        | 0.7293 and 0.1754                                                                                                 |
| Refinement method                 | Full-matrix least-squares on F <sup>2</sup>                                                                       |
| Data / restraints / parameters    | 14214 / 0 / 453                                                                                                   |
| Goodness-of-fit on F <sup>2</sup> | 0.995                                                                                                             |
| Final R indices (I > 2σ(I))       | R1 = 0.0291, wR2 = 0.0512                                                                                         |
| R indices (all data)              | R1 = 0.0520, wR2 = 0.0564                                                                                         |
| Extinction coefficient            | n/a                                                                                                               |
| Largest diff. peak and hole       | 1.395 and -1.180 e.Å <sup>-3</sup>                                                                                |

## 2. Computational Details

All quantum chemical calculations were carried out using the Gaussian09 package.[S12] The molecular structure optimizations were performed using the M06-2X functional [S13] along with the def2-tzvp basis set for the elements F, I, Br, Te, Se, S, O, Si, C, B, H and using the corresponding pseudopotential for Te and I.[S14] Every stationary point was identified by a subsequent frequency calculation either as minimum (Number of imaginary frequencies (NIMAG): 0). We calculated the fluorine ion affinity (FIA) for cations **2** and **9** versus  $\text{BEt}_3$  at the M06-2X/def2-TZVP level of theory with inclusion of solvent effects using the SCIPM model with methylene chloride. The SCF energies ( $E(\text{SCF})$ ) and the absolute computed Gibbs free energies at  $T = 298.15 \text{ K}$  and  $p = 0.101 \text{ MPa}$  (1 atm) in the gas phase ( $G_{298}$ ) are given in Tables S4 and S5 for all optimized molecular structures. The optimized molecular structures of compounds **2**, **9-13**, FBN,  $\text{BEt}_3$ ,  $[\text{FBEt}_3]^+$ , BCF,  $[\text{FBCF}]^+$  are given as cartesian coordinates in the structure file (Computed\_Molecular\_structures.xyz).

Table S4 – Calculated absolute energies ( $E(\text{SCF})$ ) and free enthalpies at 298 K ( $G_{298}$ ), at M06-2X/Def-2TZVP.

| Compound                       | $E(\text{SCF})$ [a.u.] | ZPVE [ $\text{kJmol}^{-1}$ ] | $G_{298}$ [a.u.] |
|--------------------------------|------------------------|------------------------------|------------------|
| Ace -OPh nitrilium <b>10a</b>  | -1561.81304            | 1125                         | -1561.44779      |
| Ace -OPh cation <b>2a</b>      | -1138.04862            | 878                          | -1137.76254      |
| Ace -OPh fluoride <b>12a</b>   | -1238.20091            | 885                          | -1237.91494      |
|                                |                        |                              |                  |
| Naph-OPh nitrilium <b>11a</b>  | -1484.39743            | 1035                         | -1484.06303      |
| Naph-OPh cation <b>9a</b>      | -1060.63519            | 787                          | -1060.38124      |
| Naph-OPh fluoride <b>13a</b>   | -1160.78454            | 793                          | -1160.53113      |
|                                |                        |                              |                  |
| Ace-SPh nitrilium <b>10b</b>   | -1884.77898            | 1118                         | -1884.41449      |
| Ace-SPh cation <b>2b</b>       | -1461.02458            | 870                          | -1460.74233      |
| Ace- SPh fluoride <b>12b</b>   | -1561.16313            | 878                          | -1560.87980      |
|                                |                        |                              |                  |
| Ace-SePh nitrilium <b>10c</b>  | -3888.16376            | 1115                         | -3887.80097      |
| Ace-SePh cation <b>2c</b>      | -3464.41101            | 867                          | -3464.13112      |
| Ace-SePh fluoride <b>12c</b>   | -3564.54765            | 874                          | -3564.26783      |
|                                |                        |                              |                  |
| Naph-SePh nitrilium <b>11c</b> | -3810.74308            | 1023                         | -3810.41519      |
| Naph-SePh cation <b>9c</b>     | -3386.99168            | 777                          | -3386.74370      |
| Naph-SePh fluoride <b>13c</b>  | -3487.12705            | 783                          | -3486.87826      |
|                                |                        |                              |                  |
| Ace-TeMes nitrilium <b>10d</b> | -1872.44664            | 1331                         | -1872.00878      |
| Ace-TeMes cation <b>2d</b>     | -1448.69925            | 1084                         | -1448.34329      |
| Ace-TeMes fluoride <b>12d</b>  | -1548.83205            | 1090                         | -1548.47630      |
|                                |                        |                              |                  |



|                             |             |     |             |
|-----------------------------|-------------|-----|-------------|
| Ace-Br nitrilium <b>10e</b> | -3829.13620 | 875 | -3828.86200 |
| Ace-Br cation <b>2e</b>     | -3405.36322 | 626 | -3405.16796 |
| Ace-Br fluoride <b>12e</b>  | -3505.52743 | 635 | -3505.33072 |
|                             |             |     |             |
| Ace-I nitrilium <b>10f</b>  | -1552.56799 | 874 | -1552.29293 |
| Ace-I cation <b>2f</b>      | -1128.80006 | 625 | -1128.60597 |
| Ace-I fluoride <b>12f</b>   | -1228.95914 | 634 | -1228.76344 |
|                             |             |     |             |
| Nap-Br nitrilium <b>11e</b> | -3751.71364 | 783 | -3751.47150 |
| Nap-Br cation <b>9e</b>     | -3327.94326 | 533 | -3327.78120 |
| Nap-Br fluoride <b>13e</b>  | -3428.10633 | 542 | -3427.94224 |
|                             |             |     |             |
| Ace-H nitrilium <b>6</b>    | -1255.54149 | 900 | -1255.25328 |
| Ace- H cation <b>5</b>      | -831.74406  | 652 | -831.53745  |
| Ace- H fluoride             | -931.93853  | 659 | -931.72989  |
|                             |             |     |             |
| 4-Fluorbenzonitril          | -423.72783  | 245 | -423.66734  |
|                             |             |     |             |
| BEt3                        | -262.48406  | 527 | -262.31828  |
| FBEt3                       | -362.43997  | 530 | -362.27401  |
|                             |             |     |             |
| BCF adduct <b>4</b>         | -2632.23189 | 662 | -2632.05191 |
| BCF flouride                | -2308.49985 | 418 | -2308.40367 |
| BCF                         | -2208.47342 | 416 | -2208.37364 |

Table S5 – Calculated absolute energies (E(SCF)) and free enthalpies at 298 K (G(298)), at M06-2X/Def2-TZVP in DCM, \*single point.

| Compound                       | E(SCF) [a.u.] | ZPVE [kJmol <sup>-1</sup> ] | G(298) [a.u.] |
|--------------------------------|---------------|-----------------------------|---------------|
| Ace -OPh nitrilium <b>10a</b>  | -1561.86583   | 1125                        | -1561.50064   |
| Ace -OPh cation <b>2a</b>      | -1138.10159   | 877                         | -1137.81614   |
| Ace -OPh cation* <b>2a</b>     | -1138.10148*  |                             |               |
| Ace -OPh fluoride* <b>12a</b>  | -1238.20704*  |                             |               |
|                                |               |                             |               |
| Naph-OPh nitrilium <b>11a</b>  | -1484.45004   | 1034                        | -1484.11609   |
| Naph-OPh cation* <b>9a</b>     | -1060.69028*  |                             |               |
| Naph-OPh fluoride* <b>13a</b>  | -1160.79066*  |                             |               |
|                                |               |                             |               |
| Ace-SPh nitrilium <b>10b</b>   | -1884.82958   | 1119                        | -1884.46472   |
| Ace-SPh cation <b>2b</b>       | -1461.07688   | 870                         | -1460.79387   |
| Ace-SPh cation* <b>2b</b>      | -1461.07677*  |                             |               |
| Ace- SPh fluoride* <b>12b</b>  | -1561.16960*  |                             |               |
|                                |               |                             |               |
| Ace-SePh nitrilium <b>10c</b>  | -3888.21448   | 1116                        | -3887.85199   |
| Ace-SePh cation <b>2c</b>      | -3464.46358   | 867                         | -3464.18276   |
| Ace-SePh cation* <b>2c</b>     | -3464.46350*  |                             |               |
| Ace- SePh fluoride* <b>12c</b> | -3564.55429*  |                             |               |
|                                |               |                             |               |
| Naph-SePh nitrilium <b>11c</b> | -3810.79472   | 1024                        | -3810.46509   |

|                                |              |      |             |
|--------------------------------|--------------|------|-------------|
| Naph-SePh cation <b>9c</b>     | -3387.04627  | 777  | -3386.79757 |
| Naph-SePh cation* <b>9c</b>    | -3387.04608  |      |             |
| Naph-SePh fluoride* <b>13c</b> | -3487.13339  |      |             |
|                                |              |      |             |
| Ace-TeMes nitrilium <b>10d</b> | -1872.49669  | 1331 | -1872.05979 |
| Ace-TeMes cation <b>2d</b>     | -1448.74997  | 1084 | -1448.39282 |
| Ace-TeMes cation* <b>2d</b>    | -1448.74951* |      |             |
| Ace-TeMes fluoride* <b>12d</b> | -1548.83841* |      |             |
|                                |              |      |             |
| Ace-Br nitrilium <b>10e</b>    | -3829.19102  | 876  | -3828.91326 |
| Ace-Br cation <b>2e</b>        | -3405.42051  | 626  | -3405.22577 |
| Ace-Br cation*                 | -3405.42042* |      |             |
| Ace-Br fluoride *              | -3505.53338* |      |             |
|                                |              |      |             |
| Ace-I nitrilium <b>10f</b>     | -1552.62238  | 874  | -1552.34662 |
| Ace-I cation <b>2f</b>         | -1128.85687  | 624  | -1128.66403 |
| Ace-I cation*                  | -1128.85683* |      |             |
| Ace-I fluoride *               | -1228.96507* |      |             |
|                                |              |      |             |
| Nap-Br nitrilium <b>11e</b>    | -3751.76922  | 783  | -3751.52572 |
| Nap-Br cation <b>9e</b>        | -3328.00313  | 534  | -3327.84101 |
| Nap-Br cation*                 | -3328.00303* |      |             |
| Nap-Br fluoride*               | -3428.11190* |      |             |
|                                |              |      |             |
| Ace-H nitrilium <b>6</b>       | -1255.60066  | 901  | -1255.31104 |
| Ace-H cation* <b>5</b>         | -831.80471*  |      |             |
| Ace-H fluoride*                | -931.94356*  |      |             |
|                                |              |      |             |
| 4-Fluorbenzotrilit             | -423.73492   | 241  | -423.67447  |
|                                |              |      |             |
| BEt <sub>3</sub>               | -262.48460   | 526  | -262.31938  |
| BEt <sub>3</sub> *             | -262.48460*  |      |             |
| FBEt <sub>3</sub>              | -362.50853   | 530  | -362.34316  |
| FBEt <sub>3</sub> *            | -362.50824*  |      |             |
|                                |              |      |             |
| BCF                            | -2208.47945  | 413  | -2208.38237 |
| BCF*                           | -2208.47918* |      |             |
| BCF fluoride                   | -2308.54999  | 417  | -2308.45354 |
| BCF fluoride*                  | -2308.54966* |      |             |
|                                |              |      |             |

## 2.1. Computed Structures XYZ-files

43

ace-H-SiMe<sub>2</sub> nitrilium 6 opt

|   |             |             |             |
|---|-------------|-------------|-------------|
| C | -5.63837300 | -0.45750100 | 0.00321100  |
| C | -4.98555300 | 0.74425500  | -0.01038300 |
| C | -3.57863900 | 0.75060300  | -0.01046500 |

|    |             |             |             |
|----|-------------|-------------|-------------|
| C  | -2.78950400 | -0.40745900 | 0.00277200  |
| C  | -4.87018900 | -1.64573600 | 0.01669400  |
| H  | -6.71896400 | -0.51899100 | 0.00381500  |
| C  | -3.05508300 | 2.05648000  | -0.02564400 |
| C  | -1.36908900 | -0.21770300 | 0.00033000  |
| H  | -5.38712800 | -2.59674600 | 0.02739100  |
| C  | -0.87468100 | 1.07390600  | -0.01533800 |
| C  | -1.69747800 | 2.22426100  | -0.02837200 |
| H  | 0.19704700  | 1.23766000  | -0.01839300 |
| H  | -1.24352700 | 3.20670200  | -0.04026600 |
| C  | -4.19692000 | 3.04413000  | -0.03660300 |
| H  | -4.14800700 | 3.70211400  | 0.83172000  |
| H  | -4.14809300 | 3.68262000  | -0.91934800 |
| C  | -5.48465500 | 2.17048100  | -0.02670100 |
| H  | -6.10355000 | 2.37749300  | 0.84671600  |
| H  | -6.10342400 | 2.35748400  | -0.90470800 |
| C  | -0.28012300 | -2.68864500 | 1.58626100  |
| H  | -1.25819300 | -3.15111000 | 1.73128700  |
| H  | 0.46727900  | -3.48258500 | 1.55961500  |
| H  | -0.09225700 | -2.04717400 | 2.44785500  |
| C  | -0.27285900 | -2.72292500 | -1.52675500 |
| H  | 0.47411900  | -3.51631100 | -1.47941900 |
| H  | -1.25040300 | -3.18850500 | -1.66543800 |
| H  | -0.08158500 | -2.10057400 | -2.40152000 |
| Si | -0.28547500 | -1.70603700 | 0.01876700  |
| N  | 1.42887700  | -0.99379900 | 0.01309800  |
| C  | 2.50332400  | -0.59295400 | 0.00970200  |
| C  | 3.82556600  | -0.09576800 | 0.00457800  |
| C  | 4.50151000  | 0.03738700  | -1.21589400 |
| C  | 4.43147200  | 0.25141100  | 1.21966900  |
| C  | 5.79135900  | 0.52034900  | -1.21921800 |
| H  | 4.01570000  | -0.23608100 | -2.14258600 |
| C  | 5.72140000  | 0.73421600  | 1.21212500  |
| H  | 3.89236000  | 0.14117600  | 2.15068300  |
| C  | 6.37611900  | 0.85908700  | -0.00611300 |
| H  | 6.35333500  | 0.64038400  | -2.13472100 |
| H  | 6.23089000  | 1.01500100  | 2.12314900  |
| F  | 7.61082000  | 1.32099600  | -0.01118100 |
| C  | -3.49590000 | -1.63562100 | 0.01666700  |
| H  | -2.96868300 | -2.58394700 | 0.02721700  |

54

ace-OPh-SiMe2 nitrilium 10a opt

|   |             |            |             |
|---|-------------|------------|-------------|
| C | -4.38377400 | 2.14243900 | -0.00000100 |
| C | -3.38654100 | 3.07716400 | -0.00012500 |
| C | -2.05395900 | 2.62661000 | -0.00007600 |
| C | -1.68588400 | 1.28449400 | 0.00008300  |
| C | -2.74694200 | 0.35742400 | 0.00022100  |
| C | -4.05489300 | 0.75831900 | 0.00018000  |
| H | -5.42871400 | 2.42549200 | -0.00003000 |
| C | -1.11933800 | 3.67288800 | -0.00020500 |
| C | -0.30463300 | 0.94103500 | 0.00010500  |

|                                  |             |             |             |
|----------------------------------|-------------|-------------|-------------|
| H                                | -4.84726400 | 0.02144200  | 0.00029600  |
| C                                | 0.59853800  | 1.99029300  | -0.00002500 |
| C                                | 0.21324700  | 3.35408000  | -0.00017500 |
| H                                | 1.66193700  | 1.78615300  | -0.00001200 |
| H                                | 0.97959600  | 4.11898900  | -0.00026900 |
| C                                | -1.86940000 | 4.98501800  | -0.00033600 |
| H                                | -1.60889900 | 5.58092500  | 0.87520100  |
| H                                | -1.60886300 | 5.58079100  | -0.87595300 |
| C                                | -3.37950100 | 4.59041600  | -0.00033100 |
| H                                | -3.89321500 | 4.98719100  | 0.87571300  |
| H                                | -3.89314800 | 4.98693500  | -0.87652900 |
| O                                | -2.29894200 | -0.94912800 | 0.00043600  |
| C                                | 0.00747200  | -1.83863400 | 1.57358900  |
| H                                | -0.80588400 | -2.55929400 | 1.48274500  |
| H                                | 0.92283600  | -2.38957800 | 1.79013800  |
| H                                | -0.21046100 | -1.18315700 | 2.41767300  |
| C                                | -3.22647500 | -1.98727800 | 0.00038000  |
| C                                | -3.66489600 | -2.49520300 | -1.20998800 |
| C                                | -3.66491100 | -2.49529500 | 1.21070200  |
| C                                | -4.56418500 | -3.55259800 | -1.20330400 |
| H                                | -3.30942500 | -2.05810000 | -2.13469500 |
| C                                | -4.56419900 | -3.55269400 | 1.20392600  |
| H                                | -3.30946000 | -2.05825400 | 2.13544600  |
| C                                | -5.01157100 | -4.08111500 | 0.00028900  |
| H                                | -4.91705600 | -3.96139200 | -2.14078500 |
| H                                | -4.91708100 | -3.96155900 | 2.14137200  |
| H                                | -5.71148300 | -4.90575700 | 0.00025100  |
| C                                | 0.00718300  | -1.83898300 | -1.57278900 |
| H                                | 0.92268600  | -2.38955100 | -1.78969400 |
| H                                | -0.80580000 | -2.56000000 | -1.48141200 |
| H                                | -0.21147400 | -1.18376300 | -2.41688400 |
| Si                               | 0.14686200  | -0.86316700 | 0.00028100  |
| N                                | 2.04905100  | -0.64872300 | 0.00012000  |
| C                                | 3.19289600  | -0.58751000 | -0.00001300 |
| C                                | 4.60814300  | -0.50780400 | -0.00020500 |
| C                                | 5.29170400  | -0.47169400 | -1.22102600 |
| C                                | 5.29207500  | -0.47190400 | 1.22041500  |
| C                                | 6.66833300  | -0.40052900 | -1.21998500 |
| H                                | 4.74479300  | -0.49977000 | -2.15371600 |
| C                                | 6.66870400  | -0.40073800 | 1.21896600  |
| H                                | 4.74544800  | -0.50014800 | 2.15326600  |
| C                                | 7.32945900  | -0.36723000 | -0.00060700 |
| H                                | 7.23904500  | -0.37156000 | -2.13757900 |
| H                                | 7.23969300  | -0.37193100 | 2.13639200  |
| F                                | 8.64826600  | -0.30016800 | -0.00079900 |
| 50                               |             |             |             |
| naph-OPh-SiMe2 nitrilium 11a opt |             |             |             |
| C                                | 4.47126100  | 2.65678200  | -0.00849700 |
| C                                | 3.48687900  | 3.60171300  | -0.01618800 |
| C                                | 2.12220200  | 3.21721500  | -0.01767500 |
| C                                | 1.79674000  | 1.84388900  | -0.01068800 |

|    |             |             |             |
|----|-------------|-------------|-------------|
| C  | 2.85435600  | 0.91161600  | -0.00325600 |
| C  | 4.16473400  | 1.27430700  | -0.00196900 |
| H  | 5.51062800  | 2.95558700  | -0.00748600 |
| C  | 1.05712100  | 4.14690100  | -0.02629200 |
| C  | 0.45092400  | 1.38351600  | -0.01159600 |
| H  | 4.95320600  | 0.53486000  | 0.00370100  |
| C  | -0.54210700 | 2.33614100  | -0.02061500 |
| C  | -0.23961600 | 3.71469300  | -0.02801800 |
| H  | -1.58529800 | 2.05035600  | -0.02272700 |
| H  | -1.04900300 | 4.43251900  | -0.03520000 |
| O  | 2.38967400  | -0.39787300 | 0.00195200  |
| C  | 0.31930600  | -1.42867900 | -1.58813300 |
| H  | 0.99783400  | -2.27288700 | -1.45799000 |
| H  | -0.64255500 | -1.81709700 | -1.91792700 |
| H  | 0.72159600  | -0.79231800 | -2.37796500 |
| C  | 3.31876900  | -1.44632200 | 0.00837100  |
| C  | 3.75934900  | -1.93884600 | 1.22277200  |
| C  | 3.76285100  | -1.95015900 | -1.20010800 |
| C  | 4.66746800  | -2.98887000 | 1.22164900  |
| H  | 3.40053100  | -1.49962000 | 2.14458600  |
| C  | 4.67094700  | -3.00009300 | -1.18662600 |
| H  | 3.40656600  | -1.51956500 | -2.12697400 |
| C  | 5.11970700  | -3.51917000 | 0.02061600  |
| H  | 5.02312200  | -3.38931100 | 2.16131700  |
| H  | 5.02928800  | -3.40927000 | -2.12149400 |
| H  | 5.82748600  | -4.33693400 | 0.02545300  |
| C  | 0.31779300  | -1.40505400 | 1.60402500  |
| H  | -0.64509400 | -1.78438700 | 1.94127400  |
| H  | 0.99267000  | -2.25391000 | 1.48542300  |
| H  | 0.72425000  | -0.75851500 | 2.38339500  |
| H  | 3.73513900  | 4.65511200  | -0.02143500 |
| H  | 1.28523700  | 5.20558200  | -0.03186700 |
| Si | 0.19940200  | -0.46820400 | 0.00085800  |
| N  | -1.76060000 | -0.38314500 | -0.00194000 |
| C  | -2.90545300 | -0.42292600 | -0.00051400 |
| C  | -4.32443000 | -0.46463400 | 0.00148300  |
| C  | -5.01075300 | -0.38257400 | 1.21810700  |
| C  | -5.00852000 | -0.58724200 | -1.21298600 |
| C  | -6.38891400 | -0.42396200 | 1.21954900  |
| H  | -4.46487100 | -0.28748800 | 2.14682900  |
| C  | -6.38664900 | -0.62871200 | -1.21001000 |
| H  | -4.46100500 | -0.64865300 | -2.14355600 |
| C  | -7.04975900 | -0.54644200 | 0.00584600  |
| H  | -6.96046300 | -0.36380500 | 2.13496200  |
| H  | -6.95647000 | -0.72281000 | -2.12364800 |
| F  | -8.37031500 | -0.58623500 | 0.00797800  |

54

ace-SPh-SiMe2 nitrilium 10b opt

|   |             |            |             |
|---|-------------|------------|-------------|
| C | -4.37064000 | 2.28011300 | 0.84190100  |
| C | -3.45203600 | 3.02344700 | 0.14779200  |
| C | -2.18394000 | 2.47197600 | -0.10741300 |

|    |             |             |             |
|----|-------------|-------------|-------------|
| C  | -1.78400900 | 1.19816000  | 0.30952200  |
| C  | -2.77182900 | 0.44798100  | 0.99366800  |
| C  | -4.01451700 | 0.97697200  | 1.25725100  |
| H  | -5.35968500 | 2.65774800  | 1.06647400  |
| C  | -1.36540200 | 3.33311200  | -0.85787600 |
| C  | -0.46007800 | 0.76640000  | 0.00106900  |
| H  | -4.74314100 | 0.37046200  | 1.78098200  |
| C  | 0.32073200  | 1.63041000  | -0.74798500 |
| C  | -0.11211700 | 2.90260700  | -1.19597900 |
| H  | 1.32708800  | 1.34115400  | -1.01988900 |
| H  | 0.55866600  | 3.51247700  | -1.78770700 |
| C  | -2.12850700 | 4.60421500  | -1.14552600 |
| H  | -1.60137300 | 5.47516000  | -0.75475400 |
| H  | -2.23536600 | 4.75597000  | -2.22037400 |
| C  | -3.51024500 | 4.40745900  | -0.45470500 |
| H  | -3.68152100 | 5.15767300  | 0.31819900  |
| H  | -4.33337700 | 4.49195300  | -1.16471500 |
| S  | -2.35871600 | -1.21444700 | 1.41682600  |
| C  | 0.60115700  | -0.78299100 | 2.57598400  |
| H  | -0.27085800 | -0.78715000 | 3.22608300  |
| H  | 1.21577100  | -1.64974800 | 2.82892500  |
| H  | 1.17976400  | 0.11672100  | 2.78990800  |
| C  | -3.06804600 | -2.16390800 | 0.08425900  |
| C  | -3.27550900 | -3.51497300 | 0.33625100  |
| C  | -3.35671200 | -1.61846900 | -1.15953000 |
| C  | -3.76478500 | -4.32981700 | -0.67395900 |
| H  | -3.06691700 | -3.92436600 | 1.31750400  |
| C  | -3.85564600 | -2.44229800 | -2.15872900 |
| H  | -3.20126500 | -0.56396400 | -1.34816700 |
| C  | -4.05553600 | -3.79556500 | -1.92131500 |
| H  | -3.93174800 | -5.38086000 | -0.47884300 |
| H  | -4.08812400 | -2.02119600 | -3.12813300 |
| H  | -4.44573900 | -4.43119400 | -2.70476300 |
| C  | 0.12916000  | -2.47545800 | -0.12427700 |
| H  | 1.12556500  | -2.79724600 | -0.42313800 |
| H  | -0.29298200 | -3.23974500 | 0.52994000  |
| H  | -0.50037000 | -2.42548300 | -1.01375500 |
| Si | 0.16529600  | -0.83304600 | 0.75870900  |
| N  | 2.07982900  | -0.50194800 | 0.28958900  |
| C  | 3.21423900  | -0.41042500 | 0.15919300  |
| C  | 4.62023800  | -0.28060200 | -0.00124100 |
| C  | 5.28404800  | -1.07069500 | -0.94483800 |
| C  | 5.31395900  | 0.63847000  | 0.79267900  |
| C  | 6.64858100  | -0.93988400 | -1.09591300 |
| H  | 4.73145300  | -1.77670900 | -1.54981700 |
| C  | 6.67838000  | 0.76880100  | 0.64102400  |
| H  | 4.78377800  | 1.23966400  | 1.51884400  |
| C  | 7.31898600  | -0.02235000 | -0.30070300 |
| H  | 7.20231100  | -1.52970700 | -1.81284100 |
| H  | 7.25446500  | 1.46547300  | 1.23373700  |
| F  | 8.62672900  | 0.10380200  | -0.44728800 |

54

ace-SePh-SiMe2 nitrilium ion 10c opt

|    |             |             |             |
|----|-------------|-------------|-------------|
| Se | -2.32020300 | -1.18708800 | -1.38060800 |
| C  | -0.27349700 | 0.83841400  | 0.04477400  |
| C  | 0.54663800  | 1.66022000  | 0.80037700  |
| C  | 0.17834000  | 2.94751200  | 1.25975800  |
| C  | -1.05188000 | 3.43939300  | 0.92600900  |
| C  | -1.91481100 | 2.62193400  | 0.17506200  |
| C  | -3.15594100 | 3.24119700  | -0.06234600 |
| C  | -4.12224100 | 2.55381100  | -0.74619400 |
| C  | -3.84168400 | 1.23429100  | -1.16625900 |
| C  | -2.62523400 | 0.63881400  | -0.92398500 |
| C  | -1.58261400 | 1.32949100  | -0.25373300 |
| C  | -2.99505700 | -2.05628800 | 0.20267100  |
| C  | -3.62476800 | -2.08984800 | 2.51027800  |
| C  | -3.18684300 | -1.38102400 | 1.39912700  |
| H  | -4.61257300 | 0.67110300  | -1.67723700 |
| H  | -1.17659900 | 5.58937800  | 0.83143800  |
| H  | -3.78214600 | -1.56900000 | 3.44570600  |
| H  | -3.00497500 | -0.31623200 | 1.47093500  |
| C  | -3.23784400 | -3.42040500 | 0.10329400  |
| C  | -3.66885100 | -4.11822300 | 1.22241800  |
| C  | -3.86160100 | -3.45485900 | 2.42621500  |
| H  | -4.20334200 | -3.99981800 | 3.29605600  |
| H  | 1.53831900  | 1.32220400  | 1.06868700  |
| H  | 0.87932100  | 3.51977800  | 1.85398100  |
| C  | -1.74505500 | 4.74619400  | 1.22541600  |
| C  | -3.14051200 | 4.62261200  | 0.54789100  |
| H  | -5.09313300 | 2.98468200  | -0.95379600 |
| H  | -1.83272300 | 4.89992600  | 2.30167900  |
| H  | -3.28341600 | 5.38468500  | -0.21909000 |
| H  | -3.95131900 | 4.74211600  | 1.26695100  |
| H  | -3.10237700 | -3.93598900 | -0.84003100 |
| H  | -3.86376000 | -5.17992400 | 1.14767600  |
| Si | 0.32082200  | -0.77863900 | -0.70851500 |
| C  | 0.28283800  | -2.39698000 | 0.22264400  |
| H  | -0.39057400 | -2.32803400 | 1.07820900  |
| H  | -0.09336800 | -3.18983900 | -0.42570300 |
| H  | 1.26785300  | -2.69075100 | 0.58207800  |
| C  | 0.63068600  | -0.76889400 | -2.55400800 |
| H  | -0.05185800 | -0.07310000 | -3.04448400 |
| H  | 1.64810000  | -0.47046700 | -2.80332400 |
| H  | 0.45081500  | -1.76136000 | -2.97026600 |
| N  | 2.24778500  | -0.46974900 | -0.28688400 |
| C  | 3.38391600  | -0.40244100 | -0.15689000 |
| C  | 4.79215000  | -0.30080700 | 0.00299900  |
| C  | 5.44044100  | -1.10237300 | 0.94780200  |
| C  | 5.50338000  | 0.60471700  | -0.79115200 |
| C  | 6.80702800  | -0.99669800 | 1.09984800  |
| H  | 4.87429100  | -1.79724600 | 1.55318600  |
| C  | 6.86988500  | 0.70972600  | -0.63865500 |

|                                       |             |             |             |
|---------------------------------------|-------------|-------------|-------------|
| H                                     | 4.98491100  | 1.21571600  | -1.51758900 |
| C                                     | 7.49486700  | -0.09225500 | 0.30435200  |
| H                                     | 7.34922200  | -1.59574100 | 1.81795200  |
| H                                     | 7.45933200  | 1.39496300  | -1.23155200 |
| F                                     | 8.80449800  | 0.00997400  | 0.45226000  |
| 50                                    |             |             |             |
| naph-SePh-SiMe2 nitrilium ion 11c opt |             |             |             |
| Se                                    | -2.48860400 | -0.56238100 | -1.38466400 |
| C                                     | -0.37383900 | 1.05487900  | 0.30839900  |
| C                                     | 0.49059900  | 1.59259100  | 1.23600800  |
| C                                     | 0.23252300  | 2.81236600  | 1.89465400  |
| C                                     | -0.88858500 | 3.52512800  | 1.59200000  |
| C                                     | -1.83362100 | 3.01548500  | 0.67047700  |
| C                                     | -3.01951600 | 3.73161600  | 0.38038200  |
| C                                     | -3.96883200 | 3.21863000  | -0.45591400 |
| C                                     | -3.78722700 | 1.93858200  | -1.01441100 |
| C                                     | -2.64307800 | 1.23400600  | -0.75388300 |
| C                                     | -1.59897700 | 1.75350900  | 0.05933000  |
| C                                     | -3.26332700 | -1.51422500 | 0.10366400  |
| C                                     | -3.90251500 | -1.72297900 | 2.39871800  |
| C                                     | -3.38066600 | -0.95346900 | 1.36721400  |
| H                                     | -4.56256800 | 1.50482100  | -1.63243000 |
| H                                     | -4.00392900 | -1.29027400 | 3.38544100  |
| H                                     | -3.07969600 | 0.06923200  | 1.55399000  |
| C                                     | -3.66042200 | -2.82232200 | -0.14107800 |
| C                                     | -4.17442800 | -3.58212500 | 0.90016000  |
| C                                     | -4.29494300 | -3.03416500 | 2.16983200  |
| H                                     | -4.70219500 | -3.62639500 | 2.97832600  |
| H                                     | 1.41309900  | 1.08478600  | 1.48027600  |
| H                                     | 0.94169900  | 3.18665000  | 2.62090600  |
| H                                     | -4.87192300 | 3.77252300  | -0.67293100 |
| H                                     | -3.58019100 | -3.24623000 | -1.13493900 |
| H                                     | -4.48925300 | -4.60036500 | 0.71330200  |
| Si                                    | 0.09968800  | -0.46041200 | -0.71343600 |
| C                                     | -0.00730400 | -2.19031900 | -0.01942400 |
| H                                     | -0.67975200 | -2.20780400 | 0.83980300  |
| H                                     | -0.41527500 | -2.87146400 | -0.76819100 |
| H                                     | 0.96244600  | -2.57183500 | 0.29557000  |
| C                                     | 0.41822300  | -0.17639300 | -2.53667700 |
| H                                     | -0.19439500 | 0.65121000  | -2.89920500 |
| H                                     | 1.45941700  | 0.05935800  | -2.75038800 |
| H                                     | 0.14283400  | -1.06597400 | -3.10539900 |
| N                                     | 2.06620800  | -0.31999000 | -0.28328200 |
| C                                     | 3.20693700  | -0.32591200 | -0.17754900 |
| C                                     | 4.62131900  | -0.32303200 | -0.03736800 |
| C                                     | 5.25247200  | -1.41082200 | 0.57454000  |
| C                                     | 5.35514700  | 0.76848900  | -0.51262700 |
| C                                     | 6.62463500  | -1.40643700 | 0.71279700  |
| H                                     | 4.66915300  | -2.24742400 | 0.93471800  |
| C                                     | 6.72745800  | 0.77239000  | -0.37385200 |
| H                                     | 4.85028900  | 1.60059000  | -0.98444900 |



|   |             |             |             |
|---|-------------|-------------|-------------|
| C | 7.33502300  | -0.31481500 | 0.23641100  |
| H | 7.15324300  | -2.22524800 | 1.18045900  |
| H | 7.33416800  | 1.59526800  | -0.72508900 |
| F | 8.65015100  | -0.30982700 | 0.37107300  |
| H | -3.16410600 | 4.69887000  | 0.84624500  |
| H | -1.08331500 | 4.48087700  | 2.06316100  |

63

ace-TeMes-SiMe2 nitrilium ion 10d opt

|    |             |             |             |
|----|-------------|-------------|-------------|
| C  | -3.05872700 | 2.22880900  | -0.89853000 |
| C  | -1.92272400 | 1.45917800  | -0.78499900 |
| C  | -0.73133600 | 1.98389800  | -0.21123900 |
| C  | -0.83708500 | 3.30849300  | 0.24517800  |
| C  | -1.99884200 | 4.09797200  | 0.13909800  |
| C  | -3.11690300 | 3.56261400  | -0.43755100 |
| H  | -3.94758700 | 1.79782300  | -1.34268100 |
| C  | 0.52128900  | 1.31362900  | -0.00494700 |
| C  | 0.19730500  | 3.99854800  | 0.90494200  |
| H  | -4.03576800 | 4.12529800  | -0.54077900 |
| C  | 1.37503200  | 3.34566000  | 1.12734500  |
| C  | 1.51076200  | 2.01734800  | 0.66394000  |
| H  | 2.20143000  | 3.81666600  | 1.64424300  |
| H  | 2.46199800  | 1.54393300  | 0.86057700  |
| C  | -0.27459500 | 5.38627500  | 1.26324000  |
| H  | 0.35934400  | 6.14428800  | 0.80176900  |
| H  | -0.22345300 | 5.54552500  | 2.34099500  |
| C  | -1.73571500 | 5.45753200  | 0.73972300  |
| H  | -2.44338000 | 5.67403200  | 1.54052800  |
| H  | -1.85756400 | 6.24019900  | -0.00995300 |
| Te | -1.94993800 | -0.53655400 | -1.43194000 |
| C  | -3.10562500 | -1.49778900 | 0.07617200  |
| C  | -3.01546100 | -1.18135800 | 1.43648800  |
| C  | -3.97095300 | -2.50692000 | -0.37773500 |
| C  | -3.82478000 | -1.88294100 | 2.32746100  |
| C  | -4.74891000 | -3.17767100 | 0.55677800  |
| C  | -4.69810700 | -2.87695100 | 1.91285300  |
| H  | -3.76162400 | -1.64112900 | 3.38259900  |
| H  | -5.41550200 | -3.96078700 | 0.21294900  |
| Si | 0.86280100  | -0.42482300 | -0.64899400 |
| C  | 1.19784000  | -0.60134900 | -2.48458400 |
| H  | 0.58736800  | 0.09933300  | -3.05554500 |
| H  | 2.24181700  | -0.40482000 | -2.72687500 |
| H  | 0.94746000  | -1.60932700 | -2.81951200 |
| C  | 0.70474000  | -1.92875900 | 0.45453100  |
| H  | -0.32513900 | -2.23903400 | 0.62098800  |
| H  | 1.24655500  | -2.76155700 | -0.00039200 |
| H  | 1.16028800  | -1.72089700 | 1.42487300  |
| C  | -2.10666500 | -0.12053600 | 1.99016800  |
| H  | -1.11103800 | -0.16567500 | 1.54939700  |
| H  | -2.49890200 | 0.88036500  | 1.79735600  |
| H  | -2.00399200 | -0.23939300 | 3.06737600  |
| C  | -4.08619300 | -2.89843500 | -1.82807300 |

|   |             |             |             |
|---|-------------|-------------|-------------|
| H | -4.39588000 | -2.05430400 | -2.44674600 |
| H | -3.13716900 | -3.26538500 | -2.22639600 |
| H | -4.82009000 | -3.69240000 | -1.94800700 |
| C | -5.57861100 | -3.59932400 | 2.89141400  |
| H | -6.59551000 | -3.20355400 | 2.85086700  |
| H | -5.63195400 | -4.66307200 | 2.66019600  |
| H | -5.21526000 | -3.48417900 | 3.91126000  |
| N | 2.84139700  | -0.42071900 | -0.24557600 |
| C | 3.96164300  | -0.61179400 | -0.10116400 |
| C | 5.35276800  | -0.83781700 | 0.08453400  |
| C | 6.27211300  | -0.16155300 | -0.72338200 |
| C | 5.77571600  | -1.73287900 | 1.07224900  |
| C | 7.62172500  | -0.38147800 | -0.54235800 |
| H | 5.92623900  | 0.52745300  | -1.48203000 |
| C | 7.12529600  | -1.95293100 | 1.25241700  |
| H | 5.05020200  | -2.24750700 | 1.68756300  |
| C | 8.02170200  | -1.27275400 | 0.44184600  |
| H | 8.36728600  | 0.11966700  | -1.14355100 |
| H | 7.49703200  | -2.63679500 | 2.00252500  |
| F | 9.31559700  | -1.48352300 | 0.61526400  |

43

ace 5-Br 6-SiMe2 nitrilium ion 10e opt

|    |             |             |             |
|----|-------------|-------------|-------------|
| C  | 4.67846500  | -0.48655400 | 0.02650200  |
| C  | 3.32398300  | -0.69954100 | 0.00999700  |
| C  | 2.37983900  | 0.35781800  | -0.00253200 |
| C  | 2.97418500  | 1.63449200  | -0.00039600 |
| C  | 4.36130100  | 1.87776100  | 0.01649200  |
| C  | 5.22039500  | 0.81590400  | 0.03103400  |
| H  | 5.34531300  | -1.33803500 | 0.03511000  |
| C  | 0.94370500  | 0.30097300  | -0.01785800 |
| C  | 2.24323200  | 2.83831200  | -0.01707800 |
| H  | 6.29472800  | 0.94397400  | 0.04435000  |
| C  | 0.88073600  | 2.77795800  | -0.03581700 |
| C  | 0.26272600  | 1.50810100  | -0.03464100 |
| H  | 0.26798400  | 3.66992500  | -0.05043300 |
| H  | -0.81836900 | 1.51090300  | -0.04782900 |
| C  | 3.19698700  | 4.00636400  | -0.01207700 |
| H  | 3.04974800  | 4.62811800  | -0.89578400 |
| H  | 3.02306800  | 4.64392300  | 0.85531600  |
| C  | 4.61172700  | 3.36624400  | 0.01451900  |
| H  | 5.17347300  | 3.66677300  | 0.89931200  |
| H  | 5.20415100  | 3.66034500  | -0.85215900 |
| Si | -0.04349300 | -1.28445500 | -0.00750400 |
| Br | 2.72790500  | -2.50585900 | -0.00252100 |
| C  | -0.15840900 | -2.21385100 | 1.60246800  |
| H  | -1.07929900 | -1.98102500 | 2.13693900  |
| H  | -0.12591400 | -3.28966900 | 1.42684300  |
| H  | 0.68206600  | -1.95391400 | 2.24460600  |
| C  | -0.16762500 | -2.23528000 | -1.60403800 |
| H  | -0.14423900 | -3.30879300 | -1.41317000 |
| H  | -1.08712300 | -2.00225700 | -2.14082700 |

|   |             |             |             |
|---|-------------|-------------|-------------|
| H | 0.67423000  | -1.99144900 | -2.25056400 |
| N | -1.81345000 | -0.59455800 | -0.00630000 |
| C | -2.92833900 | -0.32813800 | -0.00260800 |
| C | -4.30310800 | 0.00911400  | 0.00201500  |
| C | -4.97469000 | 0.16362100  | -1.21728900 |
| C | -4.96324900 | 0.17637200  | 1.22586800  |
| C | -6.31407800 | 0.48713700  | -1.21124600 |
| H | -4.44745900 | 0.03030800  | -2.15208500 |
| C | -6.30266500 | 0.49982000  | 1.22897800  |
| H | -4.42727400 | 0.05282200  | 2.15703400  |
| C | -6.95187500 | 0.64854600  | 0.01105900  |
| H | -6.87405100 | 0.61610200  | -2.12673900 |
| H | -6.85407300 | 0.63828200  | 2.14827100  |
| F | -8.23445100 | 0.95799700  | 0.01545200  |

43

ace 5-l 6-SiMe2 nitrilium ion 10f opt

|    |             |             |             |
|----|-------------|-------------|-------------|
| C  | 4.34610800  | 0.33629500  | 0.64054000  |
| C  | 3.10961400  | -0.13450100 | 0.26747700  |
| C  | 2.03822200  | 0.73898800  | -0.06352600 |
| C  | 2.40378700  | 2.10094500  | -0.06356200 |
| C  | 3.66669100  | 2.59703700  | 0.31433700  |
| C  | 4.63763900  | 1.71507400  | 0.69323900  |
| H  | 5.13111000  | -0.36896900 | 0.87765000  |
| C  | 0.67754500  | 0.43807500  | -0.42031900 |
| C  | 1.55594500  | 3.14336300  | -0.48915000 |
| H  | 5.62528700  | 2.03869600  | 0.99452300  |
| C  | 0.30143300  | 2.83463500  | -0.92661000 |
| C  | -0.11522500 | 1.48804500  | -0.85915600 |
| H  | -0.37985900 | 3.58968200  | -1.29665300 |
| H  | -1.13318700 | 1.29116800  | -1.16988600 |
| C  | 2.28648100  | 4.45899000  | -0.39519200 |
| H  | 2.37530900  | 4.91446100  | -1.38238200 |
| H  | 1.74299100  | 5.16645200  | 0.23141800  |
| C  | 3.67632200  | 4.10115000  | 0.19597800  |
| H  | 3.82501700  | 4.56128800  | 1.17365600  |
| H  | 4.49127000  | 4.44229200  | -0.44218700 |
| Si | -0.17734600 | -1.19972300 | -0.15254300 |
| C  | -0.11340800 | -1.90449600 | 1.57034300  |
| H  | -1.06073100 | -1.75954800 | 2.09017900  |
| H  | 0.10343000  | -2.97201000 | 1.54040600  |
| H  | 0.67233800  | -1.42047300 | 2.14989000  |
| C  | -0.39822700 | -2.35436800 | -1.58845900 |
| H  | -1.07039100 | -3.17142800 | -1.31938300 |
| H  | -0.83141100 | -1.81087800 | -2.43032300 |
| H  | 0.54855300  | -2.77734600 | -1.91500700 |
| N  | -1.99047100 | -0.63423100 | -0.10766100 |
| C  | -3.11271100 | -0.41485000 | -0.03073200 |
| C  | -4.49661200 | -0.13206200 | 0.06546500  |
| C  | -5.36350800 | -0.59692300 | -0.93129800 |
| C  | -4.96854700 | 0.60581400  | 1.15825500  |
| C  | -6.71014800 | -0.32162900 | -0.83342500 |

|   |             |             |             |
|---|-------------|-------------|-------------|
| H | -4.97987200 | -1.16596300 | -1.76711900 |
| C | -6.31567600 | 0.87978900  | 1.25349000  |
| H | -4.28268100 | 0.95581700  | 1.91763200  |
| C | -7.15993800 | 0.41093900  | 0.25648000  |
| H | -7.41722000 | -0.65962300 | -1.57782800 |
| H | -6.72601400 | 1.44511000  | 2.07831900  |
| F | -8.44974100 | 0.67378000  | 0.34892100  |
| I | 2.94632400  | -2.20884700 | 0.02096200  |

39

naph 1-Br 8-SiMe2 nitrilium ion 11e opt

|    |             |             |             |
|----|-------------|-------------|-------------|
| C  | 4.86961900  | 0.29245500  | 0.48011400  |
| C  | 3.57872200  | -0.03076700 | 0.17772000  |
| C  | 2.56737400  | 0.93133800  | -0.07788300 |
| C  | 3.00736500  | 2.28743100  | -0.08259200 |
| C  | 4.34555900  | 2.61549100  | 0.23748700  |
| C  | 5.25553200  | 1.64428800  | 0.53157100  |
| H  | 5.59640400  | -0.48750600 | 0.65900300  |
| C  | 1.18591800  | 0.63827500  | -0.34199500 |
| C  | 2.10074500  | 3.31444900  | -0.43715500 |
| H  | 6.27814700  | 1.89544500  | 0.77695300  |
| C  | 0.81597100  | 3.02031500  | -0.77356900 |
| C  | 0.36647900  | 1.68730500  | -0.70191900 |
| H  | 0.12912200  | 3.80085600  | -1.07123500 |
| H  | -0.67405200 | 1.51225200  | -0.93650400 |
| Si | 0.39289500  | -1.04006700 | -0.06673000 |
| Br | 3.18132600  | -1.88252900 | -0.00790900 |
| C  | 0.41647000  | -1.67574700 | 1.68532300  |
| H  | -0.52617500 | -1.48435900 | 2.19717600  |
| H  | 0.60371800  | -2.74980600 | 1.69871200  |
| H  | 1.21405800  | -1.19181200 | 2.24881200  |
| C  | 0.27601200  | -2.25096400 | -1.47742000 |
| H  | 0.51754800  | -3.25692300 | -1.13216800 |
| H  | -0.72191900 | -2.27262400 | -1.91412600 |
| H  | 0.98643500  | -1.98512500 | -2.25936300 |
| N  | -1.44373200 | -0.51739300 | -0.07524200 |
| C  | -2.57493600 | -0.33973700 | -0.02167100 |
| C  | -3.97030900 | -0.10882400 | 0.04370100  |
| C  | -4.77947100 | -0.48353600 | -1.03620400 |
| C  | -4.51159700 | 0.48847700  | 1.18905200  |
| C  | -6.13734500 | -0.25924700 | -0.96918700 |
| H  | -4.34303400 | -0.94377200 | -1.91216800 |
| C  | -5.86982200 | 0.71172900  | 1.25345000  |
| H  | -3.87008500 | 0.77095000  | 2.01261200  |
| C  | -6.65601000 | 0.33365600  | 0.17379200  |
| H  | -6.80130800 | -0.53158200 | -1.77745500 |
| H  | -6.33256600 | 1.16942400  | 2.11642800  |
| F  | -7.95636200 | 0.54800700  | 0.23667000  |
| H  | 2.45886800  | 4.33638800  | -0.44956900 |
| H  | 4.63360600  | 3.65899200  | 0.23489900  |

30

ace-H-SiMe2 cation 5 opt

|    |             |             |             |
|----|-------------|-------------|-------------|
| C  | 2.48188200  | 2.01801800  | -0.04713600 |
| C  | 2.54661800  | 0.65121400  | 0.01715200  |
| C  | 1.34574000  | -0.08076700 | -0.00695400 |
| C  | 0.06947500  | 0.49837400  | -0.08779100 |
| C  | 1.21334200  | 2.62492200  | -0.14632100 |
| H  | 3.37231500  | 2.63265700  | -0.03419200 |
| C  | 1.58207300  | -1.46578500 | 0.03945600  |
| C  | -1.03851100 | -0.42682100 | -0.09928300 |
| H  | 1.16040900  | 3.70403500  | -0.21408300 |
| C  | -0.76964000 | -1.80802500 | -0.06967800 |
| C  | 0.51810400  | -2.34235500 | 0.00175900  |
| H  | -1.59720100 | -2.50756000 | -0.08779600 |
| H  | 0.65942500  | -3.41429400 | 0.02782600  |
| C  | 3.06250500  | -1.71418200 | 0.11319900  |
| H  | 3.30956600  | -2.27780400 | 1.01449700  |
| H  | 3.38797200  | -2.32283500 | -0.73216800 |
| C  | 3.71122200  | -0.30372000 | 0.10478500  |
| H  | 4.29570800  | -0.12445300 | 1.00754400  |
| H  | 4.38692400  | -0.17578800 | -0.74107200 |
| C  | -4.06977100 | -1.25868800 | -0.14699700 |
| H  | -4.44097800 | -1.51619200 | 0.85006100  |
| H  | -4.91168100 | -0.83324300 | -0.69759400 |
| H  | -3.74290400 | -2.16927300 | -0.64328500 |
| Si | -2.75970600 | 0.01665500  | 0.01138600  |
| C  | -3.34704700 | 1.72097300  | 0.35389400  |
| H  | -4.38436200 | 1.70468000  | 0.68833400  |
| H  | -2.72670100 | 2.20781300  | 1.10769900  |
| H  | -3.29612600 | 2.32356500  | -0.55826900 |
| C  | 0.03740900  | 1.90334900  | -0.17076600 |
| H  | -0.89689700 | 2.43649400  | -0.27881600 |

41

ace-OPh-SiMe2 cation 2a opt

|   |             |             |             |
|---|-------------|-------------|-------------|
| C | -1.46111800 | -2.64460600 | 0.00004800  |
| C | -2.60012500 | -1.88190800 | 0.00007300  |
| C | -2.46426900 | -0.48353500 | 0.00004400  |
| C | -1.24192600 | 0.15859000  | 0.00000000  |
| C | -0.11408200 | -0.66345800 | -0.00001100 |
| C | -0.17224900 | -2.02062700 | -0.00000500 |
| H | -1.50061200 | -3.72575000 | 0.00007000  |
| C | -3.67104700 | 0.22226700  | -0.00007800 |
| C | -1.15548700 | 1.56911000  | -0.00005000 |
| H | 0.72570400  | -2.62460700 | -0.00002400 |
| C | -2.35470000 | 2.25929500  | -0.00007200 |
| C | -3.61199000 | 1.59772800  | -0.00009600 |
| H | -2.35990300 | 3.34258400  | -0.00009800 |
| H | -4.51250500 | 2.19845400  | -0.00019100 |
| C | -4.79312800 | -0.79344700 | -0.00036300 |
| H | -5.43183000 | -0.66897300 | 0.87474100  |
| H | -5.43076600 | -0.66931000 | -0.87630900 |
| C | -4.08403000 | -2.18969900 | 0.00018900  |
| H | -4.36194500 | -2.77577300 | 0.87636500  |

|    |             |             |             |
|----|-------------|-------------|-------------|
| H  | -4.36203300 | -2.77654900 | -0.87543700 |
| O  | 1.05588600  | 0.16116900  | -0.00010000 |
| C  | 1.41235900  | 2.59995800  | 1.55186300  |
| H  | 2.49617200  | 2.46975300  | 1.53987300  |
| H  | 1.20964800  | 3.66963900  | 1.64637200  |
| H  | 0.99852100  | 2.10319700  | 2.42970600  |
| C  | 2.35779300  | -0.40828400 | -0.00007500 |
| C  | 2.95328400  | -0.66800600 | -1.21714800 |
| C  | 2.95309600  | -0.66833400 | 1.21701700  |
| C  | 4.22925500  | -1.21473500 | -1.20653800 |
| H  | 2.43091300  | -0.45291900 | -2.14050100 |
| C  | 4.22905400  | -1.21508100 | 1.20647400  |
| H  | 2.43059800  | -0.45343200 | 2.14034400  |
| C  | 4.86212300  | -1.48496200 | -0.00002300 |
| H  | 4.72630900  | -1.42911000 | -2.14279400 |
| H  | 4.72595800  | -1.42973000 | 2.14274400  |
| H  | 5.85673400  | -1.91017400 | -0.00000300 |
| C  | 1.41294800  | 2.60008900  | -1.55138100 |
| H  | 1.21090500  | 3.66990000  | -1.64572000 |
| H  | 2.49668200  | 2.46922100  | -1.53910200 |
| H  | 0.99907600  | 2.10371900  | -2.42943200 |
| Si | 0.64933700  | 1.96988400  | 0.00007100  |

37

naph-OPh-SiMe<sub>2</sub> cation 9a opt

|    |             |             |             |
|----|-------------|-------------|-------------|
| C  | -1.69308200 | 0.35497200  | -0.01934000 |
| C  | -2.80070600 | 1.22153800  | -0.00188600 |
| C  | -1.81499000 | -1.05652800 | 0.03855200  |
| C  | -0.41006800 | 0.91608800  | -0.09899600 |
| C  | -4.07866300 | 0.62199600  | 0.08126200  |
| C  | -2.55680100 | 2.61864200  | -0.06652000 |
| C  | -4.20763800 | -0.74191200 | 0.13931400  |
| C  | -1.28160400 | 3.10406500  | -0.14408500 |
| C  | -3.07838600 | -1.59026000 | 0.11736900  |
| C  | -0.15214500 | 2.24141600  | -0.16293800 |
| H  | -4.95760900 | 1.25449100  | 0.09836700  |
| H  | -3.39772500 | 3.30007600  | -0.05391600 |
| H  | -5.19327300 | -1.18323100 | 0.20422300  |
| H  | -1.11125800 | 4.17065400  | -0.19350700 |
| H  | -3.23197100 | -2.66143400 | 0.16433500  |
| H  | 0.85379900  | 2.63318300  | -0.22580600 |
| C  | 0.41075400  | -2.63199400 | -1.56726400 |
| H  | 0.09935300  | -2.06912400 | -2.44768000 |
| H  | 1.49381800  | -2.76684900 | -1.58776500 |
| C  | 0.56223900  | -2.51965100 | 1.53282600  |
| H  | 0.14876800  | -3.52087300 | 1.67846800  |
| H  | 0.29895600  | -1.92027400 | 2.40470800  |
| H  | -0.04520000 | -3.62347300 | -1.62572400 |
| H  | 1.64811500  | -2.61637400 | 1.47548400  |
| Si | -0.12486600 | -1.80137500 | -0.01579100 |
| C  | 1.96888400  | 0.19879600  | -0.03090200 |
| C  | 2.70147800  | 0.20369000  | -1.19886500 |

|   |            |             |             |
|---|------------|-------------|-------------|
| C | 2.50133000 | 0.46414200  | 1.21383600  |
| C | 4.05928700 | 0.48198500  | -1.10473800 |
| H | 2.22303400 | 0.00117700  | -2.14837100 |
| C | 3.85884400 | 0.74261800  | 1.28606900  |
| H | 1.87169300 | 0.45763400  | 2.09448600  |
| C | 4.63225500 | 0.74880100  | 0.13129100  |
| H | 4.66525700 | 0.49194800  | -2.00042000 |
| H | 4.31082200 | 0.95277400  | 2.24588100  |
| H | 5.69001100 | 0.96542200  | 0.19601200  |
| O | 0.58195100 | -0.11461300 | -0.11595100 |

41

ace-SPh-SiMe2 cation 2b opt

|   |             |             |             |
|---|-------------|-------------|-------------|
| C | -2.08807500 | -2.19992000 | -1.41619300 |
| C | -2.90039600 | -1.51355800 | -0.54711900 |
| C | -2.42455200 | -0.32354100 | 0.02710600  |
| C | -1.16559500 | 0.21115200  | -0.23224000 |
| C | -0.35119600 | -0.53024900 | -1.11881900 |
| C | -0.79640300 | -1.69414200 | -1.70074900 |
| H | -2.40660200 | -3.11953900 | -1.88909800 |
| C | -3.34145300 | 0.27601500  | 0.90458900  |
| C | -0.79423300 | 1.42424900  | 0.39891600  |
| H | -0.15190100 | -2.24074100 | -2.37828600 |
| C | -1.70504200 | 2.00636000  | 1.26179800  |
| C | -2.97837700 | 1.44196800  | 1.52934600  |
| H | -1.45601900 | 2.93630600  | 1.76079400  |
| H | -3.64314200 | 1.94634100  | 2.21875300  |
| C | -4.58492300 | -0.58134500 | 0.94950700  |
| H | -4.77208900 | -0.93796500 | 1.96304600  |
| H | -5.46418400 | -0.01142800 | 0.64815100  |
| C | -4.29812300 | -1.76221500 | -0.02906800 |
| H | -4.36308300 | -2.72826000 | 0.47255800  |
| H | -5.01442700 | -1.78548700 | -0.85117300 |
| C | 2.21621100  | 2.26778500  | 1.02199200  |
| H | 3.17403700  | 2.40842900  | 0.51886200  |
| H | 2.02078600  | 3.16340100  | 1.61835300  |
| H | 2.28894300  | 1.41545000  | 1.69690500  |
| C | 2.32631700  | -0.75879600 | -0.24264100 |
| C | 3.68496900  | -0.74929900 | -0.52546200 |
| C | 1.81582400  | -1.37948000 | 0.88792700  |
| C | 4.55538400  | -1.37205700 | 0.35842000  |
| H | 4.05909300  | -0.27470500 | -1.42434900 |
| C | 2.69860200  | -2.00541600 | 1.75536200  |
| H | 0.75184000  | -1.38120800 | 1.08764400  |
| C | 4.06337600  | -1.99783700 | 1.49481800  |
| H | 5.61654700  | -1.37614300 | 0.14874400  |
| H | 2.31672300  | -2.49922400 | 2.63892100  |
| H | 4.74466600  | -2.48775800 | 2.17759000  |
| C | 0.73670100  | 3.39005400  | -1.48279100 |
| H | 0.40601600  | 4.32104300  | -1.01524600 |
| H | 1.70579600  | 3.57282500  | -1.94867000 |
| H | 0.01274000  | 3.13124000  | -2.25610300 |

|                               |             |             |             |
|-------------------------------|-------------|-------------|-------------|
| Si                            | 0.84043200  | 2.06979500  | -0.19367700 |
| S                             | 1.27463300  | 0.12949400  | -1.39025800 |
| 41                            |             |             |             |
| ace-SePh-SiMe2 cation 2c opt  |             |             |             |
| Se                            | -1.25152400 | 0.15035900  | -1.36743800 |
| C                             | 0.92970900  | 1.38311600  | 0.51683300  |
| C                             | 1.83688600  | 1.94741500  | 1.39580800  |
| C                             | 3.11676800  | 1.39194300  | 1.64426300  |
| C                             | 3.48870800  | 0.25007000  | 0.98321900  |
| C                             | 2.57676200  | -0.33334300 | 0.08826800  |
| C                             | 3.07341900  | -1.49832600 | -0.52099400 |
| C                             | 2.27521100  | -2.17425800 | -1.40888100 |
| C                             | 0.97622500  | -1.67967300 | -1.68066100 |
| C                             | 0.51324100  | -0.53934400 | -1.06954100 |
| C                             | 1.30837300  | 0.19345500  | -0.15699900 |
| C                             | -2.28359300 | -0.82475300 | -0.05096200 |
| C                             | -2.48264800 | -2.10692700 | 1.94794100  |
| C                             | -1.67617500 | -1.46906500 | 1.01526600  |
| H                             | 0.34462900  | -2.21717600 | -2.37707600 |
| H                             | 4.92689700  | -0.98275900 | 2.00609800  |
| H                             | -2.02525900 | -2.61879500 | 2.78424300  |
| H                             | -0.59864900 | -1.48199900 | 1.12084700  |
| C                             | -3.66104300 | -0.80226100 | -0.21108400 |
| C                             | -4.45255500 | -1.44015000 | 0.73447300  |
| C                             | -3.86465900 | -2.08945500 | 1.81087600  |
| H                             | -4.48481500 | -2.58993000 | 2.54242400  |
| H                             | 1.57689900  | 2.85810200  | 1.92469600  |
| H                             | 3.77803300  | 1.88167400  | 2.34740500  |
| C                             | 4.74291400  | -0.59168200 | 1.00467800  |
| C                             | 4.47713000  | -1.73888700 | -0.01692100 |
| H                             | 2.60916600  | -3.07475500 | -1.90730800 |
| H                             | 5.61688900  | -0.00027800 | 0.73088200  |
| H                             | 4.56604700  | -2.72257900 | 0.44479000  |
| H                             | 5.18934600  | -1.71252100 | -0.84256900 |
| H                             | -4.11715500 | -0.30746500 | -1.05984300 |
| H                             | -5.52829300 | -1.43526200 | 0.62059200  |
| Si                            | -0.71330700 | 2.09062400  | 0.02292500  |
| C                             | -0.62844600 | 3.52839400  | -1.13839900 |
| H                             | 0.08055600  | 3.34883200  | -1.94670600 |
| H                             | -1.60566900 | 3.75908400  | -1.56424200 |
| H                             | -0.28782700 | 4.40784700  | -0.58521400 |
| C                             | -2.03325700 | 2.21488800  | 1.31067500  |
| H                             | -2.08969400 | 1.31635200  | 1.92449700  |
| H                             | -1.80143900 | 3.06280600  | 1.96131500  |
| H                             | -3.00935700 | 2.40094600  | 0.85995700  |
| 37                            |             |             |             |
| naph-SePh-SiMe2 cation 9c opt |             |             |             |
| C                             | 1.71099100  | -0.29463800 | 0.01512400  |
| C                             | 2.84044900  | -1.06208700 | 0.39537700  |
| C                             | 1.50555000  | 1.00007100  | 0.56733100  |
| C                             | 0.81250200  | -0.87556900 | -0.91741700 |



|    |             |             |             |
|----|-------------|-------------|-------------|
| C  | 3.73794000  | -0.51819700 | 1.34580300  |
| C  | 3.03441300  | -2.34266400 | -0.17742700 |
| C  | 3.52158300  | 0.71733600  | 1.88723700  |
| C  | 2.15056100  | -2.85367100 | -1.08625600 |
| C  | 2.40294900  | 1.48104000  | 1.49150700  |
| C  | 1.01312800  | -2.11072100 | -1.46598700 |
| H  | 4.60157100  | -1.10268400 | 1.63863100  |
| H  | 3.90475000  | -2.91590400 | 0.11790800  |
| H  | 4.21172600  | 1.12139100  | 2.61555600  |
| H  | 2.31113800  | -3.83129200 | -1.51972600 |
| H  | 2.26995500  | 2.46540000  | 1.92753600  |
| H  | 0.31103400  | -2.52438400 | -2.17842300 |
| C  | 0.59964100  | 3.27845700  | -1.35729600 |
| H  | 1.27986000  | 2.86239200  | -2.10083300 |
| H  | -0.26657800 | 3.70492700  | -1.86453300 |
| C  | -1.20925700 | 2.55046800  | 1.07740200  |
| H  | -0.79477100 | 3.33692000  | 1.71438000  |
| H  | -1.54182200 | 1.73338300  | 1.71682500  |
| H  | 1.12224300  | 4.09115200  | -0.84575000 |
| H  | -2.06953200 | 2.96994800  | 0.55384600  |
| Si | 0.10045600  | 2.01054700  | -0.10750400 |
| C  | -2.02981500 | -0.52146700 | -0.07070200 |
| C  | -3.36767100 | -0.27889500 | -0.34473200 |
| C  | -1.61760600 | -1.15711100 | 1.09011300  |
| C  | -4.32041000 | -0.68050100 | 0.58180000  |
| H  | -3.67128500 | 0.20450000  | -1.26522500 |
| C  | -2.58454000 | -1.55649900 | 2.00242900  |
| H  | -0.56931700 | -1.34619800 | 1.28453600  |
| C  | -3.92942600 | -1.31610200 | 1.75168200  |
| H  | -5.36832100 | -0.50281100 | 0.38048800  |
| H  | -2.28237900 | -2.05958200 | 2.91140200  |
| H  | -4.67541100 | -1.63335000 | 2.46814900  |
| Se | -0.75897500 | 0.13303100  | -1.37546000 |

50

ace-TeMes-SiMe2 cation 2d opt

|   |             |             |             |
|---|-------------|-------------|-------------|
| C | -1.30782600 | -1.50131800 | -1.83700400 |
| C | -1.04655400 | -0.41494000 | -1.03625000 |
| C | -1.98914100 | 0.04184200  | -0.07816500 |
| C | -3.17059400 | -0.70080300 | -0.00130600 |
| C | -3.44886500 | -1.82356700 | -0.80236400 |
| C | -2.51853400 | -2.22800400 | -1.72338000 |
| H | -0.57816000 | -1.82523900 | -2.56907600 |
| C | -1.84131000 | 1.14323600  | 0.80960400  |
| C | -4.21007900 | -0.40936700 | 0.90009100  |
| H | -2.68420900 | -3.08194200 | -2.36696100 |
| C | -4.06234500 | 0.65233000  | 1.75243100  |
| C | -2.87142900 | 1.41598900  | 1.69214700  |
| H | -4.82933100 | 0.91963200  | 2.46761600  |
| H | -2.78050100 | 2.25240500  | 2.37785300  |
| C | -5.31932200 | -1.41527600 | 0.70149100  |
| H | -6.24912300 | -0.91723100 | 0.42522600  |

|    |             |             |             |
|----|-------------|-------------|-------------|
| H  | -5.51643900 | -1.96325600 | 1.62325500  |
| C  | -4.81246300 | -2.35629700 | -0.43120400 |
| H  | -4.74690500 | -3.39198800 | -0.09666300 |
| H  | -5.47975400 | -2.34492000 | -1.29347900 |
| Te | 0.72134300  | 0.71303400  | -1.19953200 |
| C  | 2.22271100  | -0.36585800 | -0.14189100 |
| C  | 1.95940700  | -1.25071300 | 0.91069100  |
| C  | 3.52831400  | -0.10367200 | -0.58386600 |
| C  | 3.05052400  | -1.87937000 | 1.50448100  |
| C  | 4.57375500  | -0.75935300 | 0.05398700  |
| C  | 4.35781900  | -1.65505100 | 1.09397700  |
| H  | 2.86508700  | -2.56770000 | 2.32099200  |
| H  | 5.58786800  | -0.56044500 | -0.27261300 |
| Si | -0.30087200 | 2.18337300  | 0.70434300  |
| C  | -0.57716900 | 3.87867900  | 0.00519300  |
| H  | -1.16111100 | 3.84403100  | -0.91432200 |
| H  | -1.13944300 | 4.46824200  | 0.73458700  |
| H  | 0.36373500  | 4.39477300  | -0.18741900 |
| C  | 0.85545700  | 2.15484600  | 2.15313000  |
| H  | 1.18549600  | 1.14794800  | 2.40645300  |
| H  | 1.73374500  | 2.77104600  | 1.95579700  |
| H  | 0.34037200  | 2.57464000  | 3.02151400  |
| C  | 0.58545500  | -1.57233000 | 1.42921100  |
| H  | -0.00513100 | -0.67739800 | 1.62664200  |
| H  | 0.02272400  | -2.18078400 | 0.71941200  |
| H  | 0.66235500  | -2.12940400 | 2.36047700  |
| C  | 3.84939800  | 0.85719900  | -1.70008600 |
| H  | 3.39229800  | 0.55018500  | -2.64288300 |
| H  | 3.50881900  | 1.87178400  | -1.47839900 |
| H  | 4.92441500  | 0.90615900  | -1.85585400 |
| C  | 5.50555800  | -2.37503100 | 1.73900300  |
| H  | 5.75194800  | -3.27419000 | 1.17038400  |
| H  | 6.39654200  | -1.74938400 | 1.76814500  |
| H  | 5.26046500  | -2.68098300 | 2.75462100  |

30

ace 5-Br 6-SiMe2 cation 2e opt

|   |             |             |             |
|---|-------------|-------------|-------------|
| C | -0.83482000 | -2.40345300 | -0.00009300 |
| C | -0.03594300 | -1.29818900 | -0.00002600 |
| C | -0.51174400 | 0.02255600  | -0.00003900 |
| C | -1.90325500 | 0.12502300  | -0.00013300 |
| C | -2.77613400 | -0.97758300 | -0.00020300 |
| C | -2.24583300 | -2.24098400 | -0.00018300 |
| H | -0.41036000 | -3.39833700 | -0.00008000 |
| C | 0.25872900  | 1.21055900  | 0.00003000  |
| C | -2.57282400 | 1.35944900  | -0.00016700 |
| H | -2.86865600 | -3.12543100 | -0.00023300 |
| C | -1.82778800 | 2.51120200  | -0.00010200 |
| C | -0.41502100 | 2.42013300  | -0.00000300 |
| H | -2.29290500 | 3.48818900  | -0.00012500 |
| H | 0.14464700  | 3.34928200  | 0.00004900  |
| C | -4.05969600 | 1.09406700  | -0.00027600 |

|    |             |             |             |
|----|-------------|-------------|-------------|
| H  | -4.53208000 | 1.54040200  | 0.87523300  |
| H  | -4.53194900 | 1.54040300  | -0.87585500 |
| C  | -4.19564000 | -0.45901400 | -0.00028800 |
| H  | -4.73862100 | -0.81490300 | -0.87604700 |
| H  | -4.73872300 | -0.81490500 | 0.87540700  |
| Si | 2.09618600  | 1.02648700  | 0.00017500  |
| Br | 1.89481100  | -1.43475400 | 0.00009100  |
| C  | 2.99575200  | 1.40449700  | -1.56071400 |
| H  | 3.03314600  | 2.49219700  | -1.67604900 |
| H  | 4.02266100  | 1.03885500  | -1.53472300 |
| H  | 2.48274400  | 0.99158900  | -2.42842000 |
| C  | 2.99547900  | 1.40439500  | 1.56124600  |
| H  | 4.02242100  | 1.03883900  | 1.53537600  |
| H  | 3.03275900  | 2.49208500  | 1.67671700  |
| H  | 2.48236400  | 0.99134300  | 2.42882100  |

30

ace 5-I 6-SiMe2 cation 2f opt

|    |             |             |             |
|----|-------------|-------------|-------------|
| C  | -0.88728500 | -2.36167300 | -0.00013300 |
| C  | -0.17978300 | -1.19270200 | -0.00004600 |
| C  | -0.77520800 | 0.08425500  | -0.00005300 |
| C  | -2.17374700 | 0.05794300  | -0.00015600 |
| C  | -2.94490100 | -1.11873700 | -0.00024700 |
| C  | -2.30568300 | -2.32948900 | -0.00023700 |
| H  | -0.38231300 | -3.31835900 | -0.00012500 |
| C  | -0.13130300 | 1.34736700  | 0.00003000  |
| C  | -2.96032700 | 1.22299900  | -0.00018000 |
| H  | -2.84734900 | -3.26593800 | -0.00030500 |
| C  | -2.33437700 | 2.44214300  | -0.00009900 |
| C  | -0.92049900 | 2.48543300  | 0.00000600  |
| H  | -2.89291300 | 3.36886200  | -0.00011300 |
| H  | -0.45246700 | 3.46477000  | 0.00006800  |
| C  | -4.41575000 | 0.82104500  | -0.00030000 |
| H  | -4.92719100 | 1.22195700  | 0.87522400  |
| H  | -4.92705900 | 1.22200700  | -0.87587800 |
| C  | -4.40615800 | -0.73632600 | -0.00034400 |
| H  | -4.91293900 | -1.14218600 | -0.87610800 |
| H  | -4.91306700 | -1.14223600 | 0.87532300  |
| Si | 1.71542100  | 1.45670300  | 0.00016400  |
| C  | 2.52144100  | 2.02191800  | -1.55904000 |
| H  | 2.34775300  | 3.09822100  | -1.65687600 |
| H  | 3.59958200  | 1.86093800  | -1.53998400 |
| H  | 2.09432100  | 1.53091200  | -2.43238500 |
| C  | 2.52122300  | 2.02184100  | 1.55950900  |
| H  | 3.59936600  | 1.86086500  | 1.54059500  |
| H  | 2.34751800  | 3.09813800  | 1.65737400  |
| H  | 2.09398200  | 1.53079000  | 2.43277000  |
| I  | 1.93417000  | -1.17695600 | 0.00011100  |

26

naph 1-Br 8-SiMe2 cation 9e opt

|   |             |             |             |
|---|-------------|-------------|-------------|
| C | -1.54202600 | -2.21065700 | -0.00012600 |
| C | -0.66069500 | -1.17926600 | -0.00005900 |

|    |             |             |             |
|----|-------------|-------------|-------------|
| C  | -1.00592400 | 0.18619100  | -0.00007300 |
| C  | -2.39426100 | 0.47568400  | -0.00016700 |
| C  | -3.32966500 | -0.58811000 | -0.00023700 |
| C  | -2.91953600 | -1.89033400 | -0.00021700 |
| H  | -1.21691100 | -3.24166600 | -0.00011300 |
| C  | -0.05000500 | 1.23496100  | 0.00000100  |
| C  | -2.79277800 | 1.83377800  | -0.00018900 |
| H  | -3.64038300 | -2.69602700 | -0.00027100 |
| C  | -1.86783100 | 2.83961200  | -0.00012100 |
| C  | -0.49014700 | 2.53851600  | -0.00002500 |
| H  | -2.18603400 | 3.87306800  | -0.00014100 |
| H  | 0.21639500  | 3.36165200  | 0.00003000  |
| Si | 1.75312900  | 0.82562200  | 0.00014700  |
| Br | 1.24069000  | -1.55888400 | 0.00005500  |
| C  | 2.68099800  | 1.11351800  | -1.56273000 |
| H  | 2.83520600  | 2.19145300  | -1.67233400 |
| H  | 3.66288600  | 0.63969500  | -1.54264700 |
| H  | 2.12384400  | 0.76308900  | -2.43074000 |
| C  | 2.68072000  | 1.11345400  | 1.56320100  |
| H  | 3.66261300  | 0.63963500  | 1.54327400  |
| H  | 2.83490300  | 2.19138500  | 1.67288000  |
| H  | 2.12341200  | 0.76298500  | 2.43109700  |
| H  | -3.85141000 | 2.06209400  | -0.00026200 |
| H  | -4.38558500 | -0.34923800 | -0.00030900 |

31

ace-H-SiMe2-F opt

|   |             |             |             |
|---|-------------|-------------|-------------|
| C | 2.56565300  | 2.10194400  | -0.00002200 |
| C | 2.71530200  | 0.74301300  | 0.00002500  |
| C | 1.56545000  | -0.06707400 | -0.00000200 |
| C | 0.25421000  | 0.42889500  | -0.00000200 |
| C | 0.13448200  | 1.84238400  | -0.00002000 |
| C | 1.25441200  | 2.63790900  | -0.00004400 |
| H | 3.41884200  | 2.76898400  | -0.00001100 |
| C | 1.88197700  | -1.43843600 | -0.00001500 |
| C | -0.80742700 | -0.52942000 | 0.00004100  |
| H | 1.13352700  | 3.71410100  | -0.00006900 |
| C | -0.47309900 | -1.87012100 | 0.00006600  |
| C | 0.86284600  | -2.34700200 | 0.00003900  |
| H | -1.27129700 | -2.60397800 | 0.00012300  |
| H | 1.04992800  | -3.41386600 | 0.00004300  |
| C | 3.38620400  | -1.59667600 | -0.00018000 |
| H | 3.72006000  | -2.15465200 | 0.87582200  |
| H | 3.71981900  | -2.15398900 | -0.87670400 |
| C | 3.94217700  | -0.14219900 | 0.00022800  |
| H | 4.56257000  | 0.05005400  | 0.87678600  |
| H | 4.56326600  | 0.05037200  | -0.87575800 |
| C | -3.10262500 | 0.86097200  | 1.54146500  |
| H | -2.57701000 | 1.81348500  | 1.62696300  |
| H | -4.17510600 | 1.06398900  | 1.54248600  |
| H | -2.86371900 | 0.26827000  | 2.42575800  |
| C | -3.10235500 | 0.86069400  | -1.54169400 |

|    |             |             |             |
|----|-------------|-------------|-------------|
| H  | -4.17484800 | 1.06359100  | -1.54322300 |
| H  | -2.57676700 | 1.81322900  | -1.62713700 |
| H  | -2.86297000 | 0.26788300  | -2.42579200 |
| Si | -2.60959700 | -0.05338700 | 0.00001300  |
| F  | -3.41674700 | -1.44622900 | 0.00013500  |
| H  | -0.84444700 | 2.30670400  | 0.00000500  |

42

ace-OPh-SiMe2-F 12a opt

|    |             |             |             |
|----|-------------|-------------|-------------|
| C  | 1.23051600  | -2.93561000 | 0.38129600  |
| C  | 2.38727500  | -2.24106000 | 0.16995300  |
| C  | 2.31810100  | -0.84039500 | 0.05177400  |
| C  | 1.13585700  | -0.09351300 | 0.12944000  |
| C  | -0.03590900 | -0.85937100 | 0.35660800  |
| C  | 0.00893100  | -2.22537600 | 0.48029700  |
| H  | 1.22184700  | -4.01360800 | 0.48339500  |
| C  | 3.58232600  | -0.26117300 | -0.16076700 |
| C  | 1.21697900  | 1.32493400  | -0.02212400 |
| H  | -0.91048000 | -2.76695600 | 0.66098400  |
| C  | 2.47431000  | 1.86356900  | -0.22974700 |
| C  | 3.66415200  | 1.09426000  | -0.29891900 |
| H  | 2.56431100  | 2.93634400  | -0.34916900 |
| H  | 4.61147800  | 1.59349900  | -0.46235500 |
| C  | 4.62604700  | -1.35520600 | -0.18646200 |
| H  | 5.16645600  | -1.35842900 | -1.13391000 |
| H  | 5.36707400  | -1.20479200 | 0.59979700  |
| C  | 3.82898200  | -2.67732500 | 0.02437000  |
| H  | 3.95192600  | -3.35492400 | -0.82159100 |
| H  | 4.17093300  | -3.21221500 | 0.91131600  |
| O  | -1.19277900 | -0.13102800 | 0.50838500  |
| C  | -1.33534400 | 2.34994500  | -1.49963900 |
| H  | -1.89732200 | 1.41622200  | -1.50277400 |
| H  | -2.04990600 | 3.17570300  | -1.51971800 |
| H  | -0.73918600 | 2.39900700  | -2.41236200 |
| C  | -2.40797500 | -0.67930100 | 0.16864600  |
| C  | -3.44884900 | -0.53814900 | 1.07177300  |
| C  | -2.60805700 | -1.28253600 | -1.06656500 |
| C  | -4.71116900 | -1.00599800 | 0.73168800  |
| H  | -3.25505800 | -0.06595000 | 2.02574600  |
| C  | -3.87135800 | -1.75111200 | -1.39103700 |
| H  | -1.77832500 | -1.37828000 | -1.75528300 |
| C  | -4.92576600 | -1.61475500 | -0.49601300 |
| H  | -5.52721300 | -0.89627900 | 1.43383500  |
| H  | -4.03410700 | -2.21900100 | -2.35318600 |
| H  | -5.90966000 | -1.98037900 | -0.75710900 |
| C  | -1.17834800 | 2.61510600  | 1.59686200  |
| H  | -1.25766700 | 3.65856700  | 1.90617900  |
| H  | -2.18462300 | 2.21203400  | 1.47851900  |
| H  | -0.68233800 | 2.05553400  | 2.39007400  |
| Si | -0.23679600 | 2.51175400  | -0.00842700 |
| F  | 0.48056000  | 3.95177600  | -0.18223200 |

38

## naph-OPh-SiMe2-F 13a opt

|    |             |             |             |
|----|-------------|-------------|-------------|
| C  | 0.50663500  | 3.46357900  | -0.22604500 |
| C  | 1.84071800  | 3.21647900  | -0.09362900 |
| C  | 2.32087100  | 1.88560300  | -0.01725800 |
| C  | 1.41456400  | 0.79477700  | -0.07178600 |
| C  | 0.03660500  | 1.11211400  | -0.21681900 |
| C  | -0.41591100 | 2.39953500  | -0.29332300 |
| H  | 0.14054100  | 4.47994000  | -0.28727200 |
| C  | 3.70391900  | 1.61813000  | 0.11601900  |
| C  | 1.88677500  | -0.55221500 | 0.01610500  |
| H  | -1.47206300 | 2.59860100  | -0.41093600 |
| C  | 3.24577000  | -0.74248600 | 0.14543200  |
| C  | 4.15606300  | 0.33459500  | 0.19216600  |
| H  | 3.63712100  | -1.74899900 | 0.21575400  |
| H  | 5.21481200  | 0.13261500  | 0.29212300  |
| O  | -0.79135700 | 0.02293900  | -0.32003600 |
| C  | -0.18662600 | -2.35789100 | 1.54762300  |
| H  | -1.09056800 | -1.75079300 | 1.55880500  |
| H  | -0.48083000 | -3.40772000 | 1.61402100  |
| H  | 0.40297700  | -2.12143400 | 2.43502100  |
| C  | -2.14638500 | 0.16558900  | -0.10897300 |
| C  | -3.00686600 | -0.14303000 | -1.14821100 |
| C  | -2.62687100 | 0.54575700  | 1.13646100  |
| C  | -4.37767200 | -0.07417100 | -0.93379600 |
| H  | -2.59374200 | -0.43223300 | -2.10547700 |
| C  | -3.99642700 | 0.61668400  | 1.33652100  |
| H  | -1.92616100 | 0.78208000  | 1.92739900  |
| C  | -4.87401100 | 0.30637200  | 0.30415000  |
| H  | -5.05694500 | -0.31673400 | -1.74035600 |
| H  | -4.37988200 | 0.90928900  | 2.30513600  |
| H  | -5.94200800 | 0.36011500  | 0.46711200  |
| C  | -0.07986100 | -2.48256600 | -1.57202700 |
| H  | 0.18084000  | -3.48311700 | -1.92006200 |
| H  | -1.15830700 | -2.44209700 | -1.41397700 |
| H  | 0.17358900  | -1.76734600 | -2.35498000 |
| Si | 0.83418700  | -2.11594200 | 0.01122400  |
| F  | 1.96108000  | -3.27532200 | 0.11507200  |
| H  | 4.39198800  | 2.45414800  | 0.15500000  |
| H  | 2.55341700  | 4.03014200  | -0.04546000 |

42

## ace-SPh-SiMe2-F 12b opt

|   |             |             |             |
|---|-------------|-------------|-------------|
| C | -1.97628100 | -2.51074500 | -1.31746700 |
| C | -2.79999300 | -1.79782600 | -0.49228400 |
| C | -2.36766800 | -0.55237400 | 0.00172700  |
| C | -1.12530100 | 0.04006500  | -0.29697800 |
| C | -0.27958800 | -0.75466000 | -1.12974800 |
| C | -0.70930500 | -1.96951000 | -1.61977400 |
| H | -2.26396100 | -3.47012600 | -1.72829300 |
| C | -3.33446000 | 0.03062800  | 0.84459400  |
| C | -0.86362600 | 1.33468500  | 0.26270000  |
| H | -0.03108300 | -2.53335100 | -2.24780000 |

|    |             |             |             |
|----|-------------|-------------|-------------|
| C  | -1.83709600 | 1.87514900  | 1.08684200  |
| C  | -3.06459900 | 1.24377800  | 1.40274600  |
| H  | -1.66472000 | 2.85556800  | 1.51184000  |
| H  | -3.76624600 | 1.73926000  | 2.06242600  |
| C  | -4.52904900 | -0.88785700 | 0.95125900  |
| H  | -4.68271000 | -1.20428500 | 1.98390500  |
| H  | -5.44307400 | -0.38414800 | 0.63498600  |
| C  | -4.18599600 | -2.09281100 | 0.03141400  |
| H  | -4.20859600 | -3.03841200 | 0.57430800  |
| H  | -4.89654000 | -2.18344400 | -0.79149400 |
| C  | 2.21006200  | 2.09056000  | 0.72800700  |
| H  | 2.99542500  | 1.87696700  | 0.00296600  |
| H  | 2.51415600  | 2.95401600  | 1.32237800  |
| H  | 2.13397600  | 1.22898000  | 1.39269200  |
| C  | 2.32706500  | -1.04721600 | -0.25857800 |
| C  | 3.71189200  | -0.98328800 | -0.40329000 |
| C  | 1.77770500  | -1.66995400 | 0.85624800  |
| C  | 4.53759100  | -1.53038400 | 0.56472900  |
| H  | 4.13901600  | -0.50232400 | -1.27541400 |
| C  | 2.61484800  | -2.21877800 | 1.81901600  |
| H  | 0.70414300  | -1.72305200 | 0.97917000  |
| C  | 3.99315200  | -2.15065100 | 1.68210200  |
| H  | 5.61158500  | -1.47395900 | 0.44277200  |
| H  | 2.17924300  | -2.69989700 | 2.68538300  |
| H  | 4.63869900  | -2.57846700 | 2.43730600  |
| C  | 0.69017700  | 2.95784100  | -1.90661400 |
| H  | 0.33322400  | 3.98222800  | -2.02668800 |
| H  | 1.71352700  | 2.90230400  | -2.27873700 |
| H  | 0.07329800  | 2.30915800  | -2.52926400 |
| Si | 0.58657800  | 2.48800800  | -0.10128700 |
| F  | 0.11611300  | 3.85269700  | 0.63985900  |
| S  | 1.37039700  | -0.25020800 | -1.52081600 |

42

ace-SePh-SiMe2-F 12c opt

|    |             |             |             |
|----|-------------|-------------|-------------|
| Se | -1.38294100 | -0.17445200 | -1.45505200 |
| C  | 1.07123300  | 1.33806200  | 0.35020400  |
| C  | 2.08032300  | 1.84470600  | 1.15354500  |
| C  | 3.29564900  | 1.17864200  | 1.43771300  |
| C  | 3.51465700  | -0.04013600 | 0.87150100  |
| C  | 2.51121200  | -0.59342800 | 0.05129900  |
| C  | 2.89836900  | -1.85309600 | -0.44551500 |
| C  | 2.04190800  | -2.54371100 | -1.25432000 |
| C  | 0.78748800  | -1.96447100 | -1.53748500 |
| C  | 0.40077300  | -0.73691700 | -1.04354600 |
| C  | 1.27896000  | 0.03692900  | -0.22284500 |
| C  | -2.32802700 | -1.01113500 | -0.00719800 |
| C  | -2.45400800 | -2.19177500 | 2.07914500  |
| C  | -1.69435200 | -1.66039800 | 1.04441000  |
| H  | 0.08753400  | -2.51280700 | -2.15504800 |
| H  | 4.87779400  | -1.29083400 | 1.97838500  |
| H  | -1.95500900 | -2.69431300 | 2.89814800  |

|    |             |             |             |
|----|-------------|-------------|-------------|
| H  | -0.61570500 | -1.74865700 | 1.06464500  |
| C  | -3.71536300 | -0.89915100 | -0.02174200 |
| C  | -4.46413400 | -1.43159000 | 1.01570500  |
| C  | -3.83634600 | -2.07927500 | 2.07195900  |
| H  | -4.42135700 | -2.49335000 | 2.88242400  |
| H  | 1.94772300  | 2.82666700  | 1.58883400  |
| H  | 4.02770900  | 1.65118500  | 2.08112100  |
| C  | 4.68785300  | -0.98790400 | 0.94771000  |
| C  | 4.27902600  | -2.19573500 | 0.06104600  |
| H  | 2.29315300  | -3.51317300 | -1.66582900 |
| H  | 5.59959600  | -0.51163200 | 0.58472800  |
| H  | 4.26585100  | -3.12775500 | 0.62769100  |
| H  | 4.97275100  | -2.33986900 | -0.76846800 |
| H  | -4.21161600 | -0.39348100 | -0.84212900 |
| H  | -5.54254700 | -1.33902900 | 0.99767500  |
| Si | -0.35365400 | 2.54972100  | 0.06492500  |
| C  | -0.51403800 | 3.07480700  | -1.72212100 |
| H  | 0.06863700  | 2.43535500  | -2.38609300 |
| H  | -1.55049300 | 3.05185200  | -2.05907400 |
| H  | -0.13898500 | 4.09508800  | -1.82160200 |
| C  | -1.94600200 | 2.18472900  | 0.96896000  |
| H  | -1.90428000 | 1.24077100  | 1.51331300  |
| H  | -2.12670600 | 2.98558900  | 1.68820400  |
| H  | -2.79649300 | 2.13403300  | 0.28840300  |
| F  | 0.19139000  | 3.88497100  | 0.80854800  |

38

naph-SePh-SiMe2-F 13c opt

|    |             |             |             |
|----|-------------|-------------|-------------|
| Se | -0.96884500 | 0.00710100  | -1.45937100 |
| C  | 1.65946300  | 0.65190400  | 0.48815200  |
| C  | 2.64553000  | 0.86815500  | 1.42942700  |
| C  | 3.52360900  | -0.13999500 | 1.87568500  |
| C  | 3.44142700  | -1.38536900 | 1.33780500  |
| C  | 2.45009800  | -1.68411300 | 0.37286300  |
| C  | 2.39351800  | -2.99124000 | -0.16492300 |
| C  | 1.44247300  | -3.33899300 | -1.07665300 |
| C  | 0.48110200  | -2.38610300 | -1.45522300 |
| C  | 0.50400600  | -1.11031500 | -0.94898500 |
| C  | 1.51977500  | -0.68009100 | -0.03768100 |
| C  | -2.19146000 | -0.40700600 | -0.03850700 |
| C  | -2.79431500 | -1.39585500 | 2.06360700  |
| C  | -1.85752000 | -1.19121500 | 1.05774100  |
| H  | -0.30911400 | -2.66647000 | -2.13899800 |
| H  | -2.52823400 | -2.00520700 | 2.91800600  |
| H  | -0.87500100 | -1.63798600 | 1.13743400  |
| C  | -3.45782000 | 0.16432200  | -0.12739700 |
| C  | -4.38421400 | -0.04488000 | 0.88160400  |
| C  | -4.05563800 | -0.82530500 | 1.98270500  |
| H  | -4.77944100 | -0.98708200 | 2.77036800  |
| H  | 2.77818800  | 1.86176100  | 1.83578600  |
| H  | 4.27222500  | 0.09299900  | 2.62189400  |
| H  | 1.40355400  | -4.33797000 | -1.49003500 |



|    |             |             |             |
|----|-------------|-------------|-------------|
| H  | -3.72055900 | 0.77466300  | -0.98381400 |
| H  | -5.36663800 | 0.40324000  | 0.80468400  |
| Si | 0.79406400  | 2.25758600  | -0.04165700 |
| C  | 1.01288800  | 2.63494700  | -1.85958300 |
| H  | 1.33944900  | 1.76146900  | -2.42494800 |
| H  | 0.08664800  | 2.99659200  | -2.30721200 |
| H  | 1.77391400  | 3.41008200  | -1.96564600 |
| C  | -0.88634500 | 2.59100500  | 0.70289100  |
| H  | -1.22665400 | 1.76505900  | 1.32859200  |
| H  | -0.82081900 | 3.48673100  | 1.32288400  |
| H  | -1.64461800 | 2.75544200  | -0.06332800 |
| F  | 1.72316100  | 3.37613400  | 0.68091100  |
| H  | 3.12866100  | -3.71340000 | 0.17043600  |
| H  | 4.12437700  | -2.17188200 | 1.63633200  |

51

ace-TeMes-SiMe2-F 12d opt

|    |             |             |             |
|----|-------------|-------------|-------------|
| C  | -0.04645800 | 1.47694600  | -1.62560800 |
| C  | 0.47964300  | 0.39859900  | -0.94513700 |
| C  | 1.73606000  | 0.51356100  | -0.26868500 |
| C  | 2.30317100  | 1.80654000  | -0.31241700 |
| C  | 1.74754200  | 2.90693000  | -0.99502100 |
| C  | 0.57292100  | 2.74403600  | -1.66927300 |
| H  | -0.99930700 | 1.36111500  | -2.12778400 |
| C  | 2.47712300  | -0.48238600 | 0.45848300  |
| C  | 3.48918100  | 2.17602100  | 0.35524500  |
| H  | 0.10382100  | 3.55372600  | -2.21407400 |
| C  | 4.14920100  | 1.23829100  | 1.08909800  |
| C  | 3.63304700  | -0.07730800 | 1.10817000  |
| H  | 5.05786500  | 1.46776000  | 1.63168200  |
| H  | 4.20786600  | -0.81777300 | 1.65051500  |
| C  | 3.77904700  | 3.63740800  | 0.11012400  |
| H  | 4.75931100  | 3.77232500  | -0.34839900 |
| H  | 3.79021100  | 4.19097100  | 1.05015100  |
| C  | 2.63356100  | 4.11716100  | -0.82145400 |
| H  | 2.08071200  | 4.95240100  | -0.39006100 |
| H  | 3.01667600  | 4.45507400  | -1.78551900 |
| Te | -0.83469500 | -1.26221500 | -0.79518000 |
| C  | -2.44846400 | -0.17830900 | 0.07075400  |
| C  | -2.26031400 | 0.63053200  | 1.19938900  |
| C  | -3.72444600 | -0.31805900 | -0.49888200 |
| C  | -3.36015100 | 1.31226300  | 1.71910600  |
| C  | -4.78905100 | 0.37616300  | 0.06306600  |
| C  | -4.62660700 | 1.20445800  | 1.16704600  |
| H  | -3.21574800 | 1.93823400  | 2.59322200  |
| H  | -5.77544800 | 0.26477900  | -0.37463900 |
| Si | 2.24219800  | -2.34996100 | 0.53734500  |
| C  | 1.92820000  | -3.11994100 | -1.13742300 |
| H  | 1.70879600  | -2.38062000 | -1.91002100 |
| H  | 2.84103300  | -3.63997200 | -1.43543500 |
| H  | 1.11484900  | -3.84554800 | -1.11673200 |
| C  | 1.20572800  | -2.97620400 | 1.94991800  |

|   |             |             |             |
|---|-------------|-------------|-------------|
| H | 0.15792100  | -2.69544200 | 1.88361700  |
| H | 1.27388700  | -4.06575500 | 1.99020600  |
| H | 1.61513100  | -2.58396000 | 2.88359300  |
| C | -0.93066800 | 0.81022900  | 1.87848200  |
| H | -0.35848400 | -0.11875400 | 1.90521800  |
| H | -0.31794300 | 1.54622900  | 1.35232200  |
| H | -1.07371900 | 1.15985900  | 2.89990000  |
| C | -3.98570300 | -1.19969000 | -1.69178300 |
| H | -3.37518900 | -0.90014900 | -2.54523700 |
| H | -3.74576800 | -2.24388300 | -1.48078800 |
| H | -5.03470400 | -1.15009000 | -1.97886000 |
| C | -5.79241300 | 1.96679000  | 1.73237200  |
| H | -6.01908300 | 2.83819500  | 1.11418700  |
| H | -6.68874800 | 1.34683900  | 1.76501600  |
| H | -5.58136600 | 2.31948100  | 2.74110700  |
| F | 3.71665100  | -2.88606600 | 0.93999000  |

31

ace 5-Br 6-SiFMe2 12e opt

|    |             |             |             |
|----|-------------|-------------|-------------|
| C  | -1.27292400 | -2.37616900 | 0.07629000  |
| C  | -0.29273300 | -1.41663000 | -0.00528600 |
| C  | -0.59274100 | -0.02387700 | -0.02929500 |
| C  | -1.97944600 | 0.24348600  | 0.00477400  |
| C  | -2.99253500 | -0.73135500 | 0.08753900  |
| C  | -2.64230300 | -2.04922500 | 0.13175900  |
| H  | -0.97754100 | -3.41624200 | 0.08859400  |
| C  | 0.29094500  | 1.11309400  | -0.09232300 |
| C  | -2.53240100 | 1.54025600  | -0.05054800 |
| H  | -3.37879500 | -2.84002900 | 0.19608800  |
| C  | -1.69405500 | 2.60758400  | -0.14074900 |
| C  | -0.30057200 | 2.36418600  | -0.15203100 |
| H  | -2.06241300 | 3.62441400  | -0.19554900 |
| H  | 0.33430700  | 3.23845800  | -0.20662800 |
| C  | -4.03882400 | 1.45437100  | -0.00633500 |
| H  | -4.43782300 | 2.01550600  | 0.83942900  |
| H  | -4.47619200 | 1.88588300  | -0.90767300 |
| C  | -4.34645400 | -0.06285500 | 0.10953900  |
| H  | -4.97108200 | -0.41306100 | -0.71299700 |
| H  | -4.87863400 | -0.29473100 | 1.03314500  |
| Si | 2.16978900  | 1.18975300  | 0.05156500  |
| Br | 1.48493000  | -2.06597200 | -0.13846000 |
| C  | 2.75775400  | 2.95497600  | -0.08005000 |
| H  | 2.40249900  | 3.58117200  | 0.73937400  |
| H  | 3.84917100  | 2.93656800  | -0.03155600 |
| H  | 2.47835700  | 3.42026000  | -1.02616700 |
| C  | 2.79971600  | 0.48675800  | 1.66041700  |
| H  | 3.73522800  | -0.05058300 | 1.49207300  |
| H  | 2.99894900  | 1.29972400  | 2.36167100  |
| H  | 2.09749900  | -0.20317600 | 2.12482700  |
| F  | 2.88403400  | 0.47119000  | -1.19473700 |

31

ace 5-I 6-SiFMe2 12f opt

|    |             |             |             |
|----|-------------|-------------|-------------|
| C  | -0.99059800 | -2.38163300 | 0.24478500  |
| C  | -0.22270900 | -1.25212200 | 0.07160100  |
| C  | -0.80849200 | 0.04704800  | -0.02329200 |
| C  | -2.22258600 | 0.02156900  | 0.00359000  |
| C  | -3.01202100 | -1.13186000 | 0.17679400  |
| C  | -2.39686200 | -2.34070100 | 0.31693200  |
| H  | -0.49756000 | -3.34160700 | 0.31004500  |
| C  | -0.18945800 | 1.34499700  | -0.15119700 |
| C  | -3.03727300 | 1.16289700  | -0.15928600 |
| H  | -2.95266300 | -3.25928200 | 0.45608900  |
| C  | -2.44479400 | 2.37219500  | -0.34569100 |
| C  | -1.03238000 | 2.43172700  | -0.31853600 |
| H  | -3.01943100 | 3.27832900  | -0.49147600 |
| H  | -0.59742500 | 3.41630500  | -0.42516500 |
| Si | 1.60174300  | 1.86544000  | 0.12880000  |
| C  | -4.47533600 | -0.76096200 | 0.17069100  |
| H  | -4.93556300 | -0.99654300 | 1.13150300  |
| H  | -5.02248100 | -1.32009500 | -0.58891800 |
| C  | -4.49222400 | 0.76524200  | -0.10776700 |
| H  | -4.98428600 | 0.99383000  | -1.05429700 |
| H  | -5.02460900 | 1.31676300  | 0.66774600  |
| I  | 1.82561900  | -1.62712900 | -0.17308600 |
| C  | 1.76652300  | 3.72170800  | 0.05135100  |
| H  | 2.81966000  | 3.95809600  | 0.22159400  |
| H  | 1.49383800  | 4.12725500  | -0.92378800 |
| H  | 1.18457000  | 4.23066300  | 0.82059800  |
| C  | 2.23704600  | 1.29938300  | 1.78888500  |
| H  | 2.14037400  | 2.11595700  | 2.50788700  |
| H  | 3.29386600  | 1.03461100  | 1.71816300  |
| H  | 1.70120900  | 0.43575100  | 2.17904500  |
| F  | 2.57169900  | 1.37052100  | -1.05242400 |

27

naph 1-Br 8-SiFMe2 13e opt

|    |             |             |             |
|----|-------------|-------------|-------------|
| C  | -2.39708500 | -1.52673100 | 0.22750400  |
| C  | -1.16710300 | -0.95954500 | 0.02681800  |
| C  | -0.96732100 | 0.45161500  | -0.03288400 |
| C  | -2.16486300 | 1.23020200  | 0.03426600  |
| C  | -3.42591400 | 0.62581600  | 0.24086300  |
| C  | -3.54281500 | -0.72629700 | 0.35794000  |
| H  | -2.48359500 | -2.60352800 | 0.26149500  |
| C  | 0.29833000  | 1.13201800  | -0.16340900 |
| C  | -2.10758200 | 2.63680800  | -0.12427500 |
| H  | -4.50534900 | -1.19238000 | 0.52010800  |
| C  | -0.92049200 | 3.26130400  | -0.33301200 |
| C  | 0.26710200  | 2.50149000  | -0.32584600 |
| H  | -0.87221400 | 4.33299000  | -0.47416000 |
| H  | 1.19444600  | 3.04654000  | -0.43516100 |
| Si | 2.05426800  | 0.48901900  | 0.13057900  |
| Br | 0.24387700  | -2.19041600 | -0.28090600 |
| C  | 3.26460400  | 1.90818300  | 0.13830500  |
| H  | 3.05552500  | 2.63768800  | 0.92166200  |

|   |             |             |             |
|---|-------------|-------------|-------------|
| H | 4.25245400  | 1.48435100  | 0.33475200  |
| H | 3.31665900  | 2.42474800  | -0.82089900 |
| C | 2.20074200  | -0.40092000 | 1.76319100  |
| H | 2.86299800  | -1.26292900 | 1.66151800  |
| H | 2.63312500  | 0.27155200  | 2.50689600  |
| H | 1.24347300  | -0.75831800 | 2.13932100  |
| F | 2.59047800  | -0.42520100 | -1.07582800 |
| H | -4.29792400 | 1.26539300  | 0.29790000  |
| H | -3.03495900 | 3.19533600  | -0.08415800 |

47

(C6F5)3B-NC(C6H4F) BCF adduct 4 opt

|   |             |             |             |
|---|-------------|-------------|-------------|
| B | -0.32607200 | -0.05458200 | -0.09575100 |
| C | -0.72460700 | -1.51690800 | -0.69141000 |
| C | -1.58445100 | -1.76571200 | -1.74996100 |
| C | -0.15693400 | -2.64884100 | -0.11962400 |
| C | -1.88137400 | -3.04598200 | -2.19636400 |
| C | -0.41814300 | -3.93830000 | -0.53544700 |
| C | -1.29671300 | -4.13830800 | -1.58669500 |
| C | -0.92839400 | 1.22847000  | -0.89189800 |
| C | -2.28716700 | 1.48230600  | -0.75280100 |
| C | -0.23793800 | 2.14672000  | -1.66314000 |
| C | -2.92791200 | 2.56379200  | -1.32410400 |
| C | -0.83883600 | 3.24767000  | -2.25401300 |
| C | -2.19241900 | 3.45914200  | -2.08299700 |
| C | -0.61357000 | 0.14107700  | 1.50142400  |
| C | -1.48131000 | -0.62720900 | 2.26339500  |
| C | -0.00585000 | 1.19017200  | 2.17794800  |
| C | -1.72256600 | -0.38368600 | 3.60640400  |
| C | -0.21434500 | 1.46563500  | 3.51666100  |
| C | -1.08376700 | 0.66744400  | 4.23799100  |
| F | 1.08187000  | 2.01743700  | -1.88961900 |
| F | -0.12063000 | 4.09773500  | -2.98082400 |
| F | -2.78248300 | 4.50530100  | -2.64164400 |
| F | -4.23107700 | 2.75039800  | -1.16114600 |
| F | -3.03777400 | 0.62888000  | -0.05018200 |
| F | 0.69828800  | -2.50909500 | 0.90719100  |
| F | 0.15905900  | -4.97890500 | 0.05522400  |
| F | -1.56496100 | -5.36505700 | -2.00711100 |
| F | -2.18098000 | -0.77209000 | -2.41090400 |
| F | -2.71747000 | -3.22727500 | -3.21088500 |
| F | -2.14332100 | -1.65254500 | 1.72554800  |
| F | -2.56156000 | -1.14999000 | 4.29193900  |
| F | -1.30237400 | 0.90894900  | 5.52198500  |
| F | 0.40246800  | 2.48209000  | 4.10941900  |
| F | 0.83528500  | 2.00546400  | 1.52068000  |
| N | 1.24646700  | -0.02494100 | -0.21964100 |
| C | 2.38387600  | -0.01696500 | -0.26447700 |
| C | 3.80257900  | 0.03306800  | -0.33575900 |
| C | 4.40764000  | 1.17556300  | -0.86434700 |
| C | 4.55811000  | -1.04737400 | 0.12314200  |
| C | 5.78500400  | 1.23618600  | -0.93523800 |

|   |            |             |             |
|---|------------|-------------|-------------|
| H | 3.79602400 | 1.99813800  | -1.21032900 |
| C | 5.93538200 | -0.98489400 | 0.05190800  |
| H | 4.06469400 | -1.91989200 | 0.53015400  |
| C | 6.51951900 | 0.15518500  | -0.47610600 |
| H | 6.29685600 | 2.09952000  | -1.33638400 |
| H | 6.56140400 | -1.79655300 | 0.39465900  |
| F | 7.84468400 | 0.21389800  | -0.54509400 |

34

B(C6F5)3 opt

|   |             |             |             |
|---|-------------|-------------|-------------|
| B | 0.00000000  | 0.00000000  | 0.02209400  |
| C | -0.00450000 | 1.56471800  | 0.01755300  |
| C | 0.96493800  | 2.31240400  | 0.68351000  |
| C | -0.97206900 | 2.30146200  | -0.66279700 |
| C | 0.97736700  | 3.69367400  | 0.68892900  |
| C | -0.97982900 | 3.68258100  | -0.69689700 |
| C | 0.00000000  | 4.38104300  | -0.01153500 |
| C | 1.35733600  | -0.77846200 | 0.01755300  |
| C | 1.52013100  | -1.99186300 | 0.68351000  |
| C | 2.47915900  | -0.30889500 | -0.66279700 |
| C | 2.71013200  | -2.69326100 | 0.68892900  |
| C | 3.67912300  | -0.99273400 | -0.69689700 |
| C | 3.79409400  | -2.19052100 | -0.01153500 |
| C | -1.35283600 | -0.78625600 | 0.01755300  |
| C | -2.48507000 | -0.32054100 | 0.68351000  |
| C | -1.50709000 | -1.99256700 | -0.66279700 |
| C | -3.68749900 | -1.00041200 | 0.68892900  |
| C | -2.69929500 | -2.68984700 | -0.69689700 |
| C | -3.79409400 | -2.19052100 | -0.01153500 |
| F | 2.42376000  | 0.83448100  | -1.34287400 |
| F | 4.71568400  | -0.51568600 | -1.36971700 |
| F | 4.93545500  | -2.85123400 | -0.02485600 |
| F | 2.82411100  | -3.83637300 | 1.34815100  |
| F | 0.51100500  | -2.52001500 | 1.37269600  |
| F | -1.93456200 | 1.68179700  | -1.34287400 |
| F | -1.91124400 | 4.34174500  | -1.36971700 |
| F | 0.00151300  | 5.69984700  | -0.02485600 |
| F | 1.92689400  | 1.70255000  | 1.37269600  |
| F | 1.91034100  | 4.36393900  | 1.34815100  |
| F | -2.43789900 | 0.81746400  | 1.37269600  |
| F | -4.73445300 | -0.52756500 | 1.34815100  |
| F | -4.93696800 | -2.84861300 | -0.02485600 |
| F | -2.80443900 | -3.82605900 | -1.36971700 |
| F | -0.48919800 | -2.51627800 | -1.34287400 |

35

(C6F5)3B-F opt in DCM

|   |             |             |             |
|---|-------------|-------------|-------------|
| B | -0.00336400 | 0.00218600  | 0.77516900  |
| C | -1.53406400 | 0.38224000  | 0.29556600  |
| C | -2.31736200 | -0.30333200 | -0.61644900 |
| C | -2.15049500 | 1.48606300  | 0.86939700  |
| C | -3.61988100 | 0.05504400  | -0.93083600 |
| C | -3.44479300 | 1.88022400  | 0.58809500  |

|   |             |             |             |
|---|-------------|-------------|-------------|
| C | -4.19030300 | 1.15306200  | -0.32143200 |
| C | 0.43382000  | -1.51340900 | 0.29793600  |
| C | 1.40266800  | -1.84540900 | -0.63289600 |
| C | -0.19877000 | -2.60078700 | 0.88509000  |
| C | 1.74523800  | -3.15115300 | -0.95036200 |
| C | 0.10982300  | -3.91786800 | 0.60164400  |
| C | 1.09728500  | -4.19653900 | -0.32531300 |
| C | 1.09549800  | 1.13581900  | 0.30032900  |
| C | 0.90150500  | 2.15130300  | -0.61964100 |
| C | 2.35595900  | 1.11753200  | 0.88161600  |
| C | 1.86764900  | 3.09457800  | -0.93562300 |
| C | 3.34899700  | 2.03624500  | 0.59898800  |
| C | 3.10044000  | 3.03961000  | -0.31913700 |
| F | -1.19814300 | -2.40452500 | 1.75675200  |
| F | -0.53693800 | -4.92025200 | 1.19814900  |
| F | 1.41179400  | -5.45631800 | -0.61565700 |
| F | 2.69276100  | -3.40678200 | -1.85370400 |
| F | 2.07306300  | -0.89760100 | -1.30779800 |
| F | -1.47194500 | 2.26312700  | 1.72525400  |
| F | -3.97929600 | 2.95479500  | 1.16979800  |
| F | -5.43914800 | 1.51143900  | -0.60778700 |
| F | -1.84448000 | -1.37377200 | -1.27468200 |
| F | -4.32636500 | -0.65076600 | -1.81518600 |
| F | -0.25841000 | 2.27562400  | -1.28462700 |
| F | 1.61791500  | 4.05382500  | -1.82832900 |
| F | 4.04032900  | 3.93606600  | -0.60757600 |
| F | 4.54311400  | 1.96279300  | 1.18856900  |
| F | 2.68202700  | 0.14597400  | 1.74579600  |
| F | -0.00655000 | 0.00300900  | 2.20239900  |

22

Et3B opt

|   |             |             |             |
|---|-------------|-------------|-------------|
| B | -0.01197100 | -0.37202000 | 0.20879100  |
| C | -0.03097900 | 1.10496500  | 0.74916300  |
| H | -0.95488100 | 1.33506500  | 1.28524300  |
| H | 0.80191300  | 1.32411100  | 1.42120700  |
| C | 0.06863100  | 2.03192300  | -0.48220300 |
| H | 0.03807700  | 3.08200900  | -0.19009000 |
| H | 1.00050900  | 1.86758300  | -1.02650400 |
| H | -0.75454300 | 1.85769800  | -1.17852800 |
| C | 1.33492300  | -1.18296300 | 0.11509900  |
| H | 1.25145300  | -2.01620000 | -0.58904200 |
| H | 1.40387300  | -1.66101200 | 1.10644000  |
| C | 2.62222200  | -0.39575900 | -0.13968800 |
| H | 2.72340800  | 0.44068700  | 0.55379200  |
| H | 3.50851000  | -1.02247500 | -0.03211900 |
| H | 2.63677900  | 0.01528900  | -1.15062400 |
| C | -1.32993800 | -1.05284000 | -0.32015900 |
| H | -1.20955700 | -1.06830800 | -1.41475600 |
| H | -1.31952300 | -2.11528600 | -0.04933100 |
| C | -2.66815100 | -0.41387300 | 0.04341400  |
| H | -2.70923200 | 0.62882900  | -0.27799800 |

|                          |             |             |             |
|--------------------------|-------------|-------------|-------------|
| H                        | -3.50872800 | -0.93348100 | -0.41857400 |
| H                        | -2.82845700 | -0.42312400 | 1.12316700  |
| 23                       |             |             |             |
| Et3B-F opt               |             |             |             |
| B                        | -0.08072900 | -0.23815400 | 0.48089600  |
| C                        | -0.18017900 | 1.38649400  | 0.70765700  |
| H                        | -1.23545200 | 1.68379800  | 0.77430500  |
| H                        | 0.25319700  | 1.61454700  | 1.69138000  |
| C                        | 0.51619900  | 2.24178400  | -0.35169200 |
| H                        | 0.38351200  | 3.31995000  | -0.20071100 |
| H                        | 1.59291200  | 2.04798300  | -0.35979400 |
| H                        | 0.14369100  | 2.00556200  | -1.35434900 |
| C                        | 1.48270200  | -0.77462500 | 0.49457600  |
| H                        | 1.47300600  | -1.78338000 | 0.92873900  |
| H                        | 2.08349400  | -0.16323700 | 1.18405600  |
| C                        | 2.19713300  | -0.84315200 | -0.85950100 |
| H                        | 2.17768700  | 0.12121500  | -1.37531200 |
| H                        | 3.24738000  | -1.14945000 | -0.77926300 |
| H                        | 1.70088300  | -1.55783500 | -1.52182700 |
| C                        | -0.86732100 | -0.73380400 | -0.87656200 |
| H                        | -0.38530400 | -0.34857800 | -1.78509500 |
| H                        | -0.78623600 | -1.82893700 | -0.94027100 |
| C                        | -2.34684600 | -0.34465300 | -0.89050000 |
| H                        | -2.46187500 | 0.74120900  | -0.96278600 |
| H                        | -2.91113400 | -0.78805200 | -1.72001000 |
| H                        | -2.82270400 | -0.65385300 | 0.04417600  |
| F                        | -0.76217000 | -0.85138200 | 1.62538000  |
| 13                       |             |             |             |
| 4-Fluorobenzonitrile opt |             |             |             |
| C                        | -0.35893900 | 1.20935200  | 0.00000000  |
| C                        | 1.02451900  | 1.21288900  | 0.00000000  |
| C                        | 1.68843100  | 0.00000000  | 0.00000000  |
| C                        | 1.02451900  | -1.21288900 | 0.00000000  |
| C                        | -0.35893900 | -1.20935200 | 0.00000000  |
| C                        | -1.05295500 | 0.00000000  | 0.00000000  |
| H                        | -0.90765800 | 2.14111100  | 0.00000000  |
| H                        | 1.59187000  | 2.13308000  | 0.00000000  |
| H                        | 1.59187000  | -2.13308000 | 0.00000000  |
| H                        | -0.90765800 | -2.14111100 | 0.00000000  |
| C                        | -2.48832500 | 0.00000000  | 0.00000000  |
| N                        | -3.63582800 | 0.00000000  | 0.00000000  |
| F                        | 3.02361100  | 0.00000000  | 0.00000000  |

### 3. References

- [S1] N. Lühmann, *PhD thesis*, University of Oldenburg **2011**.
- [S2] J. Beckmann, T. G. Do, S. Grabowsky, E. Hupf, E. Lork, S. Mebs, *Z. Anorg. Allg. Chem.* **2013**, 2233.
- [S3] N. Lühmann, H. Hirao, S. Shaik, T. Müller, *Organometallics* **2011**, 30, 4087.
- [S4] J. C. W. Chien, W. M. Tsai, M. D. Rausch, *J. Am. Chem. Soc.* **1991**, 113, 8570.
- [S5] B. Su, J. F. Hartwig, *Angew. Chem. Int. Ed.* **2018**, 57, 10163.
- [S6] N. Kordts, S. Künzler, S. Rathjen, T. Sieling, H. Großekappenberg, M. Schmidtman, T. Müller, *Chem. Eur. J.* **2017**, 23, 10068.
- [S7] A. Schäfer, M. Reißmann, A. Schäfer, W. Saak, D. Haase, T. Müller, *Angew. Chem. Int. Ed.* **2011**, 50, 12636.
- [S8] N. Tanaka, T. Kasai, *Bull. Chem. Soc. Jpn.* **1981**, 54, 3020.
- [S9] A. Schäfer, A. Schäfer, T. Müller, *Dalton Trans.* **2010**, 39, 9296.
- [S10] G. M. Sheldrick, University of Göttingen (Germany) **2014**.
- [S11] G. M. Sheldrick, *Acta Crystallogr. Sect. C* **2015**, 71, 3.
- [S12] M. J. T. Frisch, G. W.; Cheeseman, J. R.; Scalmani, G.; Caricato, M.; Hratchian, H. P.; Li, X.; Barone, V.; Bloino, J.; Zheng, G.; Vreven, T.; Montgomery, J. A.; Petersson, G., G. E. S. A.; Scuseria, H. B.; Nakatsuji, H.; Izmaylov, A. F.; Martin, R. L.; J. L. P. Sonnenberg, J. E.; Heyd, J. J.; Brothers, E.; Ogliaro, F.; Bearpark, M.; Robb, B. K. M. A.; Mennucci, K. N.; Staroverov, V. N.; Kobayashi, R.; Normand, J.; A. G. Rendell, R.; Zakrzewski, V. G.; Hada, M.; Ehara, M.; Toyota, K.; Fukuda, and J. I. R.; Hasegawa, M.; Nakajima, T.; Honda, Y.; Kitao, O.; Nakai, H., *Gaussian 09*.
- [S13] Y. Zhao, N. E. Schultz and D. G. Truhlar, *J. Chem. Theory Comput.* **2006**, 2, 364.
- [S14] (a) Krishnan, R.; Blinkley, J. S.; Seeger, R.; Pople, J.A. *J. Chem. Phys.* **1980**, 72, 650; (b) McLean, A. D.; Chandler, G. S. *J. Chem. Phys.* **1980**, 72, 5639; (c) Curtiss, L. A.; McGrath, M. P.; Blandeau, J-P.; Davis, N. E.; Binning, R. C.; Radom, Jr. L. J.



*Chem. Phys.* **1995**, *103*, 6104; (d) Weigend, F.; Ahlrichs, R. *Phys. Chem. Chem. Phys.* **2005**, 3297.
